# Supplementary material for: Palladium-catalyzed domino cyclization/direct functionalization involving the insertion of SO2
Source: Royal Society of Chemistry journal article supplement (doi:10.1039/d3nj05872g), 2024-01-01

## Palladium-Catalyzed Domino Cyclization/Direct Functionalization Involving the Insertion of SO<sub>2</sub>

Xinwei Zhang, Yaoyao Lu, Shuoshuo Zhang, Shuizhen Lin, Mengting Chen, and Xiaolei Huang\*

Key Laboratory of the Ministry of Education for Advanced Catalysis Materials, College of Chemistry and

Materials Science, Zhejiang Normal University, Jinhua, Zhejiang 321004, China. E-mails:

huangxl@zjnu.edu.cn

### Experimental procedures and compound characterization

#### Table of Contents

- I. General information
- II. Condition optimization for the palladium-catalyzed domino cyclization/alkylsulfonylation
- III. Procedure for the palladium-catalyzed domino cyclization/alkylsulfonylation
- IV. Procedure for the palladium-catalyzed domino cyclization/aminosulfonylation
- V. Mechanistic study
- VI. Reference
- VII. Copies of NMR spectra

## I. General information

All NMR spectra were acquired on AV-400 MHz and AV-600 MHz spectrometers.  $^1\text{H}$  NMR chemical shifts were recorded relative to  $\text{CDCl}_3$  as the internal reference ( $\text{CDCl}_3$ :  $\delta$  7.26).  $^{13}\text{C}$  NMR chemical shifts were recorded relative to  $\text{CDCl}_3$  as the internal standard ( $\text{CDCl}_3$ :  $\delta$  77.16). Melting points were determined with XRC-1 and are uncorrected. High resolution mass spectra (HRMS) were obtained with a Waters-Q-TOF-Premier (ESI).

Unless noted otherwise, commercially available chemicals were used as received without purification. Alkenyl bromoarenes **1** were synthesized according to the literature procedures.<sup>[1]</sup> All catalytic experiments were carried out using ultra dry solvents purchased from J&K Scientific. The GC internal standard,  $n\text{-C}_{12}\text{H}_{26}$  was degassed with nitrogen and dried over activated 4 Å molecular sieve beads before use. Gas chromatography (GC) analysis was performed on a Agilent8890B GC System with Agilent J & W GC column DB-5MS-UI.

## II. Condition optimization for the palladium-catalyzed domino cyclization/alkylsulfonylation

A typical procedure: In a nitrogen-filled glove box, **1a** (25.4 mg, 0.1 mmol, 1.0 equiv),  $\text{Na}_2\text{S}_2\text{O}_5$  (38 mg, 0.2 mmol, 2.0 equiv), Pd catalyst (0.01 mmol, 10 mol%),  $\text{PPh}_3$  (6.3 mg, 0.024 mmol, 24 mol%), reductive metal (0.3 mmol, 3 equiv), base (0.35 mmol, 3.5 equiv) and solvent (0.8 mL) were added to a 10-mL Schlenk tube. After stirring at room temperature for 1 min, 1-bromobutane **2a** (32  $\mu\text{L}$ , 0.3 mmol, 3.0 equiv) and GC standard  $n\text{-C}_{12}\text{H}_{26}$  (10  $\mu\text{L}$ ) was added. The reaction mixture was stirred at 120 °C for 48 h and then diluted with 3 mL of EtOAc. Aliquots were taken from the organic phase, and passed through a short plug of silica gel with EtOAc washing (about 1.5 mL). The filtrate was subjected to GC analysis to determine the yield of the product **3a**.

**Table S1.** The effect of temperature.

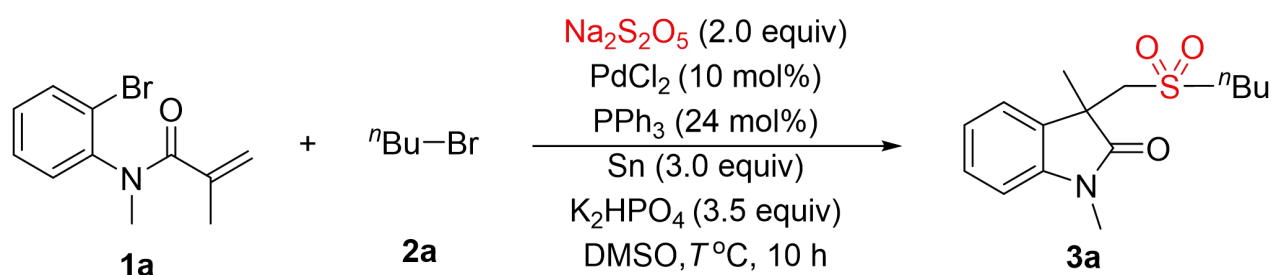

| Entry    | $T$        | Yield <b>3a</b> (%) |
|----------|------------|---------------------|
| 1        | 80         | 14                  |
| 2        | 100        | 24                  |
| 3        | 110        | 26                  |
| <b>4</b> | <b>120</b> | <b>34</b>           |
| 5        | 130        | 30                  |

**Table S2.** The effect of reaction time.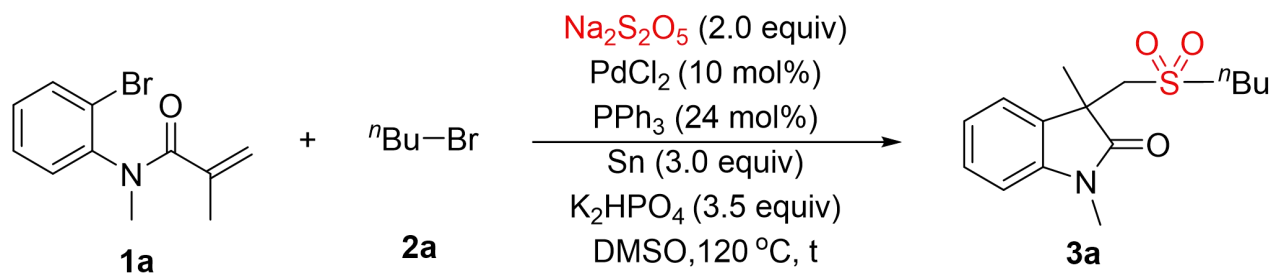

| Entry | t           | Yield <b>3a</b> (%) |
|-------|-------------|---------------------|
| 1     | 10 h        | 34                  |
| 2     | 24 h        | 38                  |
| 3     | <b>48 h</b> | <b>45</b>           |
| 4     | 72 h        | 46                  |

**Table S3.** The effect of reductive metal.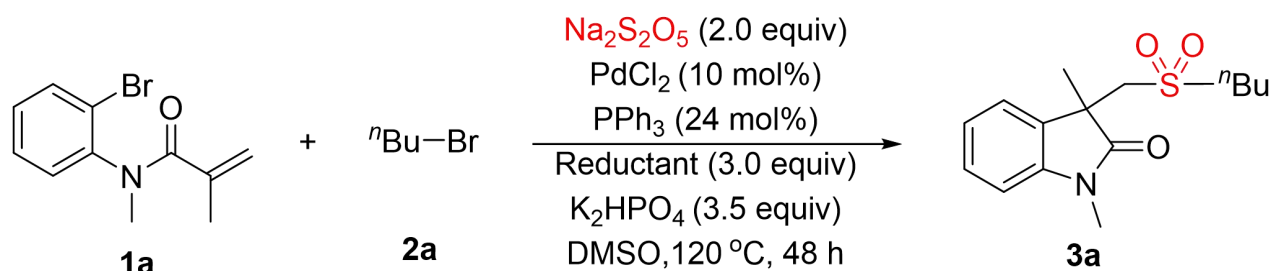

| Entry | Reductant | Yield <b>3a</b> (%) |
|-------|-----------|---------------------|
| 1     | Sn        | 45                  |
| 2     | <b>Zn</b> | <b>60</b>           |
| 3     | Mg        | 0                   |
| 4     | Mn        | 22                  |
| 5     | Fe        | 0                   |

**Table S4.** The effect of solvent.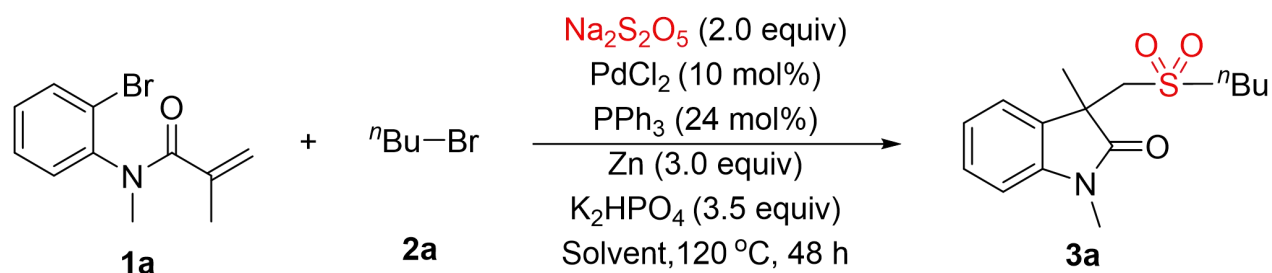

| Entry | Solvent | Yield <b>3a</b> (%) |
|-------|---------|---------------------|
| 1     | toluene | 0                   |

|          |             |           |
|----------|-------------|-----------|
| 2        | 1,4-dioxane | 10        |
| 3        | DCE         | 0         |
| 4        | DMF         | 54        |
| <b>5</b> | <b>DMSO</b> | <b>60</b> |
| 6        | DMA         | 51        |

**Table S5.** The effect of base.

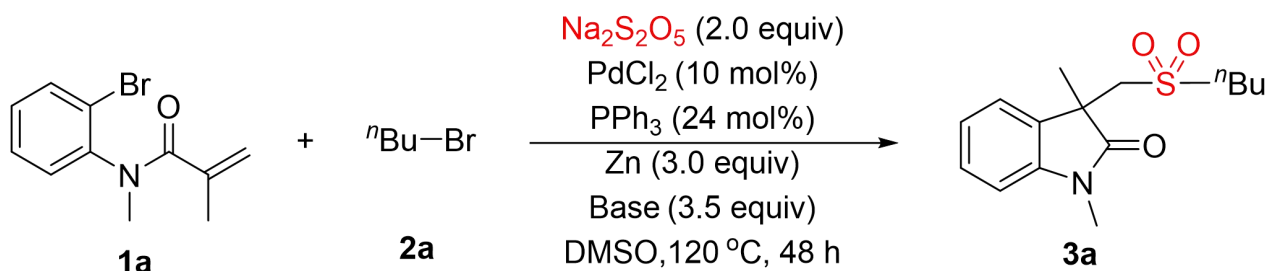

| Entry     | Base                                       | Yield <b>3a</b> (%) |
|-----------|--------------------------------------------|---------------------|
| 1         | $\text{K}_3\text{PO}_4$                    | 31                  |
| 2         | $\text{KH}_2\text{PO}_4$                   | 50                  |
| 3         | KOPh                                       | 45                  |
| 4         | $\text{K}_2\text{CO}_3$                    | 35                  |
| 5         | $\text{KHCO}_3$                            | 42                  |
| 6         | $\text{NaHCO}_3$                           | 47                  |
| 7         | DBU                                        | 55                  |
| 8         | $\text{Et}_3\text{N}$                      | 44                  |
| 9         | DIPEA                                      | 40                  |
| <b>10</b> | <b><math>\text{K}_2\text{HPO}_4</math></b> | <b>60</b>           |

**Table S6.** The effect of catalyst.

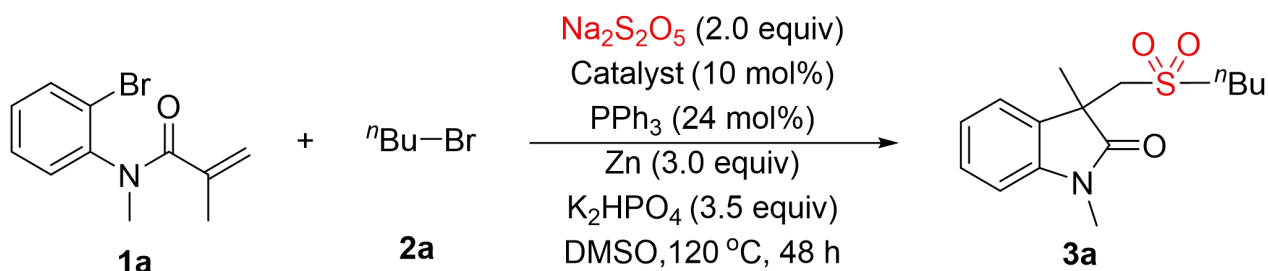

| Entry | Catalyst                  | Yield <b>3a</b> (%) |
|-------|---------------------------|---------------------|
| 1     | $\text{PdCl}_2$           | 60                  |
| 2     | $\text{Pd}(\text{OAc})_2$ | 56                  |



|          |                                           |           |
|----------|-------------------------------------------|-----------|
| 3        | Pd(dba) <sub>2</sub>                      | 65        |
| 4        | Pd(PPh <sub>3</sub> ) <sub>4</sub>        | 64        |
| 5        | Pd(dppf) <sub>2</sub> Cl <sub>2</sub>     | 50        |
| <b>6</b> | <b>Pd(MeCN)<sub>2</sub>Cl<sub>2</sub></b> | <b>75</b> |
| 7        | Ni(cod) <sub>2</sub>                      | 0         |

**Table S7.** The effect of sulfur dioxide source.

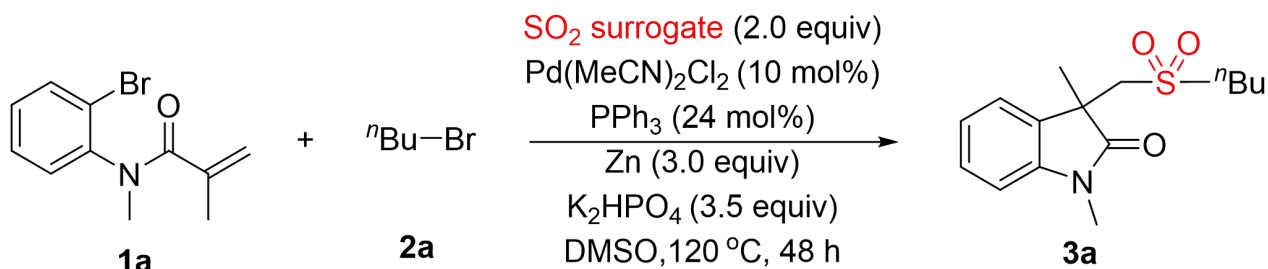

| Entry          | SO <sub>2</sub> surrogate                       | Yield <b>3a</b> (%) |
|----------------|-------------------------------------------------|---------------------|
| 1              | DABSO                                           | 72                  |
| 2              | K <sub>2</sub> S <sub>2</sub> O <sub>5</sub>    | 70                  |
| <b>3</b>       | <b>Na<sub>2</sub>S<sub>2</sub>O<sub>5</sub></b> | <b>75</b>           |
| 4 <sup>a</sup> | Na <sub>2</sub> S <sub>2</sub> O <sub>8</sub>   | 0                   |

<sup>a</sup> 0.9 equiv of **1a** was recovered.

**Table S8.** The effect of phase transfer catalyst.

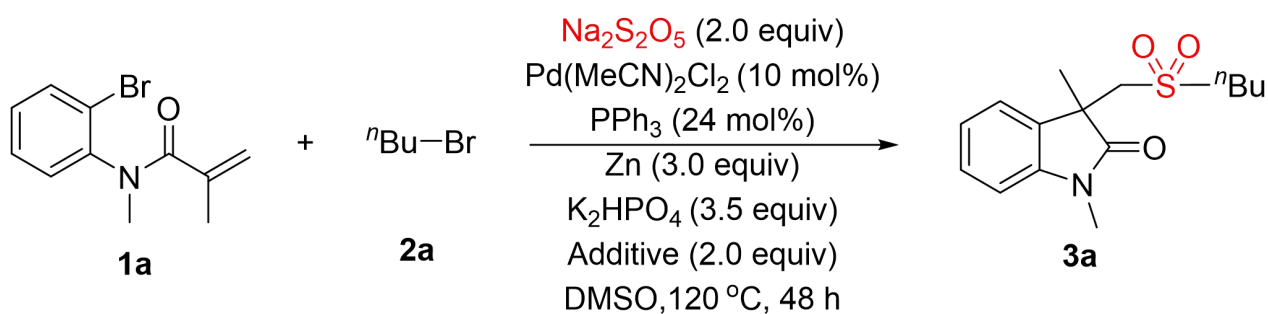

| Entry    | Additive            | Yield <b>3a</b> (%) |
|----------|---------------------|---------------------|
| 1        | Bu <sub>4</sub> NBr | 70                  |
| 2        | Bu <sub>4</sub> NCl | 68                  |
| 3        | Bu <sub>4</sub> NI  | 62                  |
| <b>4</b> | -                   | <b>75</b>           |

### III. General procedure for the palladium-catalyzed domino cyclization/alkylsulfonylation

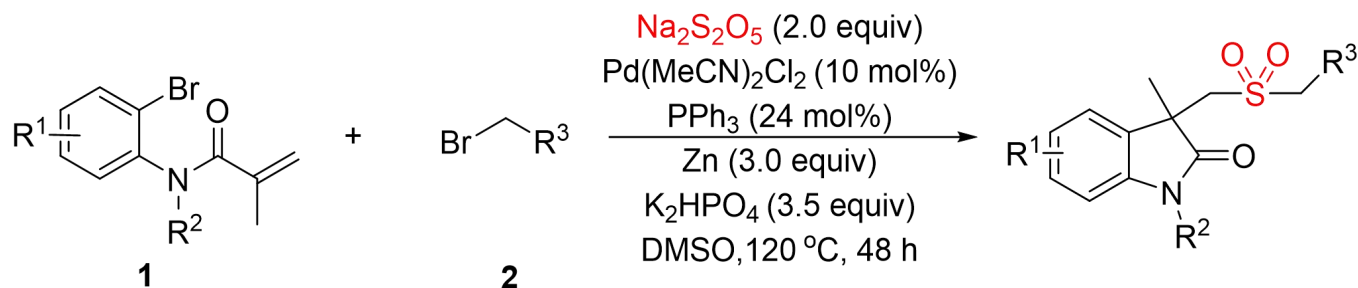

*A typical procedure:* In a nitrogen-filled glove box, compound **1** (0.2 mmol, 1.0 equiv),  $\text{Na}_2\text{S}_2\text{O}_5$  (76 mg, 0.4 mmol, 2.0 equiv),  $\text{Pd}(\text{MeCN})_2\text{Cl}_2$  (5.2 mg, 0.02 mmol, 10 mol%),  $\text{PPh}_3$  (12.6 mg, 0.048 mmol, 24 mol%), Zn dust (39.6 mg, 0.6 mmol, 3 equiv),  $\text{K}_2\text{HPO}_4$  (121.9 mg, 0.7 mmol, 3.5 equiv) and DMSO (1.0 mL) were added to a 10-mL Schlenk tube. After stirring at room temperature for 1 min, alkyl bromide **2** (0.6 mmol, 3.0 equiv) was added. The reaction mixture was stirred at 120 °C for 48 h. The reaction mixture was cooled to room temperature and then extracted with EtOAc. The solvent was removed under reduced pressure and the crude product was purified by flash chromatograph.

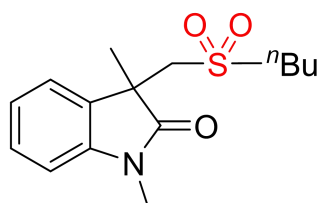

### 3-((Butylsulfonyl)methyl)-1,3-dimethylindolin-2-one (**3a**)<sup>[2]</sup>

The product was isolated by flash chromatography (Petroleum ether/EtOAc = 2:1, V/V) as white solid. 70% yield. M.p.: 70-72 °C.

$^1\text{H}$  NMR (400 MHz,  $\text{CDCl}_3$ ):  $\delta$  7.37-7.31 (m, 2H), 7.10 (t,  $J = 7.6$  Hz, 1H), 6.90 (d,  $J = 7.6$  Hz, 1H), 3.63 (d,  $J = 14.4$  Hz, 1H), 3.52 (d,  $J = 14.4$  Hz, 1H), 3.25 (s, 3H), 2.72-2.60 (m, 2H), 1.74-1.64 (m, 2H), 1.45 (s, 3H), 1.39-1.29 (m, 2H), 0.87 (t,  $J = 7.6$  Hz, 3H).

$^{13}\text{C}$  NMR (151 MHz,  $\text{CDCl}_3$ ):  $\delta$  178.1, 143.5, 130.4, 129.1, 123.7, 122.7, 108.9, 58.6, 55.1, 45.6, 26.8, 25.2, 23.8, 21.7, 13.6.

HRMS (ESI): calcd for  $\text{C}_{15}\text{H}_{21}\text{NNaO}_3\text{S}$  [ $\text{M}+\text{Na}^+$ ]: 318.1134, found 318.1126.

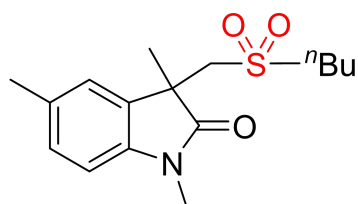

### 3-((Butylsulfonyl)methyl)-1,3,5-trimethylindolin-2-one (**3b**)

The product was isolated by flash chromatography (Petroleum ether/EtOAc = 2:1, V/V) as white solid. 87% yield. M.p.: 105-106 °C.

$^1\text{H}$  NMR (400 MHz,  $\text{CDCl}_3$ ):  $\delta$  7.17 (s, 1H), 7.13 (d,  $J = 8$  Hz, 1H), 6.79 (d,  $J = 8$  Hz, 1H), 3.61 (d,  $J = 14.4$  Hz, 1H), 3.50 (d,  $J = 14.4$  Hz, 1H), 3.23 (s, 3H), 2.73-2.59 (m, 2H), 2.35 (s, 3H), 1.73-1.64 (m, 2H), 1.44 (s, 3H), 1.39-1.29 (m, 2H), 0.88 (t,  $J = 7.2$  Hz, 3H).

$^{13}\text{C}$  NMR (101 MHz,  $\text{CDCl}_3$ ):  $\delta$  178.0, 141.1, 132.2, 130.5, 129.4, 124.4, 108.6, 58.6, 55.0, 45.7, 26.8, 25.2, 23.9, 21.7, 21.3, 13.6.

HRMS (ESI): calcd for  $\text{C}_{16}\text{H}_{24}\text{NO}_3\text{S}$  [ $\text{M}+\text{H}^+$ ]: 310.1471, found 310.1462.

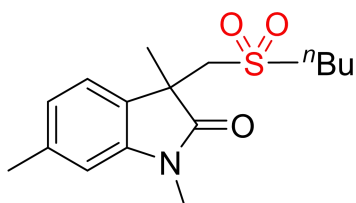

### 3-((Butylsulfonyl)methyl)-1,3,6-trimethylindolin-2-one (3c)

The product was isolated by flash chromatography (Petroleum ether/EtOAc =2:1, V/V) as white solid. 87% yield. M.p.: 72-73 °C.

$^1\text{H}$  NMR (400 MHz,  $\text{CDCl}_3$ ):  $\delta$  7.24 (d,  $J = 7.2$  Hz, 1H), 6.91 (d,  $J = 7.6$  Hz, 1H), 6.72 (s, 1H), 3.60 (d,  $J = 14.4$  Hz, 1H), 3.49 (d,  $J = 14.4$  Hz, 1H), 3.23 (s, 3H),  $\delta$  2.73-2.61 (m, 2H), 2.39 (s, 3H), 1.72-1.65 (m, 2H), 1.43 (s, 3H), 1.39-1.30 (m, 2H), 0.88 (t,  $J = 7.2$  Hz, 3H).

$^{13}\text{C}$  NMR (101 MHz,  $\text{CDCl}_3$ ):  $\delta$  178.4, 143.5, 139.3, 127.4, 123.4, 123.2, 109.8, 58.7, 55.0, 45.4, 26.7, 25.2, 23.8, 22.0, 21.7, 13.6.

HRMS (ESI): calcd for  $\text{C}_{16}\text{H}_{24}\text{NO}_3\text{S}$  [ $\text{M}+\text{H}^+$ ]: 310.1471, found 310.1462.

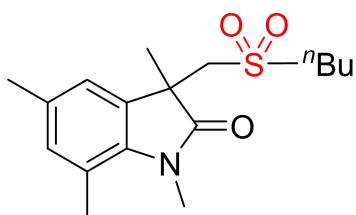

### 3-((Butylsulfonyl)methyl)-1,3,5,7-tetramethylindolin-2-one (3d)

The product was isolated by flash chromatography (Petroleum ether/EtOAc =2:1, V/V) as white solid. 90% yield. M.p.: 106-108 °C.

$^1\text{H}$  NMR (400 MHz,  $\text{CDCl}_3$ ):  $\delta$  6.96 (s, 1H), 6.86 (s, 1H), 3.60 (d,  $J = 14.8$  Hz, 1H), 3.50 (s, 3H), 3.46 (d,  $J = 14.8$  Hz, 1H), 2.71-2.56 (m, 2H), 2.54 (s, 3H), 2.29 (s, 3H), 1.76-1.62 (m, 2H), 1.40 (s, 3H), 1.38-1.28 (m, 2H), 0.88 (t,  $J = 7.2$  Hz, 3H).

$^{13}\text{C}$  NMR (101 MHz,  $\text{CDCl}_3$ ):  $\delta$  178.7, 138.9, 133.3, 132.0, 131.1, 122.0, 120.3, 58.9, 55.0, 45.1, 30.1, 25.7, 23.9, 21.7, 20.9, 19.1, 13.6.

HRMS (ESI): calcd for  $\text{C}_{17}\text{H}_{26}\text{NO}_3\text{S}$  [ $\text{M}+\text{H}^+$ ]: 324.1628, found 324.1615

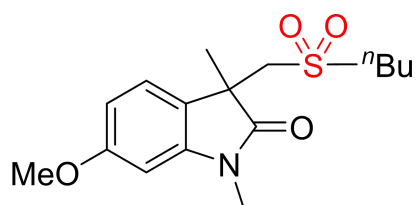

### 3-((Butylsulfonyl)methyl)-1,3-dimethyl-2-oxo-6-(oxo- $\lambda^6$ -methyl)indoline (3e)

The product was isolated by flash chromatography (Petroleum ether/EtOAc =2:1, V/V) as white solid. 73% yield. M.p.: 92-93 °C.

$^1\text{H}$  NMR (400 MHz,  $\text{CDCl}_3$ ):  $\delta$  7.27-7.25 (m, 1H), 6.60 (dd,  $J = 8.4, 2.4$  Hz, 1H), 6.47 (d,  $J = 2.4$  Hz, 1H), 3.83 (s, 3H), 3.50 (d,  $J = 14.4$  Hz, 1H), 3.48 (d,  $J = 14.4$  Hz, 1H), 3.23 (s, 3H), 2.74-2.62 (m, 2H), 1.73-1.65 (m, 2H), 1.43 (s, 3H), 1.40-1.31 (m, 2H), 0.88 (t,  $J = 7.6$  Hz, 3H).

$^{13}\text{C}$  NMR (101 MHz,  $\text{CDCl}_3$ ):  $\delta$  178.7, 160.9, 144.8, 124.4, 122.1, 106.6, 96.8, 58.7, 55.6, 55.1, 45.1, 26.8, 25.2, 23.8, 21.7, 13.6.

HRMS (ESI): calcd for  $\text{C}_{16}\text{H}_{24}\text{NO}_4\text{S}$  [ $\text{M}+\text{H}^+$ ]: 326.1421, found 326.1407

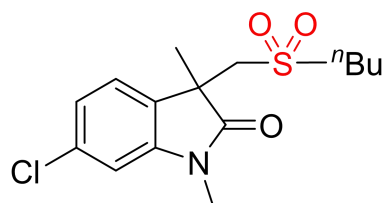

### 3-((Butylsulfonyl)methyl)-6-chloro-1,3-dimethylindolin-2-one (3f)

The product was isolated by flash chromatography (Petroleum ether/EtOAc =2:1, V/V) as white solid. 67 % yield. M.p.: 76-77 °C.

$^1\text{H}$  NMR (400 MHz,  $\text{CDCl}_3$ ):  $\delta$  7.29 (d,  $J = 8$  Hz, 1H), 7.07 (dd,  $J = 7.6, 1.6$  Hz, 1H), 6.89 (d,  $J = 1.6$  Hz, 1H), 3.62 (d,  $J = 14.4$  Hz, 1H), 3.50 (d,  $J = 14.4$  Hz, 1H), 3.23 (s, 3H), 2.82-2.70 (m, 2H), 1.74-1.67 (m, 2H), 1.43 (s, 3H), 1.40-1.33 (m, 2H), 0.89 (t,  $J = 7.6$  Hz, 3H).

$^{13}\text{C}$  NMR (101 MHz,  $\text{CDCl}_3$ )  $\delta$  178.1, 144.6, 134.9, 128.8, 124.8, 122.5, 109.6, 58.3, 55.3, 45.3, 26.8, 25.2, 23.8, 21.7, 13.6.

HRMS (ESI): calcd for  $\text{C}_{15}\text{H}_{21}\text{ClNO}_3\text{S}$  [ $\text{M}+\text{H}^+$ ]: 330.0925, found 330.0911

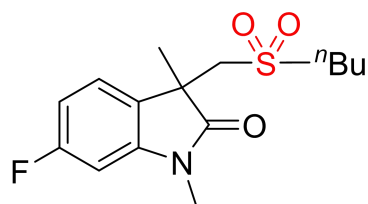

### 3-((Butylsulfonyl)methyl)-6-fluoro-1,3-dimethylindolin-2-one (3g)

The product was isolated by flash chromatography (Petroleum ether/EtOAc =2:1, V/V) as yellow oil. 80 % yield.

$^1\text{H}$  NMR (400 MHz,  $\text{CDCl}_3$ ):  $\delta$  7.30 (dd,  $J = 8, 5.2$  Hz, 1H), 6.80-6.75 (m, 1H), 6.63 (dd,  $J = 8.8, 2$  Hz, 1H),

3.62 (d,  $J = 14.4$  Hz, 1H), 3.50 (d,  $J = 14.4$  Hz, 1H), 3.23 (s, 3H), 2.80-2.68 (m, 2H), 1.74-1.66 (m, 2H), 1.43 (s, 3H), 1.40-1.33 (m, 2H), 0.89 (t,  $J = 7.2$  Hz, 3H).

$^{13}\text{C}$  NMR (101 MHz,  $\text{CDCl}_3$ ):  $\delta$  178.5, 163.5 (d,  $J = 247.0$  Hz), 145.1 (d,  $J = 11.7$  Hz), 125.7 (d,  $J = 3.1$  Hz), 124.9 (d,  $J = 9.8$  Hz), 108.8 (d,  $J = 22.6$  Hz), 97.8 (d,  $J = 27.7$  Hz), 58.4, 55.2, 45.2, 26.9, 25.2, 23.8, 21.7, 13.6.

$^{19}\text{F}$  NMR (377 MHz,  $\text{CDCl}_3$ ):  $\delta$  -110.9.

HRMS (ESI): calcd for  $\text{C}_{15}\text{H}_{21}\text{FNO}_3\text{S}$  [ $\text{M}+\text{H}^+$ ]: 314.1221, found 314.1207.

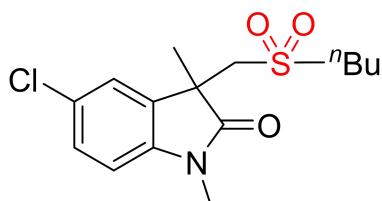

### 3-((Butylsulfonyl)methyl)-5-chloro-1,3-dimethylindolin-2-one (3h)

The product was isolated by flash chromatography (Petroleum ether/EtOAc =2:1, V/V) as white solid. 65% yield. M.p.: 101-103 °C.

$^1\text{H}$  NMR (400 MHz,  $\text{CDCl}_3$ ):  $\delta$  7.34 (d,  $J = 1.6$  Hz, 1H), 7.30 (dd,  $J = 8.4, 1.6$  Hz, 1H), 6.82 (d,  $J = 8.4$  Hz, 1H), 3.63 (d,  $J = 14.4$  Hz, 1H), 3.50 (d,  $J = 14.4$  Hz, 1H), 3.23 (s, 3H), 2.81-2.68 (m, 2H), 1.74-1.67 (m, 2H), 1.44 (s, 3H), 1.41-1.33 (m, 2H), 0.90 (t,  $J = 7.2$  Hz, 3H).

$^{13}\text{C}$  NMR (101 MHz,  $\text{CDCl}_3$ ):  $\delta$  177.6, 142.0, 132.2, 129.0, 128.1, 124.3, 109.8, 58.3, 55.3, 45.8, 26.9, 25.1, 23.9, 21.7, 13.6.

HRMS (ESI): calcd for  $\text{C}_{15}\text{H}_{20}\text{ClNNaO}_3\text{S}$  [ $\text{M}+\text{Na}^+$ ]: 352.0745, found 352.0762.

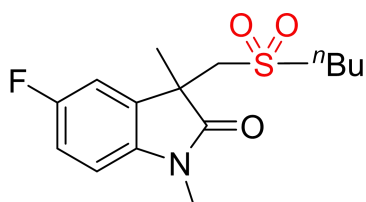

### 3-((Butylsulfonyl)methyl)-5-fluoro-1,3-dimethylindolin-2-one (3i)

The product was isolated by flash chromatography (Petroleum ether/EtOAc =2:1, V/V) as yellow oil. 76% yield.

$^1\text{H}$  NMR (400 MHz,  $\text{CDCl}_3$ ):  $\delta$  7.15 (dd,  $J = 7.6, 2.4$  Hz, 1H), 7.05-7.00 (m, 1H), 6.81 (dd,  $J = 8.4, 4$  Hz, 1H), 3.63 (d,  $J = 14.4$  Hz, 1H), 3.49 (d,  $J = 14.4$  Hz, 1H), 3.24 (s, 3H), 2.83-2.71 (m, 2H), 1.75-1.67 (m, 2H), 1.45 (s, 3H), 1.41-1.33 (m, 2H), 0.89 (t,  $J = 7.2$  Hz, 3H).

$^{13}\text{C}$  NMR (101 MHz,  $\text{CDCl}_3$ ):  $\delta$  177.8, 159.3 (d,  $J = 242.2$  Hz), 139.3 (d,  $J = 1.9$  Hz), 132.1 (d,  $J = 8.0$  Hz), 115.3 (d,  $J = 23.4$  Hz), 112.1 (d,  $J = 25.0$  Hz), 109.3 (d,  $J = 8.3$  Hz), 58.2, 55.2, 46.0, 26.9, 25.1, 23.8, 21.7, 13.6.

$^{19}\text{F}$  NMR (377 MHz,  $\text{CDCl}_3$ ):  $\delta$  -120.0.

HRMS (ESI): calcd for  $\text{C}_{15}\text{H}_{21}\text{FNO}_3\text{S}$  [ $\text{M}+\text{H}^+$ ]: 314.1221, found 314.1208.

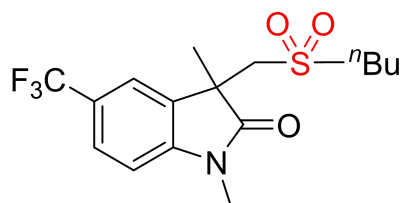

### 3-((Butylsulfonyl)methyl)-1,3-dimethyl-5-(trifluoromethyl)indolin-2-one (3j)

The product was isolated by flash chromatography (Petroleum ether/EtOAc =3:1, V/V) as yellow oil. 62% yield.

$^1\text{H}$  NMR (400 MHz,  $\text{CDCl}_3$ ):  $\delta$  7.63-7.60 (m, 2H), 6.97 (d,  $J = 8$  Hz, 1H), 3.67 (d,  $J = 14.4$  Hz, 1H), 3.56 (d,  $J = 14.4$  Hz, 1H), 3.28 (s, 3H), 2.78-2.66 (m, 2H), 1.73-1.65 (m, 2H), 1.47 (s, 3H), 1.40-1.31 (m, 2H), 0.88 (t,  $J = 7.2$  Hz, 3H).

$^{13}\text{C}$  NMR (101 MHz,  $\text{CDCl}_3$ ):  $\delta$  177.8, 146.4, 131.0, 126.7 (q,  $J = 4.04$  Hz), 124.8 (q,  $J = 33.0$  Hz), 124.3 (q,  $J = 407.9$  Hz), 120.8 (q,  $J = 3.7$  Hz), 108.6, 58.2, 55.2, 45.4, 26.9, 25.0, 23.7, 21.6, 13.4.

$^{19}\text{F}$  NMR (377 MHz,  $\text{CDCl}_3$ ):  $\delta$  -61.4.

HRMS (ESI): calcd for  $\text{C}_{16}\text{H}_{21}\text{F}_3\text{NO}_3\text{S}$  [ $\text{M}+\text{H}^+$ ]: 364.1189, found 364.1178.

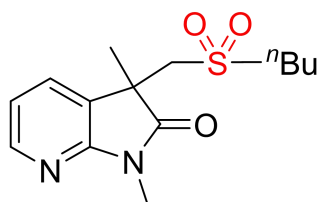

### 3-((Butylsulfonyl)methyl)-1,3-dimethyl-1,3-dihydro-2H-pyrrolo[2,3-b]pyridin-2-one (3k)

The product was isolated by flash chromatography (Petroleum ether/EtOAc =1:1, V/V) as yellow oil. 48% yield.

$^1\text{H}$  NMR (400 MHz,  $\text{CDCl}_3$ ):  $\delta$  8.23 (dd,  $J = 5.2, 0.8$  Hz, 1H), 7.69-7.67 (m, 1H), 7.01 (dd,  $J = 7.2, 5.6$  Hz, 1H), 3.61 (d,  $J = 14.0$  Hz, 1H), 3.52 (d,  $J = 14.4$  Hz, 1H), 3.33 (s, 3H), 2.92-2.80 (m, 2H), 1.77-1.70 (m, 2H), 1.50 (s, 3H), 1.45-1.36 (m, 2H), 0.91 (t,  $J = 7.2$  Hz, 3H).

$^{13}\text{C}$  NMR (101 MHz,  $\text{CDCl}_3$ ):  $\delta$  177.9, 156.5, 147.8, 131.9, 125.2, 118.4, 57.7, 55.4, 45.3, 25.9, 24.5, 23.8, 21.7, 13.6.

HRMS (ESI): calcd for  $\text{C}_{14}\text{H}_{20}\text{N}_2\text{NaO}_3\text{S}$  [ $\text{M}+\text{Na}^+$ ]: 319.1087, found 319.1077.

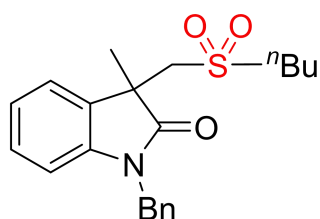

### 1-Benzyl-3-((butylsulfonyl)methyl)-3-methylindolin-2-one (3l)

The product was isolated by flash chromatography (Petroleum ether/EtOAc =1:1, V/V) as yellow oil. 57% yield.

$^1\text{H}$  NMR (400 MHz,  $\text{CDCl}_3$ ):  $\delta$  7.38 (d,  $J = 7.6$  Hz, 1H), 7.36-7.24 (m, 5H), 7.22-7.18 (m, 1H), 7.09-7.05 (m, 1H), 6.75 (d,  $J = 7.6$  Hz, 1H), 5.05 (d,  $J = 16.0$  Hz, 1H), 4.87 (d,  $J = 16.0$  Hz, 1H), 3.70 (d,  $J = 14.4$  Hz, 1H), 3.57 (d,  $J = 14.4$  Hz, 1H), 2.77-2.66 (m, 2H), 1.75-1.67 (m, 2H), 1.52 (s, 3H), 1.39-1.30 (m, 2H), 0.88 (t,  $J = 7.6$  Hz, 3H).

$^{13}\text{C}$  NMR (101 MHz,  $\text{CDCl}_3$ ):  $\delta$  178.2, 142.5, 135.8, 130.5, 128.9, 127.7, 127.4, 123.7, 122.7, 110.0, 58.4, 55.1, 45.7, 44.3, 25.8, 23.8, 21.7, 13.6.

HRMS (ESI): calcd for  $\text{C}_{21}\text{H}_{26}\text{NO}_3\text{S}$  [ $\text{M}+\text{H}^+$ ]: 372.1628, found 372.1622.

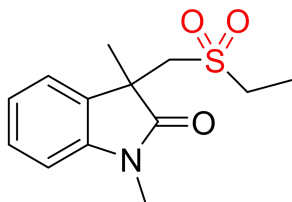

### 3-((Ethylsulfonyl)methyl)-1,3-dimethylindolin-2-one (4a)<sup>[3]</sup>

The product was isolated by flash chromatography (Petroleum ether/EtOAc =1:1, V/V) as yellow oil. 62% yield.

$^1\text{H}$  NMR (400 MHz,  $\text{CDCl}_3$ ):  $\delta$  7.35 (dd,  $J = 16, 7.6$  Hz, 2H), 7.11 (t,  $J = 7.6$  Hz, 1H), 6.90 (d,  $J = 8$  Hz, 1H), 3.63 (d,  $J = 14.4$  Hz, 1H), 3.52 (d,  $J = 14.4$  Hz, 1H), 3.26 (s, 3H), 2.78-2.60 (m, 2H), 1.45 (s, 3H), 1.27 (t,  $J = 7.6$  Hz, 3H).

$^{13}\text{C}$  NMR (101 MHz,  $\text{CDCl}_3$ ):  $\delta$  178.0, 143.4, 130.4, 129.1, 123.6, 122.7, 108.9, 57.8, 49.6, 45.6, 26.7, 25.2, 6.5.

HRMS (ESI): calcd for  $\text{C}_{13}\text{H}_{18}\text{NO}_3\text{S}$  [ $\text{M}+\text{H}^+$ ]: 268.1002, found 268.0991.

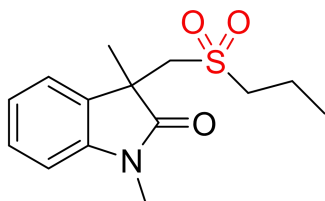

### 1,3-Dimethyl-3-((propylsulfonyl)methyl)indolin-2-one (4b)

The product was isolated by flash chromatography (Petroleum ether/EtOAc =1:1, V/V) as white solid. 64% yield. M.p.: 106-108 °C.

$^1\text{H}$  NMR (400 MHz,  $\text{CDCl}_3$ ):  $\delta$  7.37-7.32 (m, 2H), 7.10 (t,  $J = 7.6$  Hz, 1H), 6.90 (d,  $J = 7.6$  Hz, 1H), 3.62 (d,  $J = 14.4$  Hz, 1H), 3.52 (d,  $J = 14.4$  Hz, 1H), 3.25 (s, 3H), 2.71-2.58 (m, 2H), 1.79-1.69 (m, 2H), 1.45 (s, 3H), 0.96 (t,  $J = 7.6$  Hz, 3H).

$^{13}\text{C}$  NMR (101 MHz,  $\text{CDCl}_3$ ):  $\delta$  178.0, 143.5, 130.4, 129.1, 123.6, 122.7, 108.9, 58.6, 57.0, 45.6, 26.7, 25.1, 15.8, 13.1.

HRMS (ESI): calcd for  $\text{C}_{14}\text{H}_{20}\text{NO}_3\text{S}$  [ $\text{M}+\text{H}^+$ ]: 282.1156, found 282.1151.

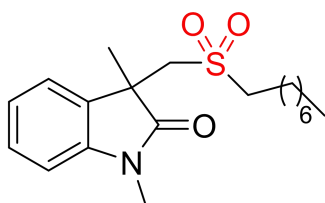

### 1,3-Dimethyl-3-((octylsulfonyl)methyl)indolin-2-one (4c)

The product was isolated by flash chromatography (Petroleum ether/EtOAc =2:1, V/V) as white solid. 64% yield. M.p.: 68-70 °C.

$^1\text{H NMR}$  (400 MHz,  $\text{CDCl}_3$ ):  $\delta$  7.36-7.31 (m, 2H), 7.12-7.08 (m, 1H), 6.90 (d,  $J = 8.0$  Hz, 1H), 3.63 (d,  $J = 14.4$  Hz, 1H), 3.52 (d,  $J = 14.4$  Hz, 1H), 3.25 (s, 3H), 2.70-2.58 (m, 2H), 1.72-1.64 (m, 2H), 1.45 (s, 3H), 1.27-1.20 (m, 10H), 0.86 (t,  $J = 6.8$  Hz, 3H).

$^{13}\text{C NMR}$  (101 MHz,  $\text{CDCl}_3$ ):  $\delta$  178.0, 143.5, 130.4, 129.1, 123.7, 122.6, 108.9, 58.6, 55.3, 45.6, 31.8, 29.0, 28.4, 26.7, 25.1, 22.7, 21.8, 14.2.

HRMS (ESI): calcd for  $\text{C}_{19}\text{H}_{30}\text{NO}_3\text{S}$  [ $\text{M}+\text{H}^+$ ]: 352.1941, found 352.1928.

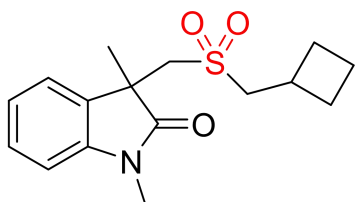

### 3-(((Cyclobutylmethyl)sulfonyl)methyl)-1,3-dimethylindolin-2-one (4d)

The product was isolated by flash chromatography (Petroleum ether/EtOAc =2:1, V / V) as white solid. 65% yield. M.p.: 102-103 °C.

$^1\text{H NMR}$  (400 MHz,  $\text{CDCl}_3$ ):  $\delta$  7.38-7.31 (m, 2H), 7.10 (t,  $J = 7.2$  Hz, 1H), 6.89 (d,  $J = 8.0$  Hz, 1H), 3.56 (d,  $J = 14.4$  Hz, 1H), 3.47 (d,  $J = 14.4$  Hz, 1H), 3.25 (s, 3H), 2.84-2.82 (m, 2H), 2.81-2.73 (m, 1H), 2.18-2.11 (m, 2H), 1.99-1.87 (m, 1H), 1.85-1.74 (m, 3H), 1.44 (s, 3H).

$^{13}\text{C NMR}$  (101 MHz,  $\text{CDCl}_3$ ):  $\delta$  178.1, 143.4, 130.5, 129.0, 123.8, 122.7, 108.8, 61.1, 59.3, 45.6, 29.2, 28.7, 28.6, 26.7, 25.1, 19.4.

HRMS (ESI): calcd for  $\text{C}_{16}\text{H}_{22}\text{NO}_3\text{S}$  [ $\text{M}+\text{H}^+$ ]: 308.1315, found 308.1302.

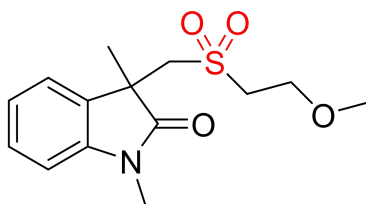

### 3-(((2-Methoxyethyl)sulfonyl)methyl)-1,3-dimethylindolin-2-one (4e)

The product was isolated by flash chromatography (Petroleum ether/EtOAc =1:1, V/V) as yellow oil. 62% yield.

$^1\text{H NMR}$  (400 MHz,  $\text{CDCl}_3$ ):  $\delta$  7.39-7.31 (m, 2H), 7.10 (t,  $J = 7.6$  Hz, 1H), 6.89 (d,  $J = 7.6$  Hz, 1H), 3.78-3.64



(m, 4H), 3.39 (s, 3H), 3.25 (s, 3H), 2.88 (t,  $J = 5.2$  Hz, 2H), 1.44 (s, 3H).

$^{13}\text{C}$  NMR (101 MHz,  $\text{CDCl}_3$ ):  $\delta$  178.3, 143.6, 130.3, 129.0, 124.1, 122.5, 108.8, 66.3, 60.8, 59.2, 55.5, 45.7, 26.7, 25.2.

HRMS (ESI): calcd for  $\text{C}_{14}\text{H}_{20}\text{NO}_4\text{S}$  [ $\text{M}+\text{H}^+$ ]: 298.1108, found 298.1098.

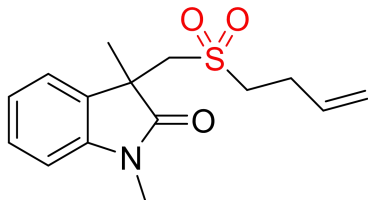

### 3-((But-3-en-1-ylsulfonyl)methyl)-1,3-dimethylindolin-2-one (4f)

The product was isolated by flash chromatography (Petroleum ether/EtOAc =2:1, V/V) as white solid. 60% yield. M.p.: 90-91 °C.

$^1\text{H}$  NMR (400 MHz,  $\text{CDCl}_3$ ):  $\delta$  7.37-7.32 (m, 2H), 7.11 (t,  $J = 7.6$  Hz, 1H), 6.91 (d,  $J = 8$  Hz, 1H), 5.76-5.66 (m, 1H), 5.09-5.04 (m, 2H), 3.66 (d,  $J = 14.4$  Hz, 1H), 3.55 (d,  $J = 14.8$  Hz, 1H), 3.26 (s, 3H), 2.82-2.69 (m, 2H), 2.49-2.43 (m, 2H), 1.46 (s, 3H).

$^{13}\text{C}$  NMR (101 MHz,  $\text{CDCl}_3$ ):  $\delta$  178.0, 145.9, 143.5, 135.7, 133.9, 130.4, 129.2, 123.7, 122.7, 117.5, 108.9, 59.0, 54.4, 45.6, 26.8, 26.0, 25.2.

HRMS (ESI): calcd for  $\text{C}_{15}\text{H}_{20}\text{NO}_3\text{S}$  [ $\text{M}+\text{H}^+$ ]; 294.1158, found 294.1147.

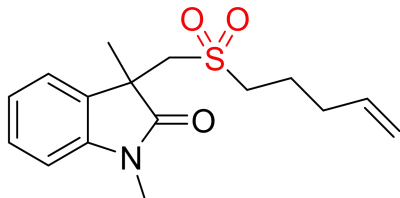

### 1,3-Dimethyl-3-((pent-4-en-1-ylsulfonyl)methyl)indolin-2-one (4g)

The product was isolated by flash chromatography (Petroleum ether/EtOAc =2:1, V/V) as white solid. 62% yield. M.p.: 93-94 °C.

$^1\text{H}$  NMR (400 MHz,  $\text{CDCl}_3$ ):  $\delta$  7.36-7.32 (m, 2H), 7.10 (t,  $J = 7.6$  Hz, 1H), 6.90 (d,  $J = 7.6$  Hz, 1H), 5.71-5.61 (m, 1H), 5.01-4.97 (m, 2H), 3.63 (d,  $J = 14.8$  Hz, 1H), 3.52 (d,  $J = 14.8$  Hz, 1H), 3.25 (s, 3H), 2.71-2.58 (m, 2H), 2.10-2.01 (m, 2H), 1.88-1.75 (m, 2H), 1.45 (s, 3H).

$^{13}\text{C}$  NMR (101 MHz,  $\text{CDCl}_3$ ):  $\delta$  178.0, 143.4, 136.3, 130.3, 129.1, 123.7, 122.7, 116.7, 108.9, 58.8, 54.5, 45.6, 32.1, 26.7, 25.1, 20.9.

HRMS (ESI): calcd for  $\text{C}_{16}\text{H}_{22}\text{NO}_3\text{S}$  [ $\text{M}+\text{H}^+$ ]: 308.1315, found 308.1308.

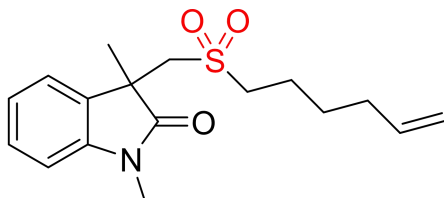

### 3-((Hex-5-en-1-ylsulfonyl)methyl)-1,3-dimethylindolin-2-one (4h)

The product was isolated by flash chromatography (Petroleum ether/EtOAc =1:1, V/V) as yellow oil. 65% yield.

$^1\text{H}$  NMR (400 MHz,  $\text{CDCl}_3$ ):  $\delta$  7.37-7.32 (m, 2H), 7.13-7.09 (m, 1H), 6.90 (d,  $J = 8$  Hz, 1H), 5.78-5.68 (m, 1H), 5.02-4.95 (m, 2H), 3.62 (d,  $J = 14.8$  Hz, 1H), 3.52 (d,  $J = 14.8$  Hz, 1H), 3.26 (s, 3H), 2.73-2.61 (m, 2H), 2.04-1.99 (m, 2H), 1.76-1.70 (m, 2H), 1.45 (s, 3H), 1.43-1.37 (m, 2H).

$^{13}\text{C}$  NMR (151 MHz,  $\text{CDCl}_3$ ):  $\delta$  178.0, 143.5, 137.6, 130.4, 129.1, 123.6, 122.7, 115.5, 108.9, 58.7, 55.1, 45.6, 33.1, 27.6, 26.8, 25.1, 21.3.

HRMS (ESI): calcd for  $\text{C}_{17}\text{H}_{24}\text{NO}_3\text{S}$  [ $\text{M}+\text{H}^+$ ]: 322.1471, found 322.1460.

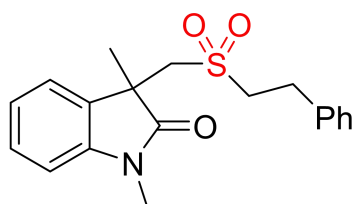

### 1,3-Dimethyl-3-((phenethylsulfonyl)methyl)indolin-2-one (4i)

The product was isolated by flash chromatography (Petroleum ether/EtOAc =3:1, V/V) as white solid. 73% yield. M.p.: 125-126 °C.

$^1\text{H}$  NMR (400 MHz,  $\text{CDCl}_3$ ):  $\delta$  7.37-7.22 (m, 5H), 7.14-7.09 (m, 3H), 6.91 (d,  $J = 8$  Hz, 1H), 3.61 (d,  $J = 14.4$  Hz, 1H), 3.46 (d,  $J = 14.8$  Hz, 1H), 3.26 (s, 3H), 3.04-2.94 (m, 4H), 1.44 (s, 3H).

$^{13}\text{C}$  NMR (101 MHz,  $\text{CDCl}_3$ ):  $\delta$  178.0, 143.5, 137.6, 130.3, 129.2, 129.0, 128.6, 127.1, 123.7, 122.7, 109.0, 59.0, 56.6, 45.6, 28.0, 26.8, 25.1.

HRMS (ESI): calcd for  $\text{C}_{19}\text{H}_{22}\text{NO}_3\text{S}$  [ $\text{M}+\text{H}^+$ ]: 344.1315, found 344.1305.

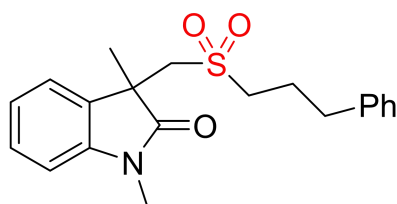

### 1,3-Dimethyl-3-(((3-phenylpropyl)sulfonyl)methyl)indolin-2-one (4j)

The product was isolated by flash chromatography ((Petroleum ether/EtOAc = 2:1, V/V) as yellow oil. 85% yield.

$^1\text{H}$  NMR (400 MHz,  $\text{CDCl}_3$ ):  $\delta$  7.34-7.26 (m, 4H), 7.32-7.20 (m, 1H), 7.12-7.10 (m, 2H), 7.08-7.04 (m, 1H), 6.88 (d,  $J = 8$  Hz, 1H), 3.61 (d,  $J = 14.4$  Hz, 1H), 3.49 (d,  $J = 14.4$  Hz, 1H), 3.23 (s, 3H), 2.71-2.58 (m, 4H), 2.10-1.98 (m, 2H), 1.43 (s, 3H).

$^{13}\text{C}$  NMR (101 MHz,  $\text{CDCl}_3$ ):  $\delta$  178.0, 143.4, 139.9, 130.3, 129.1, 128.8, 128.5, 126.6, 123.6, 122.7, 108.9, 55.8, 54.4, 45.6, 34.2, 26.7, 25.1, 23.4.

HRMS (ESI): calcd for  $\text{C}_{20}\text{H}_{24}\text{NO}_3\text{S}$  [ $\text{M}+\text{H}^+$ ]: 358.1471, found 358.1466.

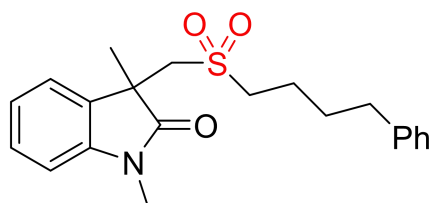

### 1,3-Dimethyl-3-(((4-phenylbutyl)sulfonyl)methyl)indolin-2-one (4k)

The product was isolated by flash chromatography (Petroleum ether/EtOAc =2:1, V/V) as yellow oil. 80% yield.

<sup>1</sup>H NMR (400 MHz, CDCl<sub>3</sub>): δ 7.35-7.26 (m, 4H), 7.21-7.17 (m, 1H), 7.14-7.07 (m, 3H), 6.90 (d, *J* = 8 Hz, 1H), 3.62 (d, *J* = 14.8 Hz, 1H), 3.50 (d, *J* = 14.4 Hz, 1H), 3.25 (s, 3H), 2.73-2.52 (m, 4H), 1.77-1.60 (m, 4H), 1.44 (s, 3H).

<sup>13</sup>C NMR (101 MHz, CDCl<sub>3</sub>): δ 178.0, 143.5, 141.3, 129.1, 128.5, 128.4, 126.2, 123.6, 122.7, 108.9, 58.7, 55.0, 45.5, 35.3, 30.1, 26.7, 25.1, 21.4.

HRMS (ESI): calcd for C<sub>21</sub>H<sub>26</sub>NO<sub>3</sub>S [M+H<sup>+</sup>]: 372.1628, found 372.1629.

### IV. General procedure for the palladium-catalyzed domino cyclization/aminosulfonylation

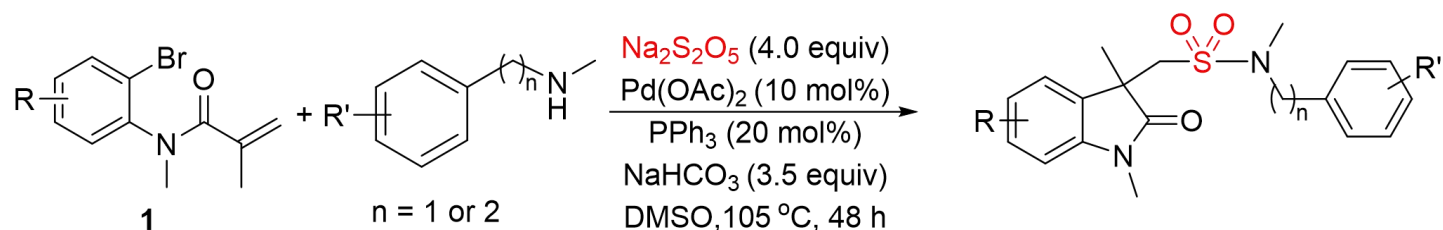

*A typical procedure:* In a nitrogen-filled glove box, compound **1** (0.2 mmol, 1.0 equiv), amine (0.52 mmol, 2.6 equiv), Na<sub>2</sub>S<sub>2</sub>O<sub>5</sub> (152 mg, 0.4 mmol, 4.0 equiv), Pd(OAc)<sub>2</sub> (4.5 mg, 0.02 mmol, 10 mol%), PPh<sub>3</sub> (10.5 mg, 0.04 mmol, 20 mol%), NaHCO<sub>3</sub> (58.8 mg, 0.7 mmol, 3.5 equiv) and DMSO (1.0 mL) were added to a 10-mL Schlenk tube. The reaction mixture was stirred at 105 °C for 48 h. The reaction mixture was cooled to room temperature and then extracted with EtOAc. The solvent was removed under reduced pressure and the crude product was purified by flash chromatograph.

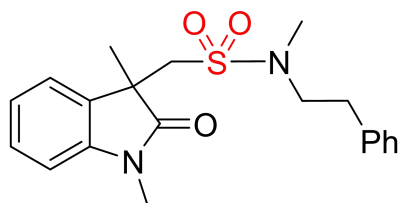

### 1-(1,3-Dimethyl-2-oxindolin-3-yl)-N-methyl-N-phenethylmethanesulfonamide (6a)<sup>[4]</sup>

The product was isolated by flash chromatography (petroleum ether/EtOAc = 2/1, v/v) as colorless oil. 86% yield.

<sup>1</sup>H NMR (400 MHz, CDCl<sub>3</sub>): δ 7.35-7.16 (m, 7H), 7.10 (td, *J* = 7.2, 1.2 Hz, 1H), 6.86 (d, *J* = 7.6 Hz, 1H), 3.38 (d, *J* = 14.4 Hz, 1H), 3.26-3.16 (m, 6H), 2.80 (t, *J* = 7.6 Hz, 2H), 2.68 (s, 3H), 1.37 (s, 3H).

$^{13}\text{C}$  NMR (101 MHz,  $\text{CDCl}_3$ ):  $\delta$  178.0, 141.8, 138.4, 132.3, 129.1, 128.8, 128.7, 128.1, 126.8, 124.8, 109.5, 55.7, 51.4, 45.9, 34.9, 34.4, 26.8, 24.9.

HRMS (ESI): Calcd for  $\text{C}_{20}\text{H}_{24}\text{N}_2\text{NaO}_3\text{S}$   $[\text{M}+\text{Na}]^+$  395.1405. Found: 395.1396.

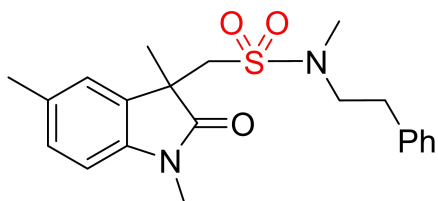

***N*-Methyl-*N*-phenethyl-1-(1,3,5-trimethyl-2-oxindolin-3-yl)methanesulfonamide (6b)<sup>[4]</sup>**

The product was isolated by flash chromatography (petroleum ether/EtOAc = 2/1, v/v) as colorless oil. 82% yield.

$^1\text{H}$  NMR (400 MHz,  $\text{CDCl}_3$ ):  $\delta$  7.31-7.27 (m, 2H), 7.24-7.20 (m, 1H), 7.18-7.16 (m, 3H), 7.09 (d,  $J$  = 8.0 Hz, 1H), 6.75 (d,  $J$  = 8.0 Hz, 1H), 3.40 (d,  $J$  = 14.4 Hz, 1H), 3.25-3.17 (m, 3H), 3.20 (s, 3H), 2.80 (t,  $J$  = 7.6 Hz, 2H), 2.67 (s, 3H), 2.36 (s, 3H), 1.36 (s, 3H).

$^{13}\text{C}$  NMR (101 MHz,  $\text{CDCl}_3$ ):  $\delta$  178.3, 140.8, 138.5, 132.1, 130.7, 129.0, 128.7, 126.7, 125.1, 108.3, 55.8, 51.4, 45.8, 35.0, 34.4, 26.7, 25.1, 21.3.

HRMS (ESI): Calcd for  $\text{C}_{21}\text{H}_{27}\text{N}_2\text{O}_3\text{S}$   $[\text{M}+\text{H}]^+$  387.1742. Found: 387.1750.

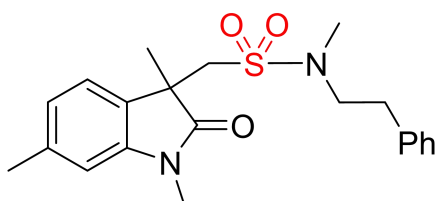

***N*-Methyl-*N*-phenethyl-1-(1,3,6-trimethyl-2-oxindolin-3-yl)methanesulfonamide (6c)<sup>[4]</sup>**

The product was isolated by flash chromatography (petroleum ether/EtOAc = 2/1, v/v) as colorless oil. 76% yield.

$^1\text{H}$  NMR (400 MHz,  $\text{CDCl}_3$ ):  $\delta$  7.31-7.27 (m, 2H), 7.24-7.20 (m, 2H), 7.18-7.16 (m, 2H), 6.91 (d,  $J$  = 7.6 Hz, 1H), 6.69 (s, 1H), 3.37 (d,  $J$  = 14.4 Hz, 1H), 3.25-3.14 (m, 3H), 3.21 (s, 3H), 2.80 (t,  $J$  = 7.6 Hz, 2H), 2.69 (s, 3H), 2.37 (s, 3H), 1.35 (s, 3H).

$^{13}\text{C}$  NMR (101 MHz,  $\text{CDCl}_3$ ):  $\delta$  178.7, 143.3, 138.9, 138.4, 129.0, 128.7, 127.6, 126.7, 124.0, 123.2, 109.5, 55.8, 51.3, 45.5, 35.0, 34.4, 26.6, 25.0, 22.0.

HRMS (ESI): Calcd for  $\text{C}_{21}\text{H}_{26}\text{N}_2\text{NaO}_3\text{S}$   $[\text{M}+\text{Na}]^+$  409.1562. Found: 409.1573.

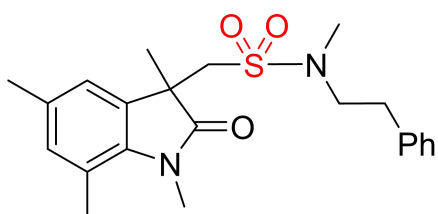

***N*-Methyl-*N*-phenethyl-1-(1,3,5,7-tetramethyl-2-oxindolin-3-yl)methanesulfonamide (6d)**

The product was isolated by flash chromatography (petroleum ether/EtOAc = 2/1, v/v) as colorless oil. 82% yield.

$^1\text{H NMR}$  (400 MHz,  $\text{CDCl}_3$ ):  $\delta$  7.31-7.28 (m, 2H), 7.24-7.20 (m, 1H), 7.17 (d,  $J = 7.6$  Hz, 2H), 6.95 (s, 1H), 6.81 (s, 1H), 3.47 (s, 3H), 3.43 (d,  $J = 14.4$  Hz, 1H), 3.20-3.15 (m, 3H), 2.80 (t,  $J = 8.0$  Hz, 2H), 2.67 (s, 3H), 2.49 (s, 3H), 2.30 (s, 3H), 1.32 (s, 3H).

$^{13}\text{C NMR}$  (101 MHz,  $\text{CDCl}_3$ ):  $\delta$  179.0, 138.6, 138.5, 133.0, 131.9, 131.3, 129.0, 128.7, 126.7, 122.6, 119.9, 56.2, 51.3, 45.2, 35.1, 34.4, 30.1, 25.7, 21.0, 19.0.

HRMS (ESI): Calcd for  $\text{C}_{22}\text{H}_{29}\text{N}_2\text{O}_3\text{S}$   $[\text{M}+\text{H}]^+$  401.1899. Found: 401.1897.

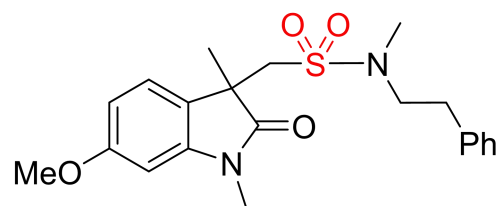

#### 1-(6-Methoxy-1,3-dimethyl-2-oxoindolin-3-yl)-N-methyl-N-phenethylmethanesulfonamide (6e)

The product was isolated by flash chromatography (petroleum ether/EtOAc = 2/1, v/v) as colorless oil. 74% yield.

$^1\text{H NMR}$  (600 MHz,  $\text{CDCl}_3$ ):  $\delta$  7.29 (t,  $J = 7.2$  Hz, 2H), 7.25-7.21 (m, 2H), 7.17 (d,  $J = 7.2$  Hz, 2H), 6.60 (dd,  $J = 7.8, 1.8$  Hz, 1H), 6.43 (d,  $J = 2.4$  Hz, 1H), 3.81 (s, 3H), 3.34 (d,  $J = 14.4$  Hz, 1H), 3.28-3.19 (m, 2H), 3.20 (s, 3H), 3.14 (d,  $J = 14.4$  Hz, 1H), 2.81 (t,  $J = 7.2$  Hz, 2H), 2.70 (s, 3H), 1.35 (s, 3H).

$^{13}\text{C NMR}$  (151 MHz,  $\text{CDCl}_3$ )  $\delta$  179.0, 160.6, 144.5, 138.5, 129.0, 128.7, 126.7, 125.0, 122.5, 106.5, 96.6, 55.9, 55.6, 51.4, 45.3, 35.1, 34.5, 26.7, 25.1.

HRMS (ESI): Calcd for  $\text{C}_{21}\text{H}_{27}\text{N}_2\text{O}_4\text{S}$   $[\text{M}+\text{H}]^+$  403.1692. Found: 403.1699.

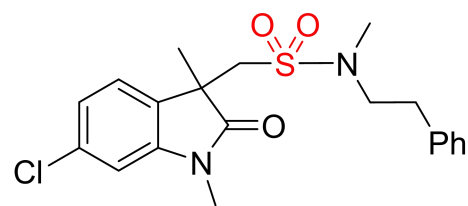

#### 1-(6-Chloro-1,3-dimethyl-2-oxoindolin-3-yl)-N-methyl-N-phenethylmethanesulfonamide (6f)<sup>[4]</sup>

The product was isolated by flash chromatography (petroleum ether/EtOAc = 2/1, v/v) as colorless oil. 91% yield.

$^1\text{H NMR}$  (400 MHz,  $\text{CDCl}_3$ ):  $\delta$  7.32-7.28 (m, 2H), 7.26-7.17 (m, 4H), 7.06 (dd,  $J = 8.0, 2.0$  Hz, 1H), 6.86 (d,  $J = 2.0$  Hz, 1H), 3.34-3.22 (m, 3H), 3.20 (s, 3H), 3.10 (d,  $J = 14.0$  Hz, 1H), 2.82 (t,  $J = 7.6$  Hz, 2H), 2.71 (s, 3H), 1.34 (s, 3H).

$^{13}\text{C NMR}$  (101 MHz,  $\text{CDCl}_3$ ):  $\delta$  178.4, 144.4, 138.4, 134.6, 129.0, 128.7, 126.8, 125.3, 122.5, 109.3, 55.6, 51.3, 45.5, 34.9, 34.4, 26.8, 24.8.

HRMS (ESI): calcd for  $\text{C}_{20}\text{H}_{24}\text{ClN}_2\text{O}_3\text{S}$   $[\text{M}+\text{H}]^+$  407.1196, found 407.1191.

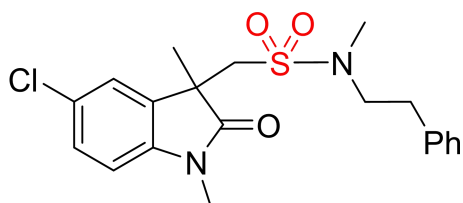

**1-(5-Chloro-1,3-dimethyl-2-oxoindolin-3-yl)-N-methyl-N-phenethylmethanesulfonamide (6g)<sup>[4]</sup>**

The product was isolated by flash chromatography (petroleum ether/EtOAc = 2/1, v/v) as colorless oil. 82% yield.

<sup>1</sup>H NMR (400 MHz, CDCl<sub>3</sub>): δ 7.32-7.26 (m, 4H), 7.25-7.18 (m, 3H), 6.78 (d, *J* = 8.0 Hz, 1H), 3.34 (d, *J* = 14.4 Hz, 1H), 3.31-3.23 (m, 2H), 3.21 (s, 3H), 3.10 (d, *J* = 14.0 Hz, 1H), 2.82 (t, *J* = 7.6 Hz, 2H), 2.70 (s, 3H), 1.34 (s, 3H).

<sup>13</sup>C NMR (101 MHz, CDCl<sub>3</sub>): δ 178.0, 141.9, 138.4, 132.4, 129.1, 128.8, 128.7, 128.0, 126.8, 124.8, 109.5, 55.7, 51.4, 45.9, 35.0, 34.4, 26.8, 24.9.

HRMS (ESI): calcd for C<sub>20</sub>H<sub>24</sub>ClN<sub>2</sub>O<sub>3</sub>S [M+H]<sup>+</sup>407.1196, found 407.1181.

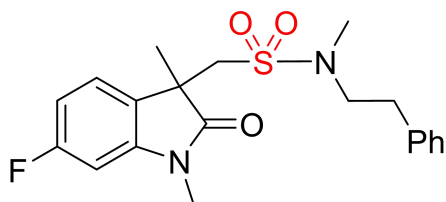

**1-(6-Fluoro-1,3-dimethyl-2-oxoindolin-3-yl)-N-methyl-N-phenethylmethanesulfonamide (6h)**

The product was isolated by flash chromatography (petroleum ether/EtOAc = 2/1, v/v) as colorless oil. 72% yield.

<sup>1</sup>H NMR (400 MHz, CDCl<sub>3</sub>): δ 7.32-7.23 (m, 4H), 7.21-7.17 (m, 2H), 6.80-6.75 (m, 1H), 6.61 (dd, *J* = 8.8, 2.0 Hz, 1H), 3.35-3.23 (m, 2H), 3.32 (d, *J* = 14.0 Hz, 1H), 3.21 (s, 3H), 3.10 (d, *J* = 14.4 Hz, 1H), 2.82 (t, *J* = 7.2 Hz, 2H), 2.71 (s, 3H), 1.35 (s, 3H).

<sup>13</sup>C NMR (101 MHz, CDCl<sub>3</sub>): δ 178.8, 163.4 (d, *J* = 246.5 Hz), 144.8 (d, *J* = 11.6 Hz), 138.4, 128.9 (d, *J* = 30.1 Hz), 126.8, 125.8 (d, *J* = 3.0 Hz), 125.4 (d, *J* = 10.1 Hz), 108.8 (d, *J* = 22.5 Hz), 97.4 (d, *J* = 27.7 Hz), 55.7, 51.4, 45.4, 35.0, 34.4, 26.8, 25.0.

<sup>19</sup>F NMR (377 MHz, CDCl<sub>3</sub>): δ -111.5.

HRMS (ESI): Calcd for C<sub>20</sub>H<sub>24</sub>FN<sub>2</sub>O<sub>3</sub>S [M+H]<sup>+</sup> 391.1492. Found: 391.1504.

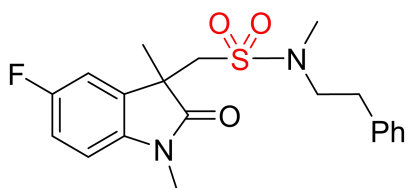

**1-(5-Fluoro-1,3-dimethyl-2-oxoindolin-3-yl)-N-methyl-N-phenethylmethanesulfonamide (6i)<sup>[4]</sup>**

The product was isolated by flash chromatography (petroleum ether/EtOAc = 2/1, v/v) as colorless oil. 60%

yield.

$^1\text{H NMR}$  (400 MHz,  $\text{CDCl}_3$ ):  $\delta$  7.32-7.28 (m, 2H), 7.26-7.18 (m, 3H), 7.11 (dd,  $J = 8.0, 2.4$  Hz, 1H), 7.00 (td,  $J = 8.8, 2.4$  Hz, 1H), 6.78 (dd,  $J = 8.4, 4.0$  Hz, 1H), 3.35-3.23 (m, 3H), 3.21 (s, 3H), 3.10 (d,  $J = 14.0$  Hz, 1H), 2.82 (t,  $J = 7.6$  Hz, 2H), 2.72 (s, 3H), 1.35 (s, 3H).

$^{13}\text{C NMR}$  (101 MHz,  $\text{CDCl}_3$ ):  $\delta$  178.1, 159.0 (d,  $J = 241.4$  Hz), 139.1, 138.4, 132.3 (d,  $J = 8.3$  Hz), 128.9 (d,  $J = 31.7$  Hz), 126.8, 115.0 (d,  $J = 23.5$  Hz), 112.6 (d,  $J = 25.1$  Hz), 109.0 (d,  $J = 8.1$  Hz), 55.6, 51.4, 46.2, 35.0, 34.4, 26.9, 24.9.

$^{19}\text{F NMR}$  (377 MHz,  $\text{CDCl}_3$ ):  $\delta$  -120.2.

HRMS (ESI): calcd for  $\text{C}_{20}\text{H}_{24}\text{FN}_2\text{O}_3\text{S}$   $[\text{M}+\text{H}]^+$  391.1492, found 225.1287.

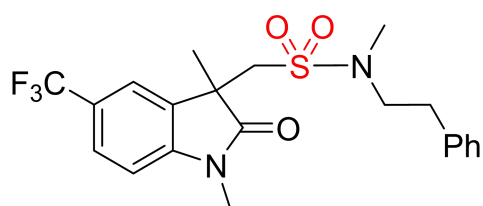

#### 1-(1,3-Dimethyl-2-oxo-5-(trifluoromethyl)indolin-3-yl)-*N*-methyl-*N*-phenethylmethanesulfonamide (6j)

The product was isolated by flash chromatography (petroleum ether/EtOAc = 2/1, v/v) as colorless oil. 82% yield.

$^1\text{H NMR}$  (400 MHz,  $\text{CDCl}_3$ ):  $\delta$  7.59-7.55 (m, 2H), 7.30 (t,  $J = 7.6$  Hz, 2H), 7.25-7.17 (m, 3H), 6.93 (d,  $J = 8.0$  Hz, 1H), 3.37 (d,  $J = 14.0$  Hz, 1H), 3.31-3.18 (m, 2H), 3.26 (s, 3H), 3.13 (d,  $J = 14.4$  Hz, 1H), 2.80 (t,  $J = 7.6$  Hz, 2H), 2.67 (s, 3H), 1.36 (s, 3H).

$^{13}\text{C NMR}$  (101 MHz,  $\text{CDCl}_3$ ):  $\delta$  178.4, 146.3, 138.4, 131.3, 129.1, 128.8, 126.8, 126.5 (q,  $J = 4.2$  Hz), 124.8 (q,  $J = 32.8$  Hz), 124.5 (q,  $J = 272.3$  Hz), 121.4 (q,  $J = 3.7$  Hz), 108.4, 55.8, 51.3, 45.7, 34.9, 34.3, 26.9, 24.9.

$^{19}\text{F NMR}$  (377 MHz,  $\text{CDCl}_3$ ):  $\delta$  -61.3.

HRMS (ESI): calcd for  $\text{C}_{21}\text{H}_{24}\text{F}_3\text{N}_2\text{O}_3\text{S}$   $[\text{M}+\text{H}]^+$  441.1460, found 441.1452.

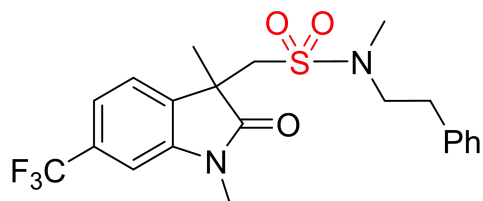

#### 1-(1,3-Dimethyl-2-oxo-6-(trifluoromethyl)indolin-3-yl)-*N*-methyl-*N*-phenethylmethanesulfonamide (6k)

The product was isolated by flash chromatography (petroleum ether/EtOAc = 2/1, v/v) as yellow-green oil. 72% yield.

$^1\text{H NMR}$  (400 MHz,  $\text{CDCl}_3$ ):  $\delta$  7.44 (d,  $J = 7.6$  Hz, 1H), 7.37 (d,  $J = 8.0$  Hz, 1H), 7.32-7.28 (m, 2H), 7.25-7.17 (m, 3H), 7.07 (s, 1H), 3.36-3.21 (m, 3H), 3.26 (s, 3H), 3.12 (d,  $J = 14.0$  Hz, 1H), 2.82 (t,  $J = 7.6$  Hz, 2H), 2.73 (s, 3H), 1.37 (s, 3H).

$^{13}\text{C}$  NMR (101 MHz,  $\text{CDCl}_3$ ):  $\delta$  178.2, 143.9, 138.4, 134.5, 131.2 (q,  $J = 32.7$  Hz), 129.1, 128.8, 126.8, 124.6, 124.1 (q,  $J = 273.5$  Hz), 119.7 (q,  $J = 3.9$  Hz), 105.3 (q,  $J = 3.7$  Hz), 55.5, 51.4, 45.8, 34.9, 34.4, 26.8, 24.8.

$^{19}\text{F}$  NMR (377 MHz,  $\text{CDCl}_3$ ):  $\delta$  -62.4.

HRMS (ESI): calcd for  $\text{C}_{21}\text{H}_{24}\text{F}_3\text{N}_2\text{O}_3\text{S}$   $[\text{M}+\text{H}]^+$  441.1460. found 441.1453.

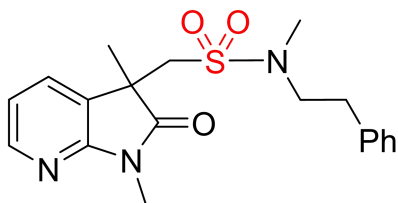

### 1-(1,3-Dimethyl-2-oxo-2,3-dihydro-1H-pyrrolo[2,3-b]pyridin-3-yl)-N-methyl-N-phenethylmethanesulfonamide (6l)

The product was isolated by flash chromatography (petroleum ether/EtOAc = 2/1, v/v) as colorless oil. 54% yield.

$^1\text{H}$  NMR (600 MHz,  $\text{CDCl}_3$ ):  $\delta$  8.21 (d,  $J = 4.2$  Hz, 1H), 7.64 (d,  $J = 6.6$  Hz, 1H), 7.29-7.27 (m, 2H), 7.23-7.17 (m, 3H), 7.01-6.98 (m, 1H), 3.34-3.26 (m, 2H), 3.31 (s, 3H), 3.22 (d,  $J = 14.4$  Hz, 1H), 3.10 (d,  $J = 14.4$  Hz, 1H), 2.82 (t,  $J = 7.2$  Hz, 2H), 2.74 (s, 3H), 1.40 (s, 3H).

$^{13}\text{C}$  NMR (101 MHz,  $\text{CDCl}_3$ ):  $\delta$  178.1, 156.5, 147.6, 138.3, 132.3, 129.0, 128.8, 126.8, 125.2, 118.3, 55.1, 51.4, 45.5, 34.9, 34.4, 25.8, 24.1.

HRMS (ESI): Calcd for  $\text{C}_{19}\text{H}_{24}\text{N}_3\text{O}_3\text{S}$   $[\text{M}+\text{H}]^+$  317.1538. Found: 317.1531.

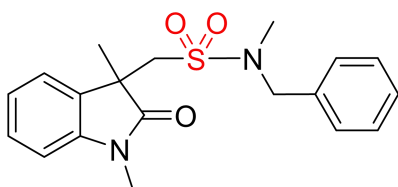

### N-Benzyl-1-(1,3-dimethyl-2-oxoindolin-3-yl)-N-methylmethanesulfonamide (8a)

The product was isolated by flash chromatography (petroleum ether/EtOAc = 2/1, v/v) as colorless oil. 84% yield.

$^1\text{H}$  NMR (400 MHz,  $\text{CDCl}_3$ ):  $\delta$  7.42 (d,  $J = 7.2$  Hz, 1H), 7.36-7.24 (m, 6H), 7.14 (t,  $J = 7.2$  Hz, 1H), 6.90 (d,  $J = 7.6$  Hz, 1H), 4.10 (d,  $J = 14.4$  Hz, 1H), 4.01 (d,  $J = 14.4$  Hz, 1H), 3.63 (d,  $J = 14.0$  Hz, 1H), 3.50 (d,  $J = 14.0$  Hz, 1H), 3.27 (s, 3H), 2.59 (s, 3H), 1.46 (s, 3H).

$^{13}\text{C}$  NMR (101 MHz,  $\text{CDCl}_3$ ):  $\delta$  178.4, 143.3, 135.8, 130.7, 128.9, 128.8, 128.4, 128.0, 124.3, 122.8, 108.7, 56.0, 53.5, 45.9, 33.8, 26.8, 25.1.

HRMS (ESI): Calcd for  $\text{C}_{19}\text{H}_{23}\text{N}_2\text{O}_3\text{S}$   $[\text{M}+\text{H}]^+$ : 359.1429. Found: 359.1433.



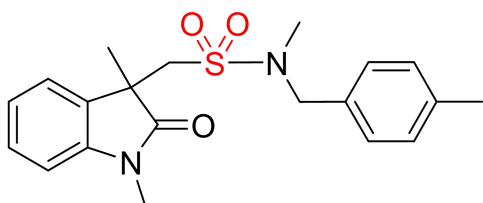

**1-(1,3-Dimethyl-2-oxoindolin-3-yl)-N-methyl-N-(4-methylbenzyl)methanesulfonamide (8b)**

The product was isolated by flash chromatography (petroleum ether/EtOAc = 2/1, v/v) as colorless oil. 86% yield.

$^1\text{H NMR}$  (400 MHz,  $\text{CDCl}_3$ ):  $\delta$  7.41 (d,  $J = 7.6$  Hz, 1H), 7.33 (td,  $J = 8.0, 0.8$  Hz, 1H), 7.15-7.10 (m, 5H), 6.90 (d,  $J = 8.0$  Hz, 1H), 4.06 (d,  $J = 14.8$  Hz, 1H), 3.98 (d,  $J = 14.4$  Hz, 1H), 3.61 (d,  $J = 14.4$  Hz, 1H), 3.48 (d,  $J = 14.4$  Hz, 1H), 3.27 (s, 3H), 2.58 (s, 3H), 2.32 (s, 3H), 1.46 (s, 3H).

$^{13}\text{C NMR}$  (101 MHz,  $\text{CDCl}_3$ ):  $\delta$  178.4, 143.3, 137.8, 132.7, 130.7, 129.4, 128.9, 128.4, 124.3, 122.8, 108.7, 56.0, 53.2, 45.9, 33.7, 26.8, 25.1, 21.2.

HRMS (ESI): Calcd for  $\text{C}_{20}\text{H}_{24}\text{N}_2\text{NaO}_3\text{S}$   $[\text{M}+\text{Na}]^+$  395.1405. Found: 395.1423.

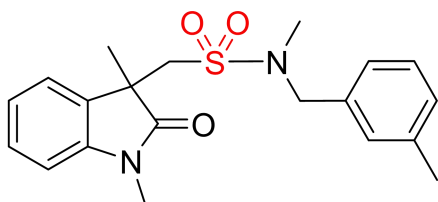

**1-(1,3-Dimethyl-2-oxoindolin-3-yl)-N-methyl-N-(3-methylbenzyl)methanesulfonamide (8c)**

The product was isolated by flash chromatography (petroleum ether/EtOAc = 2/1, v/v) as colorless oil. 80% yield.

$^1\text{H NMR}$  (400 MHz,  $\text{CDCl}_3$ ):  $\delta$  7.42 (d,  $J = 7.2$  Hz, 1H), 7.34 (t,  $J = 7.6$  Hz, 1H), 7.21-7.12 (m, 2H), 7.09-7.02 (m, 3H), 6.90 (d,  $J = 8.0$  Hz, 1H), 4.06 (d,  $J = 14.4$  Hz, 1H), 3.97 (d,  $J = 14.8$  Hz, 1H), 3.62 (d,  $J = 14.0$  Hz, 1H), 3.49 (d,  $J = 14.0$  Hz, 1H), 3.27 (s, 3H), 2.59 (s, 3H), 2.31 (s, 3H), 1.46 (s, 3H).

$^{13}\text{C NMR}$  (101 MHz,  $\text{CDCl}_3$ ):  $\delta$  178.4, 143.3, 138.5, 135.7, 130.7, 129.1, 128.9, 128.8, 128.6, 125.5, 124.3, 122.8, 108.7, 55.9, 53.4, 45.9, 33.8, 26.8, 25.1, 21.5.

HRMS (ESI): Calcd for  $\text{C}_{20}\text{H}_{25}\text{N}_2\text{O}_3\text{S}$   $[\text{M}+\text{H}]^+$  373.1586. Found: 373.1581.

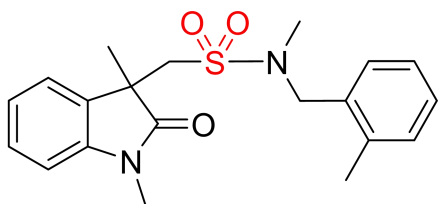

**1-(1,3-Dimethyl-2-oxoindolin-3-yl)-N-methyl-N-(2-methylbenzyl)methanesulfonamide (8d)**

The product was isolated by flash chromatography (petroleum ether/EtOAc = 2/1, v/v) as colorless oil. 87% yield.

$^1\text{H}$  NMR (400 MHz,  $\text{CDCl}_3$ ):  $\delta$  7.45 (d,  $J = 7.6$  Hz, 1H), 7.34 (td,  $J = 7.6, 1.2$  Hz, 1H), 7.21-7.12 (m, 5H), 6.91 (d,  $J = 8.0$  Hz, 1H), 4.13 (d,  $J = 14.4$  Hz, 1H), 4.01 (d,  $J = 14.4$  Hz, 1H), 3.64 (d,  $J = 14.0$  Hz, 1H), 3.52 (d,  $J = 14.0$  Hz, 1H), 3.27 (s, 3H), 2.60 (s, 3H), 2.27 (s, 3H), 1.49 (s, 3H).

$^{13}\text{C}$  NMR (101 MHz,  $\text{CDCl}_3$ ):  $\delta$  178.4, 143.3, 137.0, 133.3, 130.7, 129.0, 128.9, 128.0, 126.2, 124.3, 122.7, 108.7, 54.9, 51.4, 45.8, 33.8, 26.7, 25.0, 19.2.

HRMS (ESI): Calcd for  $\text{C}_{20}\text{H}_{25}\text{N}_2\text{O}_3\text{S}$   $[\text{M}+\text{H}]^+$  373.1586. Found: 373.1579.

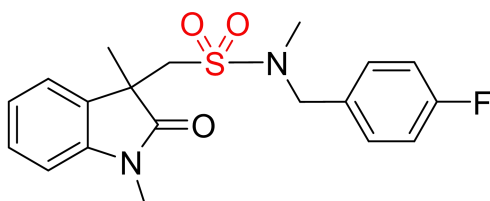

### 1-(1,3-Dimethyl-2-oxoindolin-3-yl)-N-(4-fluorobenzyl)-N-methylmethanesulfonamide (8e)

The product was isolated by flash chromatography (petroleum ether/EtOAc = 2/1, v/v) as colorless oil. 76% yield.

$^1\text{H}$  NMR (400 MHz,  $\text{CDCl}_3$ ):  $\delta$  7.41 (t,  $J = 7.6$  Hz, 1H), 7.34 (td,  $J = 7.6, 1.2$  Hz, 1H), 7.23-7.20 (m, 2H), 7.14 (t,  $J = 7.6$  Hz, 1H), 6.99 (t,  $J = 8.4$  Hz, 2H), 6.91 (d,  $J = 7.6$  Hz, 1H), 4.05 (d,  $J = 14.8$  Hz, 1H), 3.96 (d,  $J = 14.8$  Hz, 1H), 3.63 (d,  $J = 14.0$  Hz, 1H), 3.50 (d,  $J = 14.0$  Hz, 1H), 3.27 (s, 3H), 2.57 (s, 3H), 1.46 (s, 3H).

$^{13}\text{C}$  NMR (101 MHz,  $\text{CDCl}_3$ ):  $\delta$  178.3, 162.6 (d,  $J = 247.2$  Hz), 143.3, 131.6 (d,  $J = 3.1$  Hz), 130.6, 130.1 (d,  $J = 8.2$  Hz), 128.9, 124.2, 122.8, 115.6 (d,  $J = 21.6$  Hz), 108.7, 56.0, 52.7, 45.9, 33.7, 26.8, 25.2.

$^{19}\text{F}$  NMR (377 MHz,  $\text{CDCl}_3$ ):  $\delta$  -114.4.

HRMS (ESI): Calcd for  $\text{C}_{19}\text{H}_{22}\text{FN}_2\text{O}_3\text{S}$   $[\text{M}+\text{H}]^+$  377.1335. Found: 377.1329.

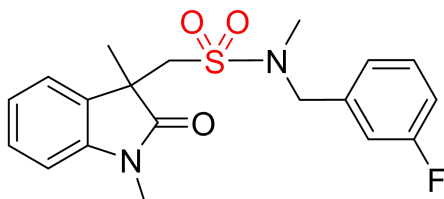

### 1-(1,3-Dimethyl-2-oxoindolin-3-yl)-N-(3-fluorobenzyl)-N-methylmethanesulfonamide (8f)

The product was isolated by flash chromatography (petroleum ether/EtOAc = 2/1, v/v) as colorless oil. 75% yield.

$^1\text{H}$  NMR (400 MHz,  $\text{CDCl}_3$ ):  $\delta$  7.41 (d,  $J = 7.2$  Hz, 1H), 7.34 (td,  $J = 7.6, 0.8$  Hz, 1H), 7.30-7.24 (m, 1H), 7.14 (t,  $J = 7.6$  Hz, 1H), 7.02 (d,  $J = 7.6$  Hz, 1H), 6.98-6.90 (m, 3H), 4.06 (d,  $J = 15.2$  Hz, 1H), 3.98 (d,  $J = 15.2$  Hz, 1H), 3.65 (d,  $J = 14.0$  Hz, 1H), 3.51 (d,  $J = 14.0$  Hz, 1H), 3.27 (s, 3H), 2.61 (s, 3H), 1.46 (s, 3H).

$^{13}\text{C}$  NMR (101 MHz,  $\text{CDCl}_3$ ):  $\delta$  178.3, 163.1 (d,  $J = 247.8$  Hz), 143.3, 138.5 (d,  $J = 7.1$  Hz), 130.6, 130.3 (d,  $J = 8.3$  Hz), 129.0, 124.2, 123.8 (d,  $J = 2.9$  Hz), 122.8, 115.2 (d,  $J = 18.5$  Hz), 114.9 (d,  $J = 17.9$  Hz), 108.7, 56.1, 52.9, 45.9, 33.9, 26.8, 25.2.

$^{19}\text{F}$  NMR (377 MHz,  $\text{CDCl}_3$ ):  $\delta$  -112.7.

HRMS (ESI): Calcd for C<sub>19</sub>H<sub>22</sub>FN<sub>2</sub>O<sub>3</sub>S [M+H]<sup>+</sup> 377.1335. Found: 377.1343.

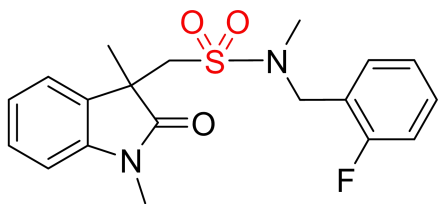

**1-(1,3-Dimethyl-2-oxoindolin-3-yl)-N-(2-fluorobenzyl)-N-methylmethanesulfonamide (8g)**

The product was isolated by flash chromatography (petroleum ether/EtOAc = 2/1, v/v) as colorless oil. 70% yield.

<sup>1</sup>H NMR (400 MHz, CDCl<sub>3</sub>): δ 7.39 (d, *J* = 7.2 Hz, 1H), 7.37-7.31 (m, 2H), 7.28-7.22 (m, 1H), 7.14-7.08 (m, 2H), 7.04-6.99 (m, 1H), 6.90 (d, *J* = 8.0 Hz, 1H), 4.16 (d, *J* = 14.8 Hz, 1H), 4.08 (d, *J* = 15.2 Hz, 1H), 3.65 (d, *J* = 14.4 Hz, 1H), 3.51 (d, *J* = 14.0 Hz, 1H), 3.27 (s, 3H), 2.62 (s, 3H), 1.45 (s, 3H).

<sup>13</sup>C NMR (101 MHz, CDCl<sub>3</sub>): δ 178.3, 161.1 (d, *J* = 247.2 Hz), 143.3, 130.7 (d, *J* = 3.9 Hz), 130.6, 129.8 (d, *J* = 8.2 Hz), 128.9, 124.7 (d, *J* = 3.6 Hz), 124.2, 122.9 (d, *J* = 14.3 Hz), 122.8, 115.4 (d, *J* = 21.6 Hz), 108.7, 56.3, 46.4, 45.8, 34.0, 26.7, 25.1.

<sup>19</sup>F NMR (377 MHz, CDCl<sub>3</sub>): δ -119.1.

HRMS (ESI): Calcd for C<sub>19</sub>H<sub>22</sub>FN<sub>2</sub>O<sub>3</sub>S [M+H]<sup>+</sup> 377.1335. Found: 377.1330.

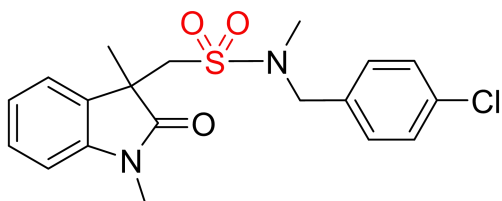

**N-(4-Chlorobenzyl)-1-(1,3-dimethyl-2-oxoindolin-3-yl)-N-methylmethanesulfonamide (8h)**

The product was isolated by flash chromatography (petroleum ether/EtOAc = 2/1, v/v) as colorless oil. 96% yield.

<sup>1</sup>H NMR (400 MHz, CDCl<sub>3</sub>): δ 7.41 (d, *J* = 7.6 Hz, 1H), 7.34 (t, *J* = 8.0 Hz, 1H), 7.27 (d, *J* = 8.8 Hz, 2H), 7.19-7.12 (m, 3H), 6.91 (d, *J* = 7.6 Hz, 1H), 4.04 (d, *J* = 14.8 Hz, 1H), 3.96 (d, *J* = 14.8 Hz, 1H), 3.63 (d, *J* = 14.0 Hz, 1H), 3.50 (d, *J* = 14.0 Hz, 1H), 3.27 (s, 3H), 2.58 (s, 3H), 1.46 (s, 3H).

<sup>13</sup>C NMR (101 MHz, CDCl<sub>3</sub>): δ 178.3, 143.3, 134.4, 133.9, 130.6, 129.7, 128.9, 124.2, 122.8, 108.7, 56.1, 52.8, 45.9, 33.8, 26.8, 25.2.

HRMS (ESI): calcd for C<sub>19</sub>H<sub>22</sub>ClN<sub>2</sub>O<sub>3</sub>S [M+H]<sup>+</sup> 393.1040. found 393.1048.

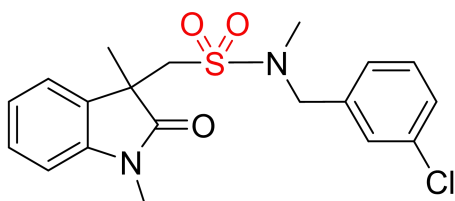

**N-(3-Chlorobenzyl)-1-(1,3-dimethyl-2-oxoindolin-3-yl)-N-methylmethanesulfonamide (8i)**

The product was isolated by flash chromatography (petroleum ether/EtOAc = 2/1, v/v) as colorless oil. 86% yield.

$^1\text{H}$  NMR (400 MHz,  $\text{CDCl}_3$ ):  $\delta$  7.40 (d,  $J = 7.6$  Hz, 1H), 7.34 (td,  $J = 7.6, 0.8$  Hz, 1H), 7.24-7.21 (m, 3H), 7.16-7.13 (m, 2H), 6.91 (d,  $J = 7.6$  Hz, 1H), 4.03 (d,  $J = 14.8$  Hz, 1H), 3.95 (d,  $J = 15.2$  Hz, 1H), 3.65 (d,  $J = 14.4$  Hz, 1H), 3.52 (d,  $J = 14.0$  Hz, 1H), 3.27 (s, 3H), 2.59 (s, 3H), 1.46 (s, 3H).

$^{13}\text{C}$  NMR (101 MHz,  $\text{CDCl}_3$ ):  $\delta$  178.3, 143.3, 138.0, 134.6, 130.6, 130.1, 128.9, 128.3, 128.2, 126.4, 124.1, 122.8, 108.7, 56.1, 52.9, 45.8, 33.9, 26.8, 25.2.

HRMS (ESI): calcd for  $\text{C}_{19}\text{H}_{22}\text{ClN}_2\text{O}_3\text{S}$   $[\text{M}+\text{H}]^+$  393.1040. found 393.1034.

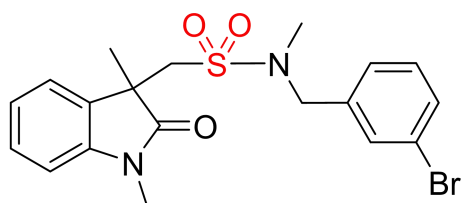

#### ***N*-(3-Bromobenzyl)-1-(1,3-dimethyl-2-oxoindolin-3-yl)-*N*-methylmethanesulfonamide (8j)**

The product was isolated by flash chromatography (petroleum ether/EtOAc = 2/1, v/v) as colorless oil. 54% yield.

$^1\text{H}$  NMR (400 MHz,  $\text{CDCl}_3$ ):  $\delta$  7.41-7.38 (m, 3H), 7.34 (td,  $J = 8.0, 1.2$  Hz, 1H), 7.20-7.12 (m, 3H), 6.91 (d,  $J = 7.6$  Hz, 1H), 4.03 (d,  $J = 14.8$  Hz, 1H), 3.95 (d,  $J = 14.8$  Hz, 1H), 3.65 (d,  $J = 14.4$  Hz, 1H), 3.51 (d,  $J = 14.4$  Hz, 1H), 3.27 (s, 3H), 2.60 (s, 3H), 1.46 (s, 3H).

$^{13}\text{C}$  NMR (101 MHz,  $\text{CDCl}_3$ ):  $\delta$  178.3, 143.3, 138.3, 131.3, 131.2, 130.6, 130.4, 129.0, 126.9, 124.2, 122.8, 108.8, 56.2, 52.9, 45.9, 33.9, 26.8, 25.2.

HRMS (ESI): Calcd for  $\text{C}_{19}\text{H}_{22}\text{BrN}_2\text{O}_3\text{S}$   $[\text{M}+\text{H}]^+$  437.0535. Found: 437.0528.

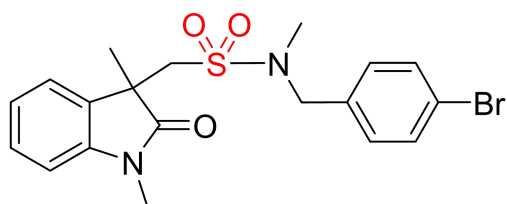

#### ***N*-(4-Bromobenzyl)-1-(1,3-dimethyl-2-oxoindolin-3-yl)-*N*-methylmethanesulfonamide (8k)**

The product was isolated by flash chromatography (petroleum ether/EtOAc = 2/1, v/v) as colorless oil. 43% yield.

$^1\text{H}$  NMR (400 MHz,  $\text{CDCl}_3$ ):  $\delta$  7.43-7.40 (m, 3H), 7.34 (td,  $J = 7.6, 0.8$  Hz, 1H), 7.16-7.11 (m, 3H), 6.91 (d,  $J = 8.0$  Hz, 1H), 4.02 (d,  $J = 14.8$  Hz, 1H), 3.94 (d,  $J = 14.8$  Hz, 1H), 3.64 (d,  $J = 14.4$  Hz, 1H), 3.51 (d,  $J = 14.4$  Hz, 1H), 3.27 (s, 3H), 2.58 (s, 3H), 1.46 (s, 3H).

$^{13}\text{C}$  NMR (101 MHz,  $\text{CDCl}_3$ ):  $\delta$  178.3, 143.3, 134.9, 131.9, 130.6, 130.0, 128.9, 124.2, 122.8, 122.0, 108.7, 56.1, 52.8, 45.8, 33.8, 26.8, 25.2.

HRMS (ESI): Calcd for  $\text{C}_{19}\text{H}_{22}\text{BrN}_2\text{O}_3\text{S}$   $[\text{M}+\text{H}]^+$  437.0535. Found: 437.0526.

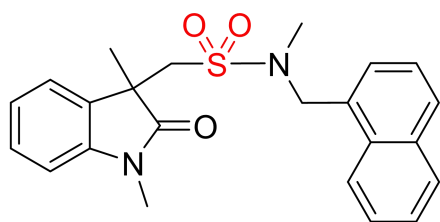

### 1-(1,3-Dimethyl-2-oxoindolin-3-yl)-N-methyl-N-(naphthalen-1-ylmethyl)methanesulfonamide (**8i**)

The product was isolated by flash chromatography (petroleum ether/EtOAc = 2/1, v/v) as colorless oil. 54% yield.

$^1\text{H}$  NMR (400 MHz,  $\text{CDCl}_3$ ):  $\delta$  8.17-8.15 (m, 1H), 7.86-7.80 (m, 2H), 7.52-7.47 (m, 3H), 7.43-7.35 (m, 3H), 7.17 (t,  $J = 7.2$  Hz, 1H), 6.93 (d,  $J = 7.6$  Hz, 1H), 4.62 (d,  $J = 14.0$  Hz, 1H), 4.51 (d,  $J = 14.0$  Hz, 1H), 3.68 (d,  $J = 14.0$  Hz, 1H), 3.57 (d,  $J = 14.0$  Hz, 1H), 3.29 (s, 3H), 2.60 (s, 3H), 1.51 (s, 3H).

$^{13}\text{C}$  NMR (101 MHz,  $\text{CDCl}_3$ ):  $\delta$  178.5, 143.4, 134.0, 131.7, 130.8, 130.7, 129.1, 129.0, 128.7, 127.4, 126.7, 126.1, 125.2, 124.3, 123.9, 122.8, 108.8, 54.7, 51.9, 45.8, 33.9, 26.8, 25.0.

HRMS (ESI): calcd for  $\text{C}_{23}\text{H}_{25}\text{N}_2\text{O}_3\text{S}$   $[\text{M}+\text{H}]^+$  409.1586. Found: 409.1580.

## V. Mechanistic study

### (1) The control experiments

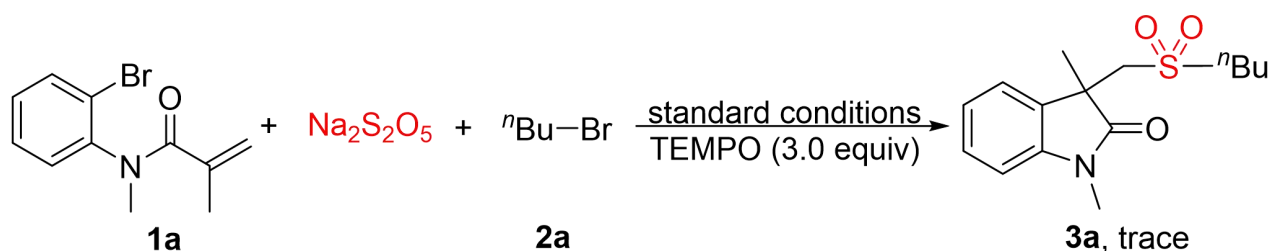

In a nitrogen-filled glove box, **1a** (25.4 mg, 0.1 mmol, 1.0 equiv),  $\text{Na}_2\text{S}_2\text{O}_5$  (38 mg, 0.2 mmol, 2.0 equiv),  $\text{Pd}(\text{MeCN})_2\text{Cl}_2$  (2.6 mg, 0.01 mmol, 10 mol%),  $\text{PPh}_3$  (6.3 mg, 0.024 mmol, 24 mol%), Zn dust (19.6 mg, 0.3 mmol, 3 equiv),  $\text{K}_2\text{HPO}_4$  (61 mg, 0.35 mmol, 3.5 equiv), TEMPO (46.9 mg, 0.30 mmol, 3.0 equiv), and DMSO (0.8 mL) were added to a 10-mL Schlenk tube. After stirring at room temperature for 1 min, 1-bromobutane **2a** (32  $\mu\text{L}$ , 0.3 mmol, 3.0 equiv) and GC standard  $n\text{-C}_{12}\text{H}_{26}$  (10  $\mu\text{L}$ ) was added. The reaction mixture was stirred at 120  $^\circ\text{C}$  for 48 h and then diluted with 3 mL of EtOAc. Aliquots were taken from the organic phase, and passed through a short plug of silica gel with EtOAc washing (about 1.5 mL). The filtrate was subjected to GC analysis to determine the yield of the product **3a**. GC analysis showed that trace amount of **3a** was obtained.

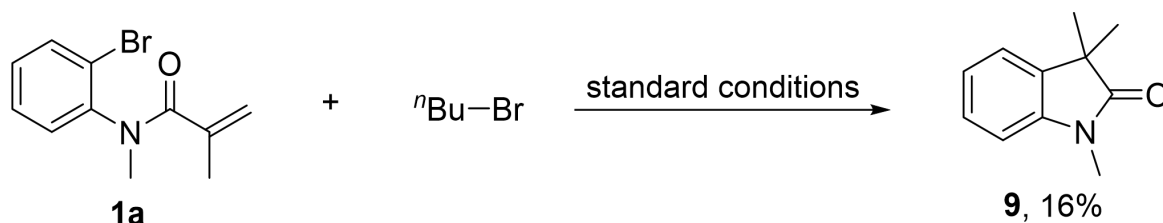

In a nitrogen-filled glove box, **1a** (50.8 mg, 0.2 mmol, 1.0 equiv), Pd(MeCN)<sub>2</sub>Cl<sub>2</sub> (5.2 mg, 0.02 mmol, 10 mol%), PPh<sub>3</sub> (12.6 mg, 0.048 mmol, 24 mol%), Zn dust (39.6 mg, 0.6 mmol, 3 equiv), K<sub>2</sub>HPO<sub>4</sub> (122 mg, 0.7 mmol, 3.5 equiv), 1-bromobutane **2a** (64 μL, 0.6 mmol, 3.0 equiv), and DMSO (1.0 mL) were added to a 10-mL Schlenk tube. The reaction mixture was stirred at 120 °C for 48 h. The reaction mixture was cooled to room temperature and then extracted with EtOAc. The solvent was removed under reduced pressure and the crude product was purified by flash chromatograph to afford **9** in 16% yield. <sup>1</sup>H NMR (600 MHz, CDCl<sub>3</sub>): δ 7.28-7.25 (m, 1H), 7.21 (d, *J* = 7.2 Hz, 1H), 7.06 (td, *J* = 7.8, 1.2 Hz, 1H), 6.85 (d, *J* = 7.8 Hz, 1H), 3.22 (s, 3H), 1.37 (s, 6H). The <sup>1</sup>H NMR data matched that reported in the literature.<sup>[5]</sup>

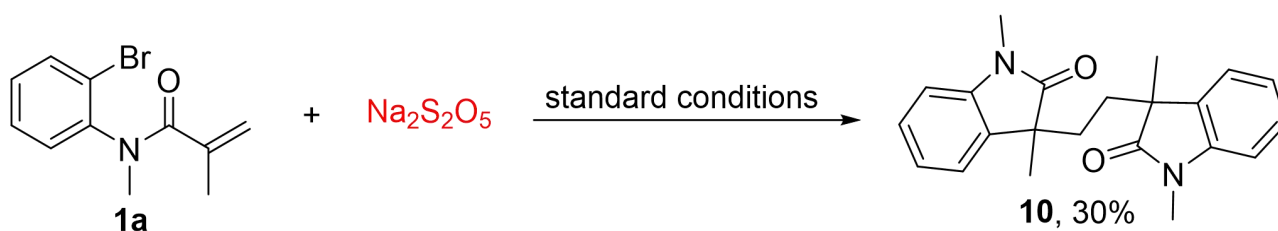

In a nitrogen-filled glove box, **1a** (50.8 mg, 0.2 mmol, 1.0 equiv), Na<sub>2</sub>S<sub>2</sub>O<sub>5</sub> (76 mg, 0.4 mmol, 2.0 equiv), Pd(MeCN)<sub>2</sub>Cl<sub>2</sub> (5.2 mg, 0.02 mmol, 10 mol%), PPh<sub>3</sub> (12.6 mg, 0.048 mmol, 24 mol%), Zn dust (39.6 mg, 0.6 mmol, 3 equiv), K<sub>2</sub>HPO<sub>4</sub> (122 mg, 0.7 mmol, 3.5 equiv), and DMSO (1.0 mL) were added to a 10-mL Schlenk tube. The reaction mixture was stirred at 120 °C for 48 h. The reaction mixture was cooled to room temperature and then extracted with EtOAc. The solvent was removed under reduced pressure and the crude product was purified by flash chromatograph to afford dimer **10** in 30% yield (d.r., 1:1). <sup>1</sup>H NMR (400 MHz, CDCl<sub>3</sub>): δ 7.29-7.24 (m, 2H), 7.13 (dd, *J* = 7.2, 1.2 Hz, 2H), 7.07 (td, *J* = 7.6, 1.2 Hz, 2H), 6.83 (d, *J* = 7.6 Hz, 2H), 3.21 (s, 6H), 1.47-1.40 (m, 4H), 1.21 (s, 6H). Diastereoisomer: <sup>1</sup>H NMR (400 MHz, CDCl<sub>3</sub>): δ 7.25 (td, *J* = 7.6, 1.6 Hz, 2H), 7.03 (td, *J* = 7.2, 0.8 Hz, 2H), 6.99 (dd, *J* = 7.2, 1.2 Hz, 2H), 6.81 (dt, *J* = 8.0, 0.8 Hz, 2H), 3.18 (s, 6H), 1.77-1.63 (m, 2H), 1.40-1.31 (m, 2H), 1.25 (s, 6H). The <sup>1</sup>H NMR data matched those reported in the literature.<sup>[6]</sup>

## (2) The synthesis and catalytic reaction of metalated Pd(II) complex

### 1) Synthesis of metalated Pd(II) complex 11

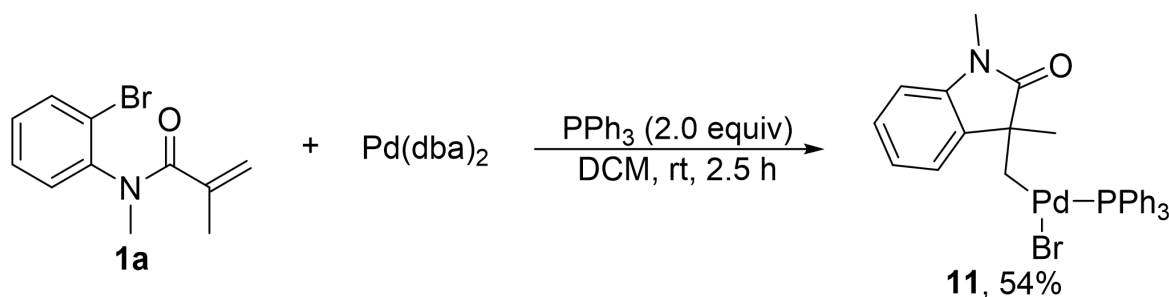

A Schlenk tube with a magnetic stir bar was charged with Pd(dba)<sub>2</sub> (100 mg, 0.176 mmol), PPh<sub>3</sub> (92 mg, 0.352

mmol), **1a** (50.8 mg, 0.20 mmol, 1.1 equiv), and CH<sub>2</sub>Cl<sub>2</sub> (1.0 mL) under an N<sub>2</sub> atmosphere. The resulting mixture was stirred at room temperature for 2.5 h, and then Et<sub>2</sub>O (10 mL) was added. The resulting suspension was filtered, and the solid was washed with Et<sub>2</sub>O (2 × 1 mL) and N<sub>2</sub>-dried to give compound **11** as a gray solid in 54% yield. <sup>1</sup>H NMR (400 MHz, CDCl<sub>3</sub>): δ 7.77-7.74 (m, 6H), 7.46-7.38 (m, 9H), 7.22 (t, *J* = 7.8 Hz, 1H), 7.00 (t, *J* = 7.8 Hz, 1H), 6.84-6.80 (m, 2H), 3.29 (s, 3H), 1.84 (s, 3H), 1.62 (m, 1H), 1.01 (t, *J* = 7.8 Hz, 1H). HRMS (ESI): calcd for C<sub>29</sub>H<sub>27</sub>NOPPd [M-Br]<sup>+</sup> 542.0865, found 542.0865.

## 2) Complex **11**-catalyzed domino cyclization/alkylsulfonylation

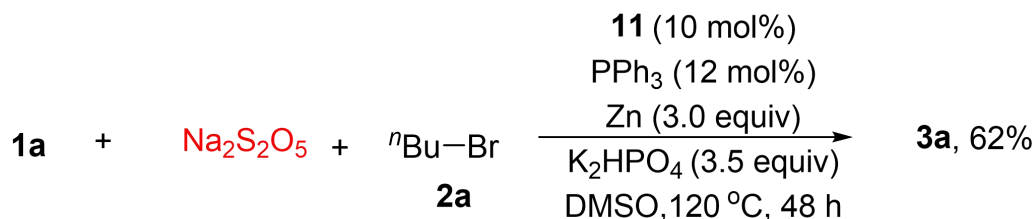

In a nitrogen-filled glove box, **1a** (25.4 mg, 0.1 mmol, 1.0 equiv), Na<sub>2</sub>S<sub>2</sub>O<sub>5</sub> (38 mg, 0.2 mmol, 2.0 equiv), complex **11** (6.2 mg, 0.01 mmol, 10 mol%), PPh<sub>3</sub> (3.2 mg, 0.012 mmol, 12 mol%), Zn dust (19.6 mg, 0.3 mmol, 3 equiv), K<sub>2</sub>HPO<sub>4</sub> (61 mg, 0.35 mmol, 3.5 equiv), and DMSO (0.8 mL) were added to a 10-mL Schlenk tube. After stirring at room temperature for 1 min, 1-bromobutane **2a** (32 μL, 0.3 mmol, 3.0 equiv) and GC standard *n*-C<sub>12</sub>H<sub>26</sub> (10 μL) was added. The reaction mixture was stirred at 120 °C for 48 h and then diluted with 3 mL of EtOAc. Aliquots were taken from the organic phase, and passed through a short plug of silica gel with EtOAc washing (about 1.5 mL). The filtrate was subjected to GC analysis to determine the yield of the product **3a**. GC analysis showed that 62% yield of **3a** was obtained.

## (3) Plausible mechanistic pathway for the palladium-catalyzed domino cyclization/aminosulfonylation

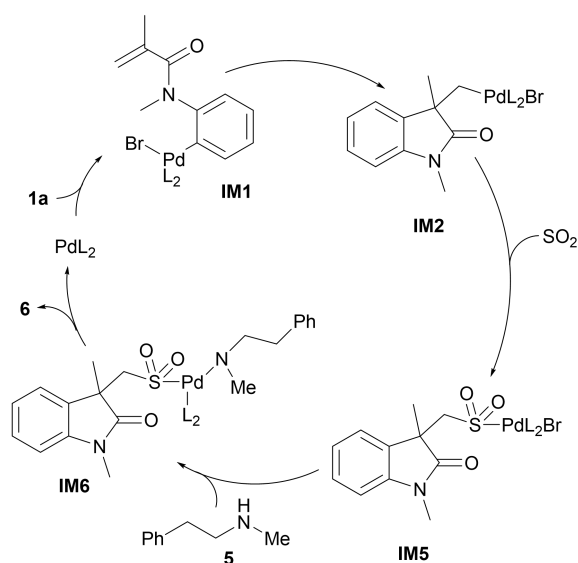

**Scheme S1.** The plausible mechanism for the formation of product **6**.

## VI. Reference

- [1] R. Kotipalli, A. Nagireddy, M. S. Reddy, *Org. Biomol. Chem.* **2022**, *20*, 2609-2614.
- [2] D. Xia, T. Miao, P. Li, L. Wang, *Chem. Asian J.* **2015**, *10*, 1919-1925.
- [3] Y.-Y. Jiang, S. Liang, C.-C. Zeng, L.-M. Hua, B.-G. Sun, *Green Chem.* **2016**, *18*, 6311-6319.
- [4] H. Lv, X. He, L. Shen, X. Zhang, Z. Lian, *Adv. Synth. Catal.* **2022**, *364*, 2729-2734.
- [5] C. Liu, D. Liu, W. Zhang, L. Zhou, A. Lei, *Org. Lett.* **2013**, *15*, 6166-6169.
- [6] K. Wang, Z. Ding, Z. Zhou, W. Kong, *J. Am. Chem. Soc.* **2018**, *140*, 12364-12368.



# VII. Copies of NMR spectra

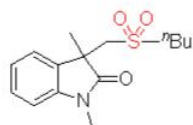

7.369  
7.351  
7.332  
7.313  
7.260  
7.119  
7.100  
7.081  
6.908  
6.889

3.643  
3.607  
3.536  
3.500  
3.251  
2.715  
2.680  
2.667  
2.662  
2.647  
2.630  
2.615  
2.595

1.699  
1.680  
1.661  
1.640  
1.449  
1.367  
1.348  
1.330  
1.311  
0.890  
0.871

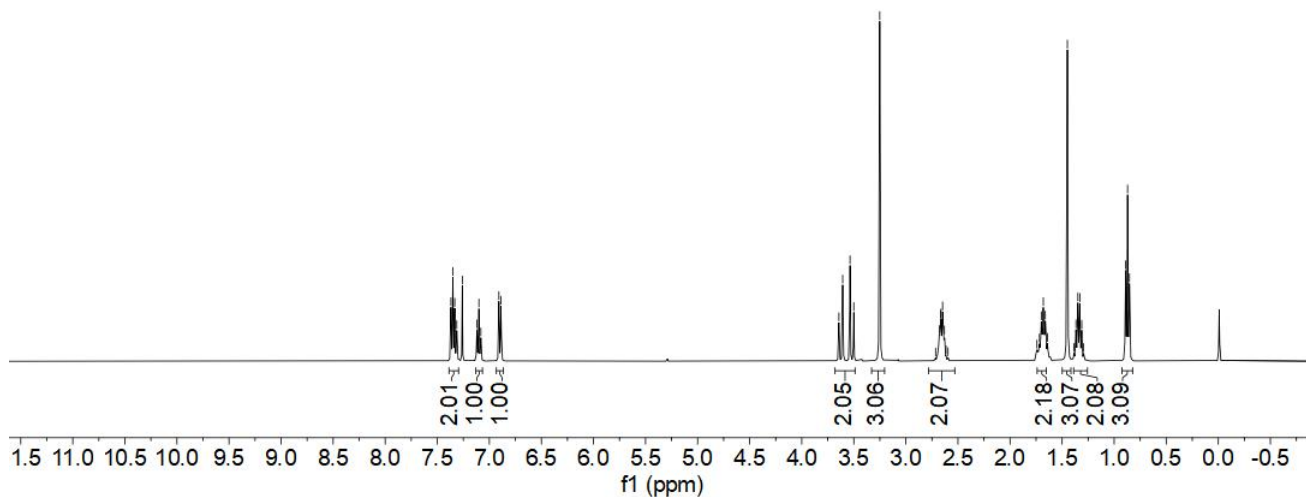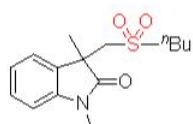

178.069

143.478

130.390  
129.135  
123.666  
122.694

108.921

77.371  
77.160  
76.948

58.613  
55.068

45.598

26.765  
25.154  
23.817  
21.694  
13.596

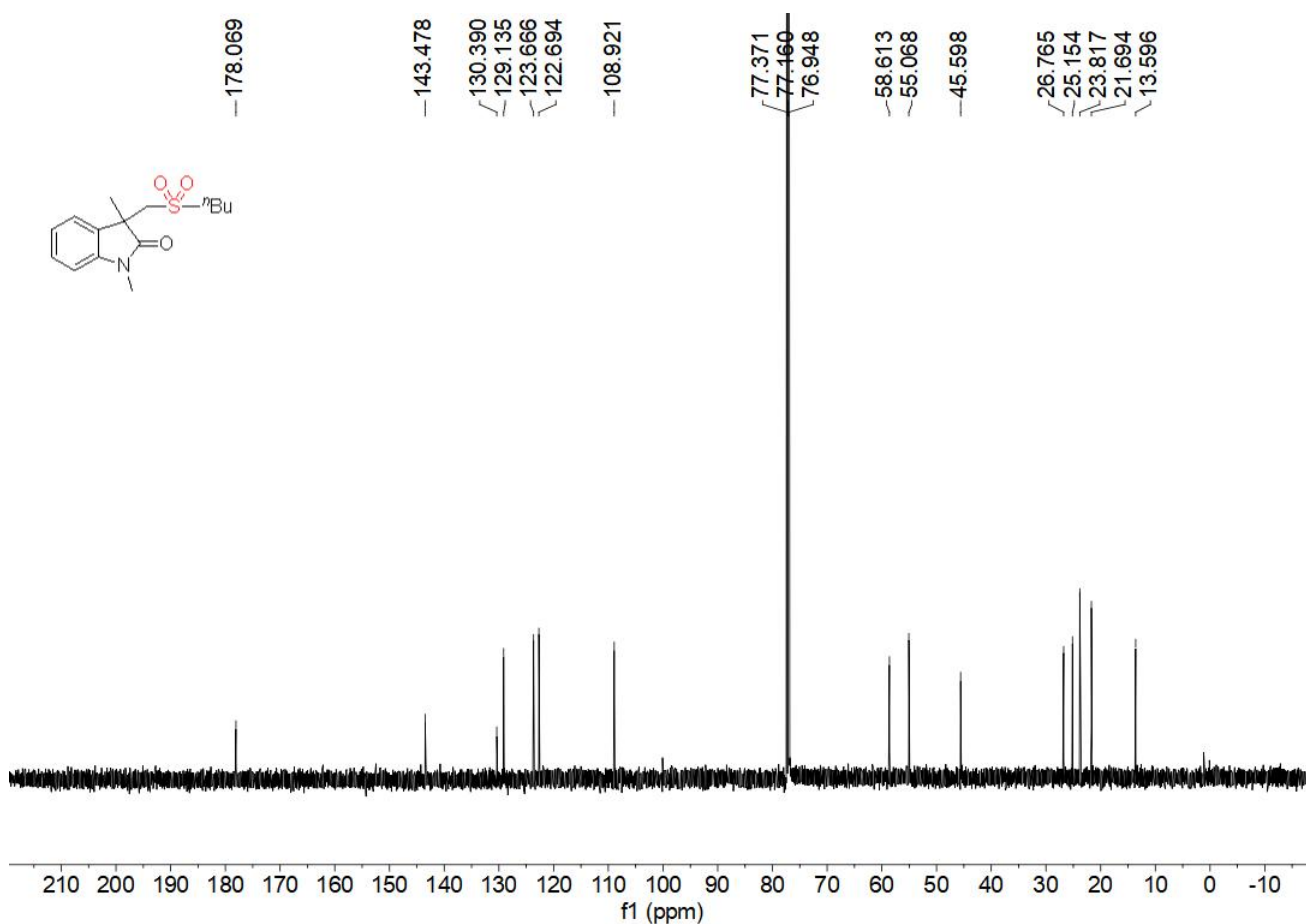

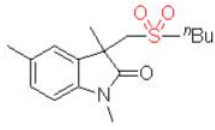

7.260  
7.170  
7.137  
7.117  
6.795  
6.775  
3.624  
3.588  
3.514  
3.478  
3.230  
2.733  
2.711  
2.699  
2.683  
2.675  
2.659  
2.643  
2.635  
2.619  
2.606  
2.585  
2.350  
1.709  
1.702  
1.688  
1.667  
1.660  
1.436  
1.368  
1.349  
1.330  
1.312  
0.899  
0.881  
0.862

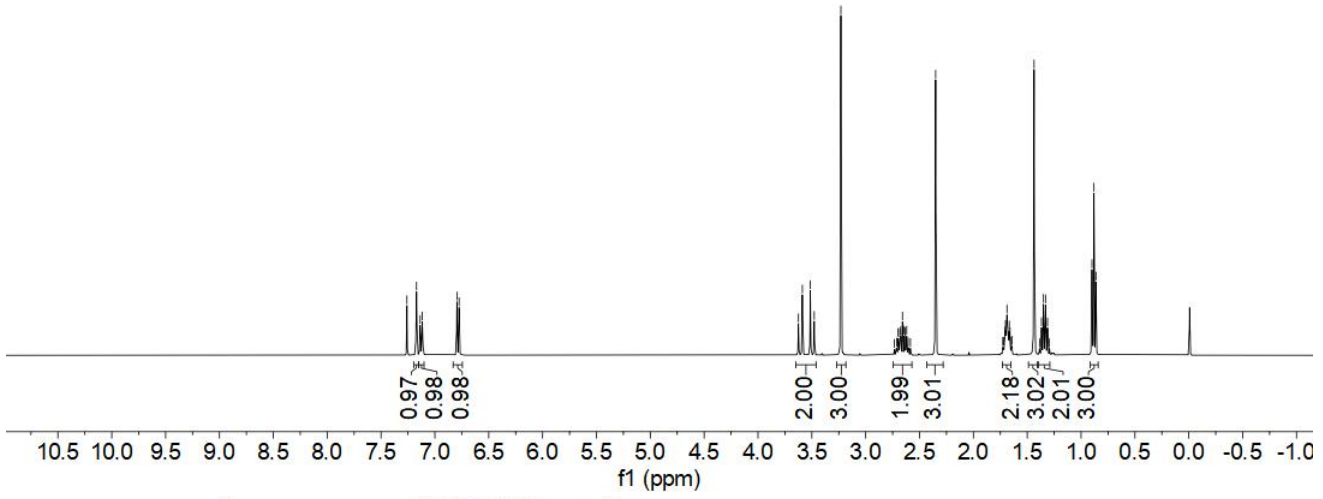

-177.954

-141.099

-132.234

-130.472

-129.372

-124.418

-108.638

77.477

77.160

76.842

-58.598

-55.047

-45.685

26.763

25.183

23.877

21.701

21.282

13.576

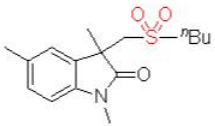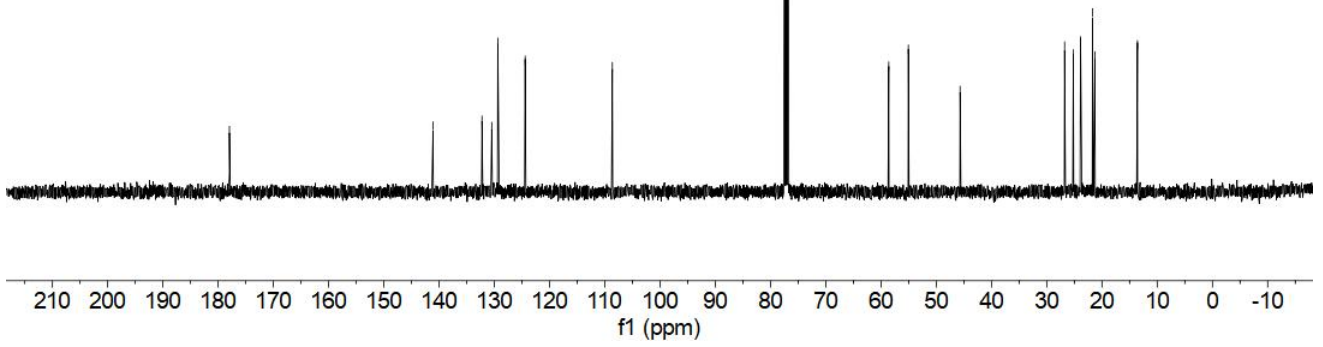

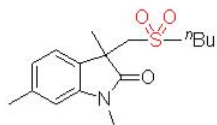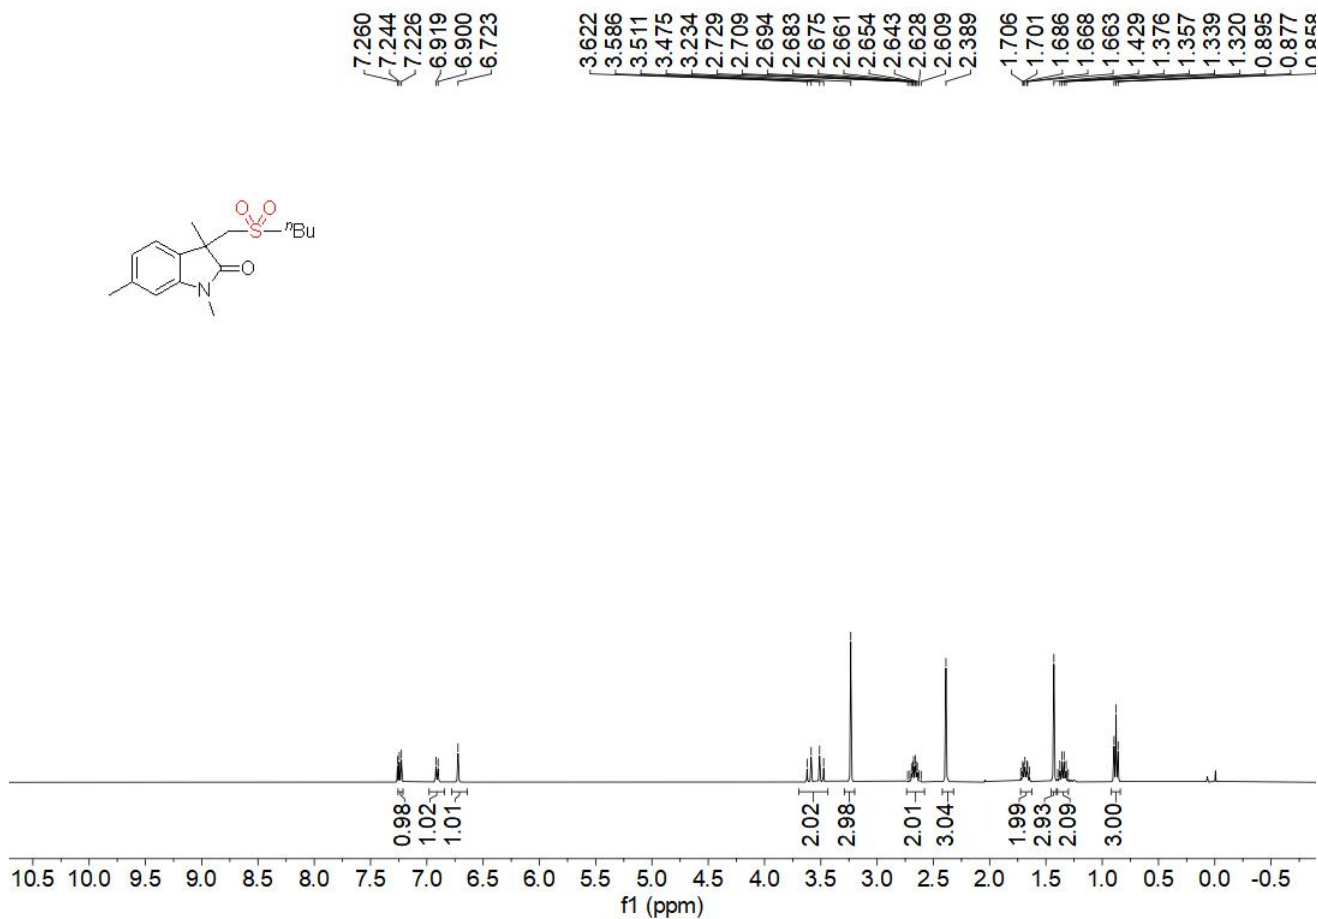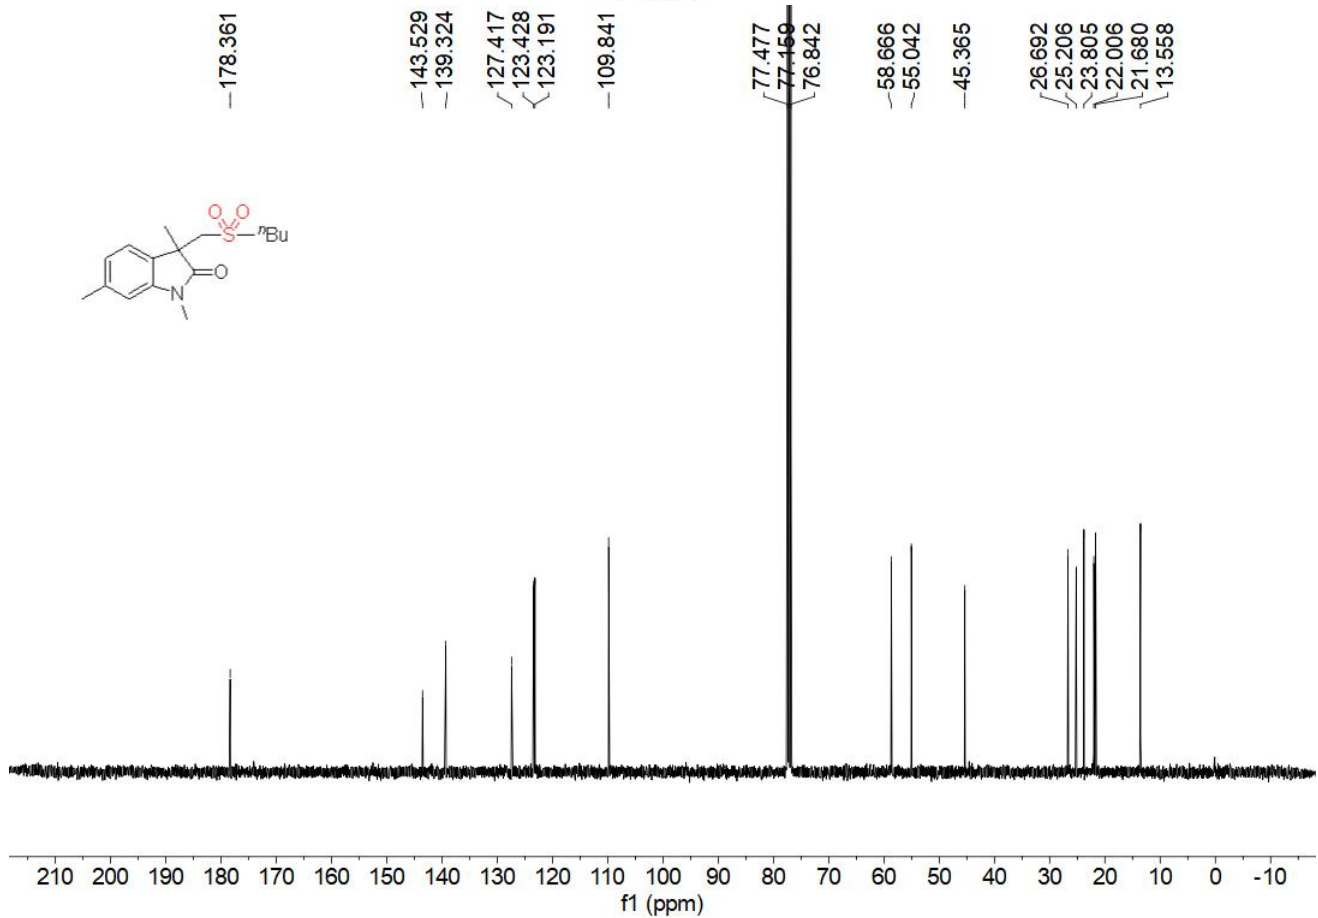

7.260  
6.961  
6.857  
3.630  
3.593  
3.497  
3.483  
3.446  
2.705  
2.689  
2.680  
2.670  
2.655  
2.645  
2.629  
2.620  
2.605  
2.595  
2.580  
2.569  
2.561  
2.536  
2.288  
1.755  
1.740  
1.722  
1.703  
1.698  
1.689  
1.680  
1.672  
1.664  
1.649  
1.631  
1.615  
1.395  
1.377  
1.358  
1.339  
1.321  
1.302  
1.284  
0.897  
0.879  
0.860

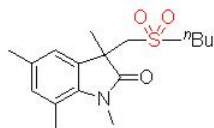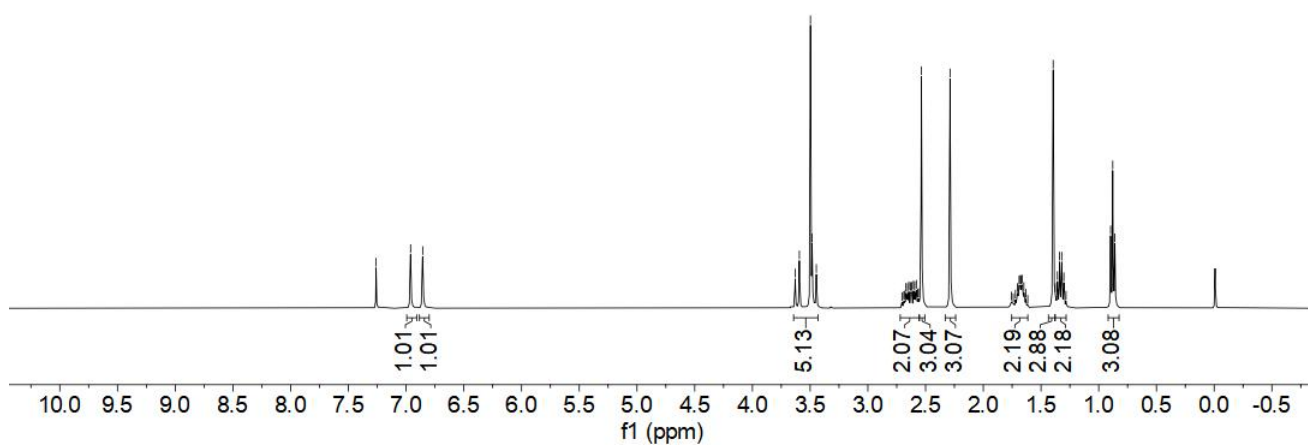

178.709  
138.916  
133.292  
132.001  
131.113  
121.997  
120.263  
77.478  
77.160  
76.843  
58.879  
54.982  
45.096  
30.073  
25.672  
23.900  
21.692  
20.926  
19.068  
13.560

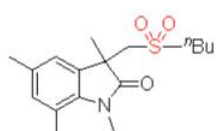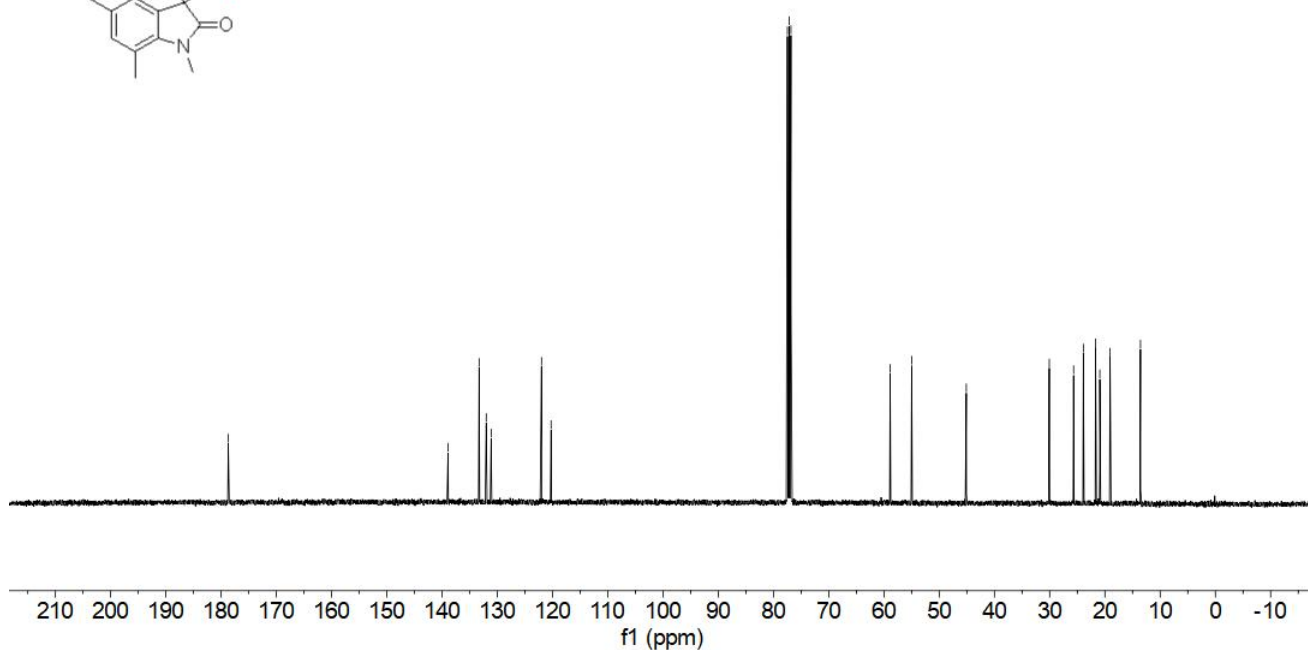

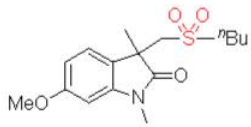

7.267  
7.260  
7.246  
6.609  
6.603  
6.588  
6.583  
6.476  
6.470  
3.827  
3.604  
3.568  
3.500  
3.464  
3.229  
2.742  
2.722  
2.708  
2.689  
2.673  
2.654  
2.639  
2.620  
1.730  
1.714  
1.710  
1.694  
1.675  
1.671  
1.654  
1.429  
1.384  
1.366  
1.347  
1.329  
0.903  
0.884  
0.866

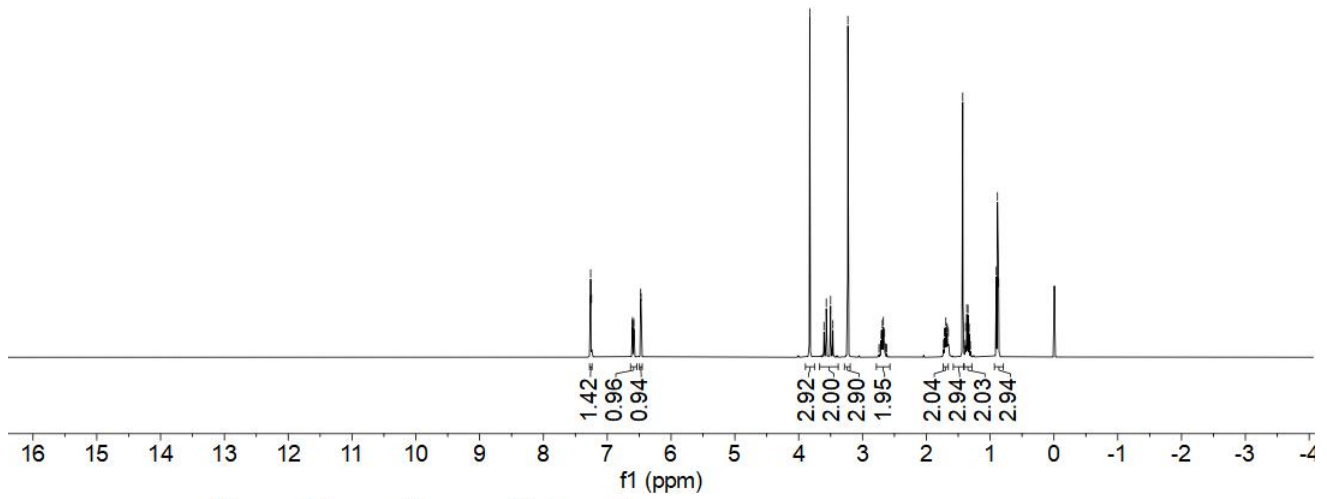

-178.675  
-160.852  
-144.774  
124.428  
122.144  
-106.563  
-96.781  
77.479  
77.162  
76.844  
58.677  
55.631  
55.070  
-45.128  
26.757  
25.247  
23.831  
21.701  
13.590

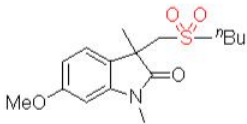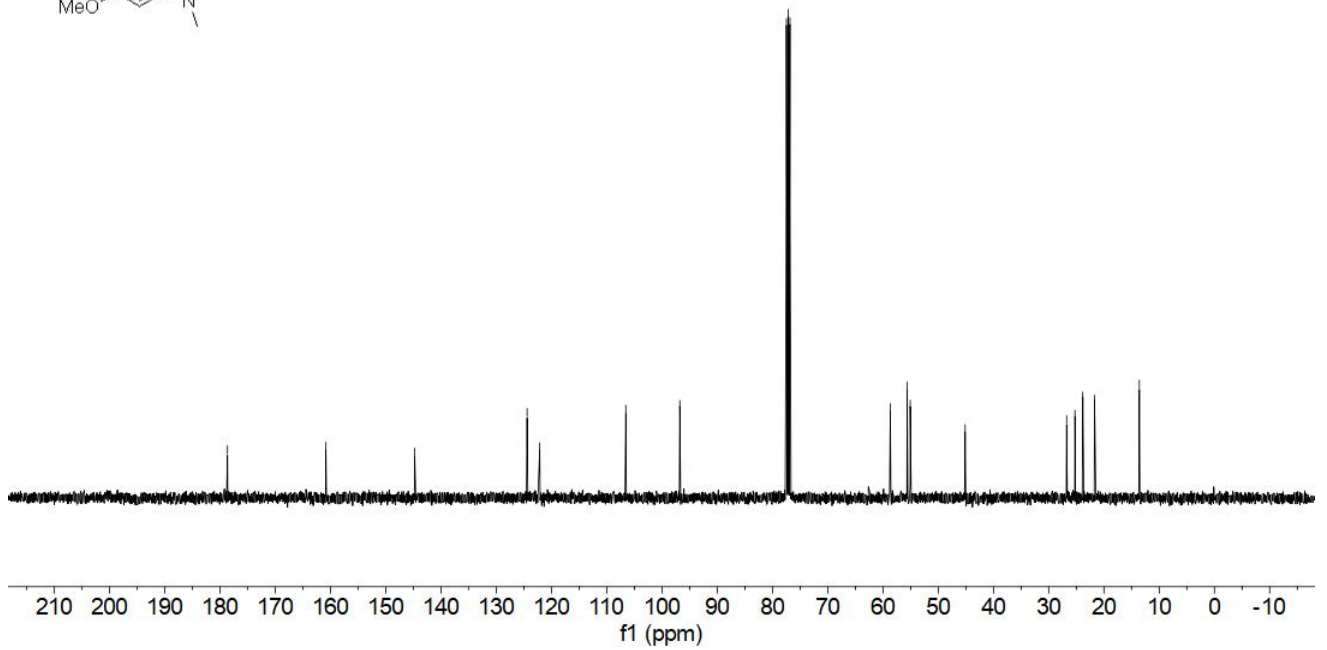

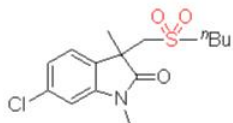

7.296  
7.276  
7.260  
7.081  
7.077  
7.062  
7.058  
6.892  
6.888

3.642  
3.606  
3.515  
3.479  
3.229  
2.819  
2.799  
2.784  
2.776  
2.766  
2.754  
2.744  
2.736  
2.720  
2.701  
1.743  
1.725  
1.704  
1.686  
1.665  
1.429  
1.404  
1.386  
1.367  
1.349  
1.330  
0.913  
0.894  
0.876

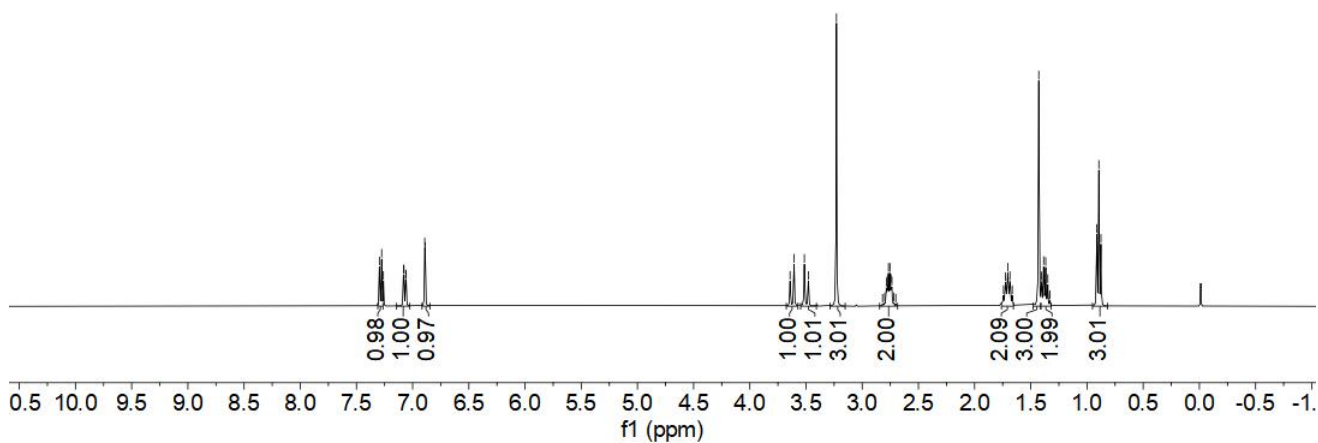

-178.100

-144.603

-134.854

-128.819

-124.767

-122.545

-109.641

77.477

77.160

76.842

58.298

55.264

45.300

26.846

25.163

23.790

21.681

13.580

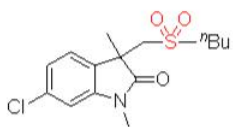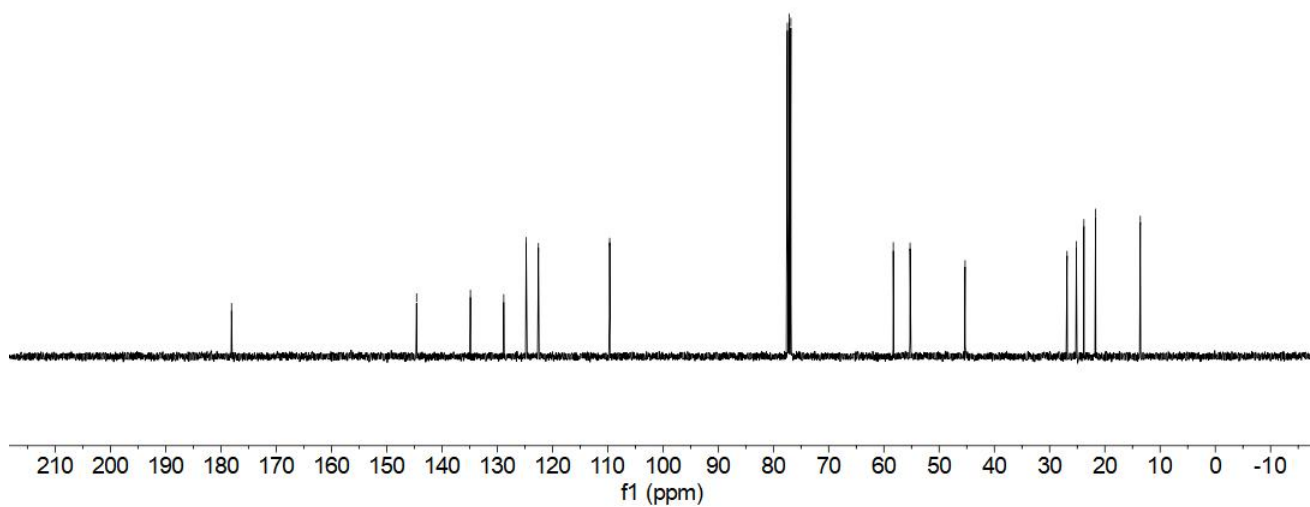



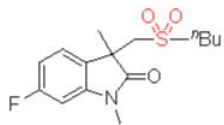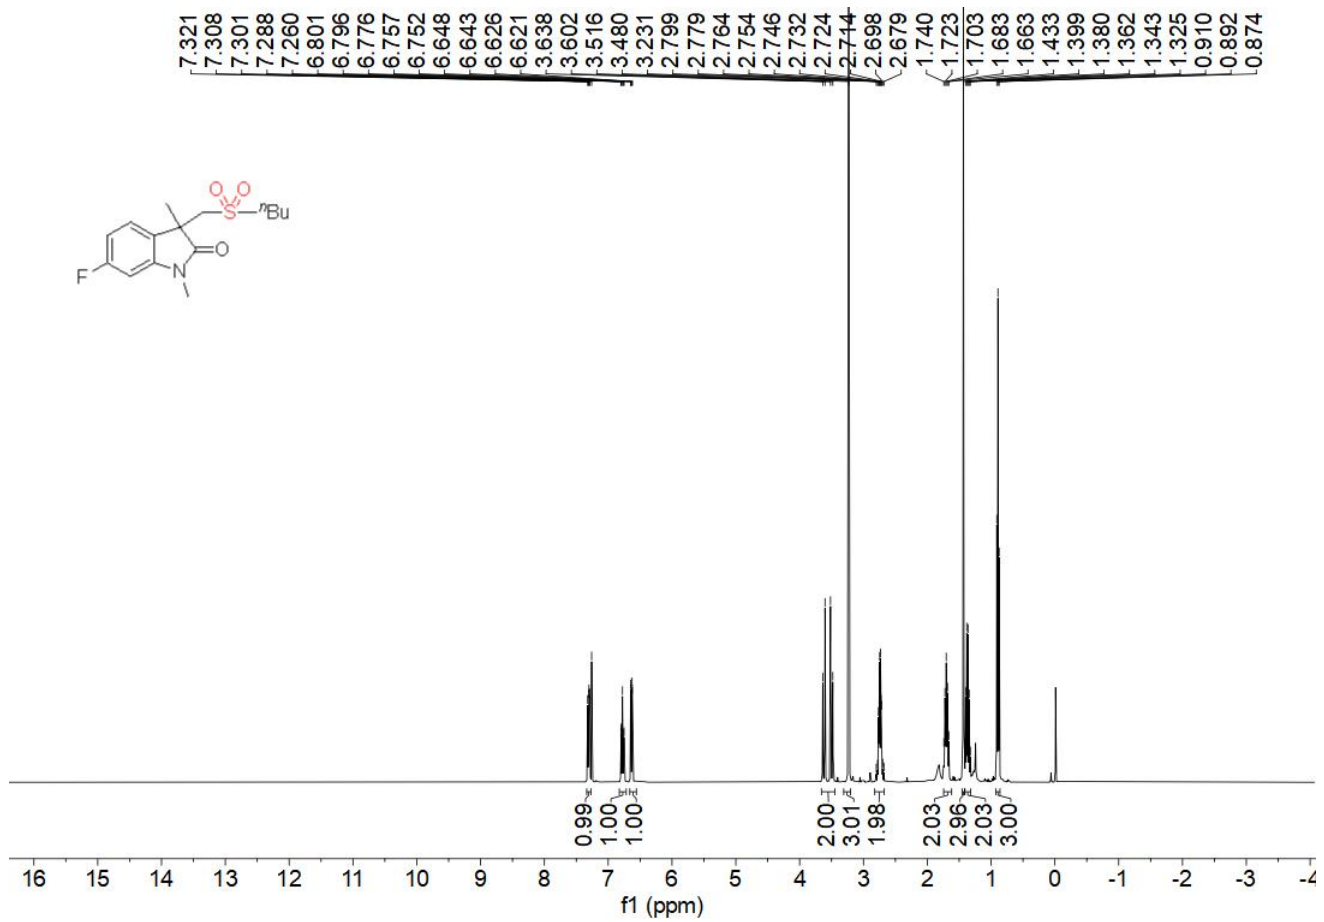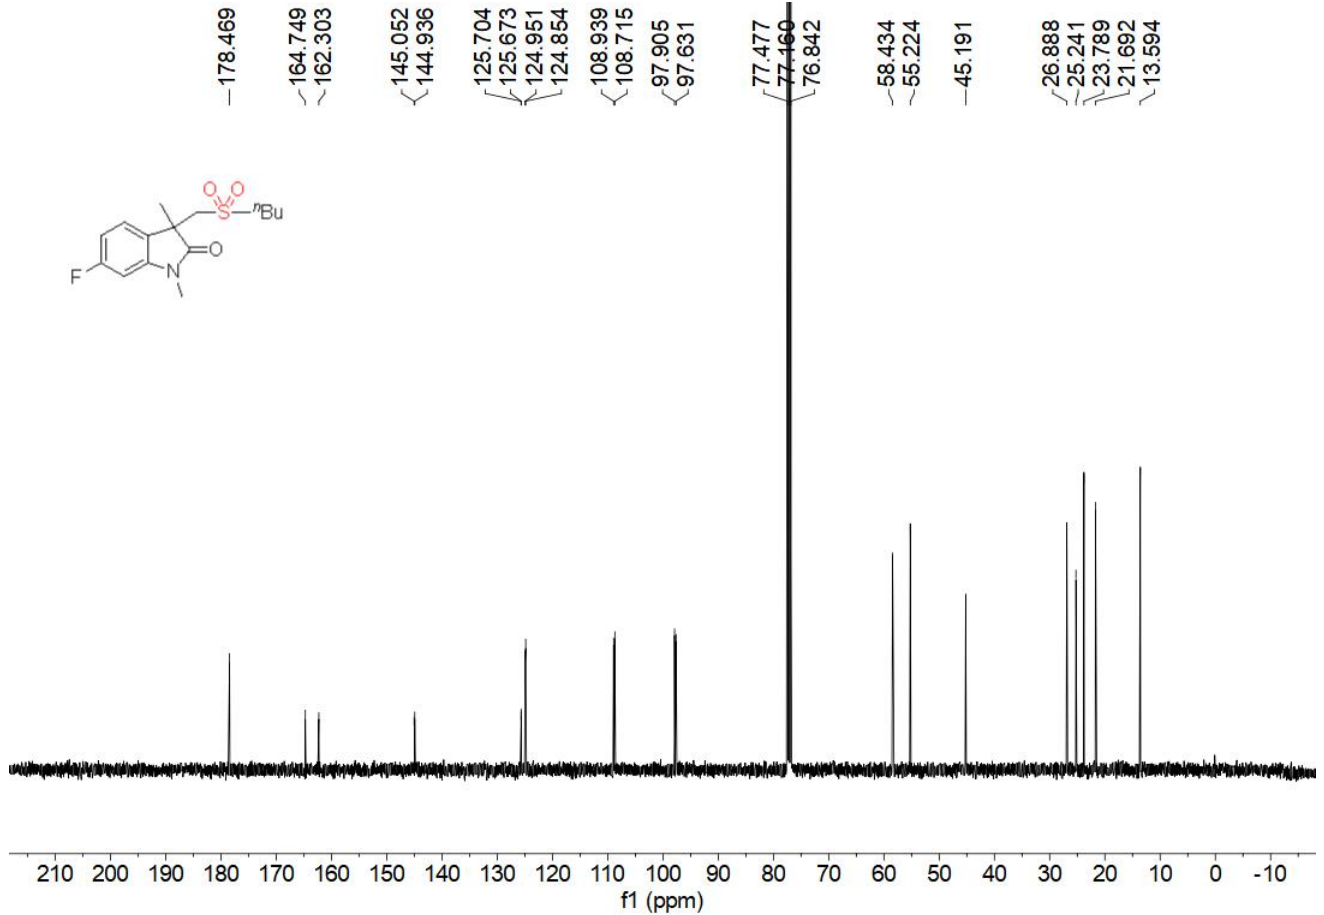

--110.882

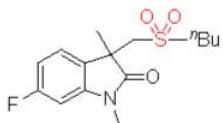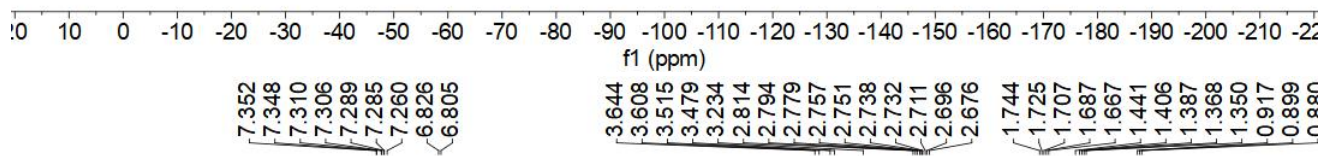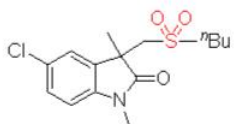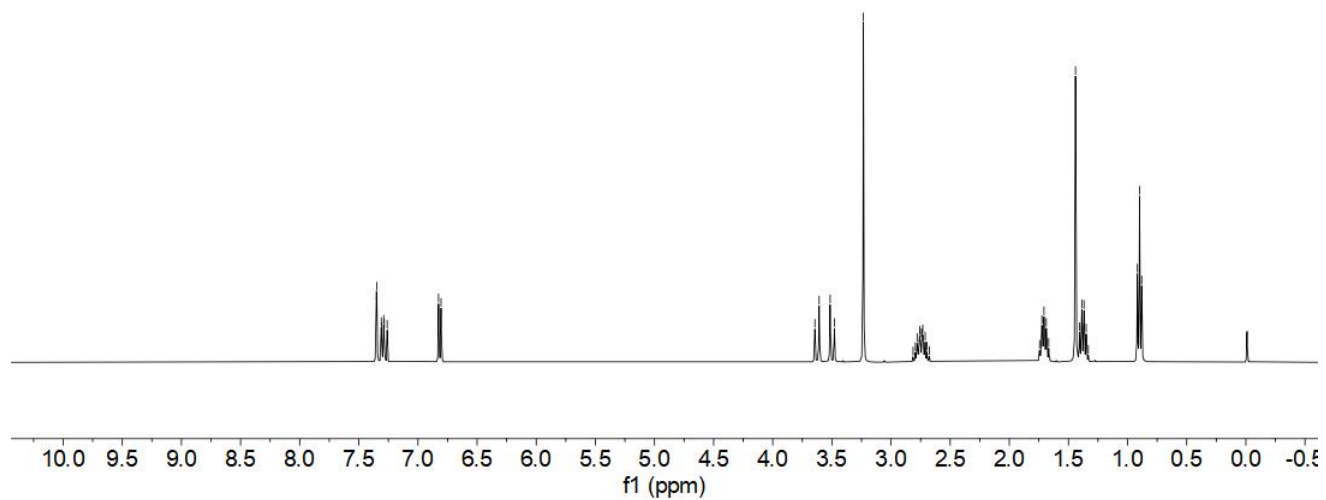



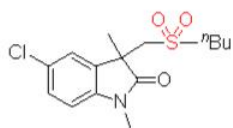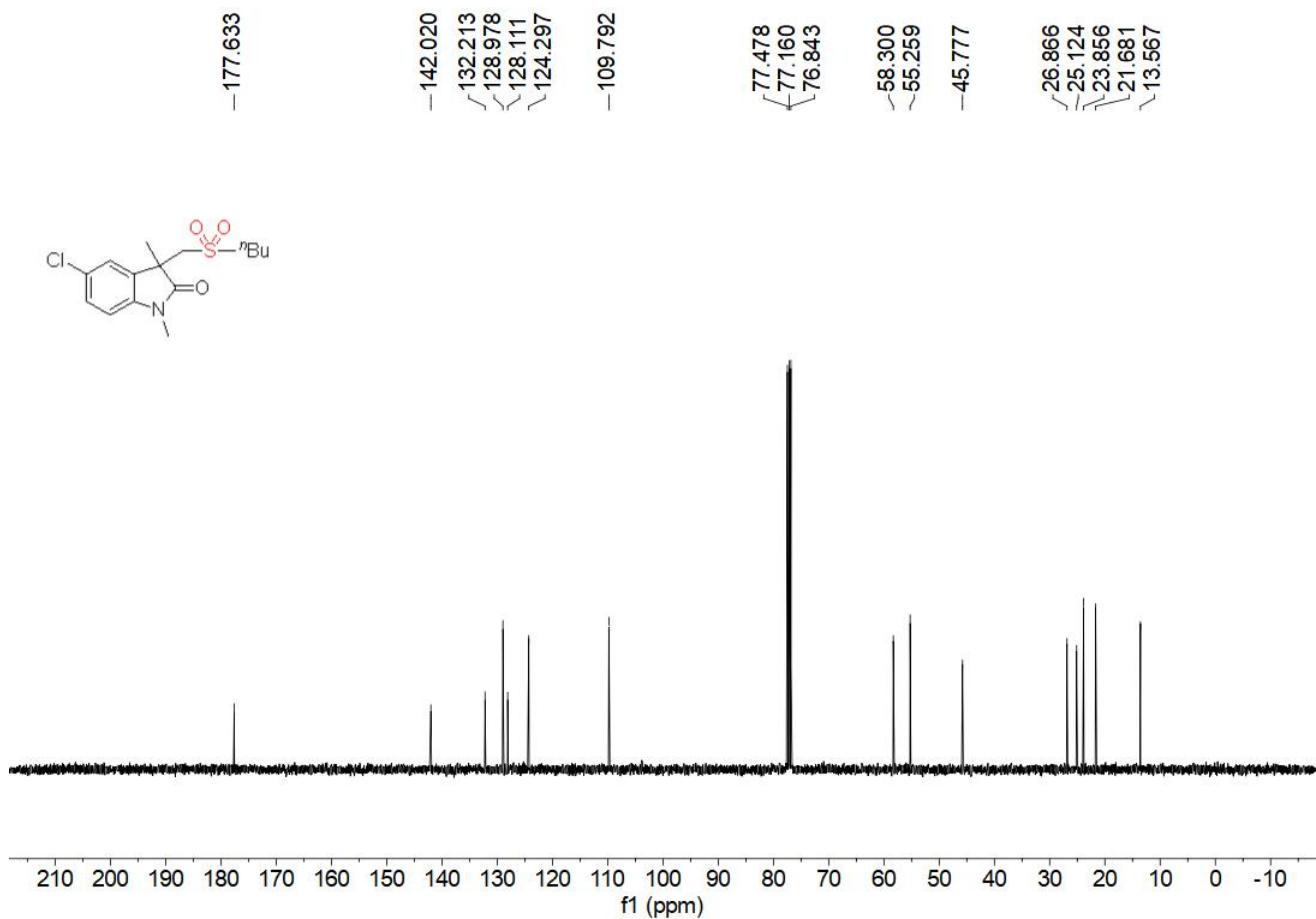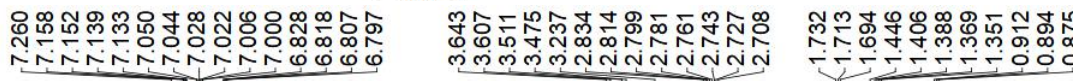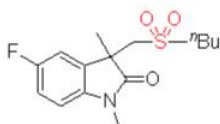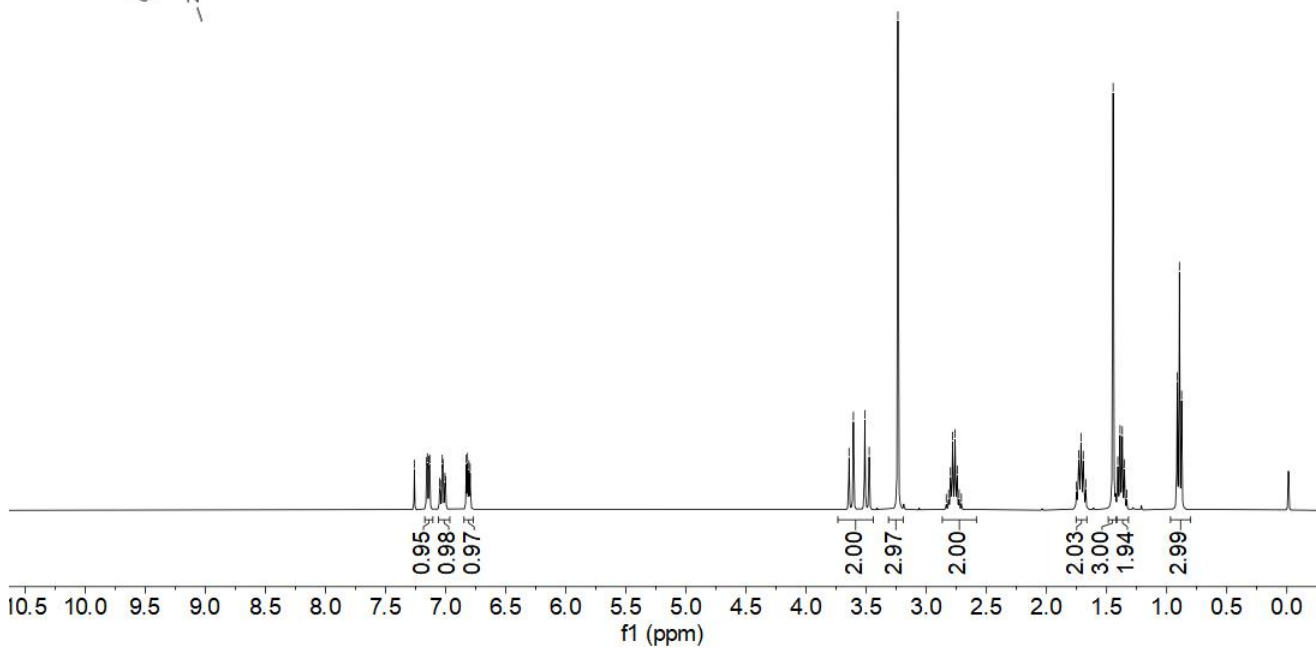

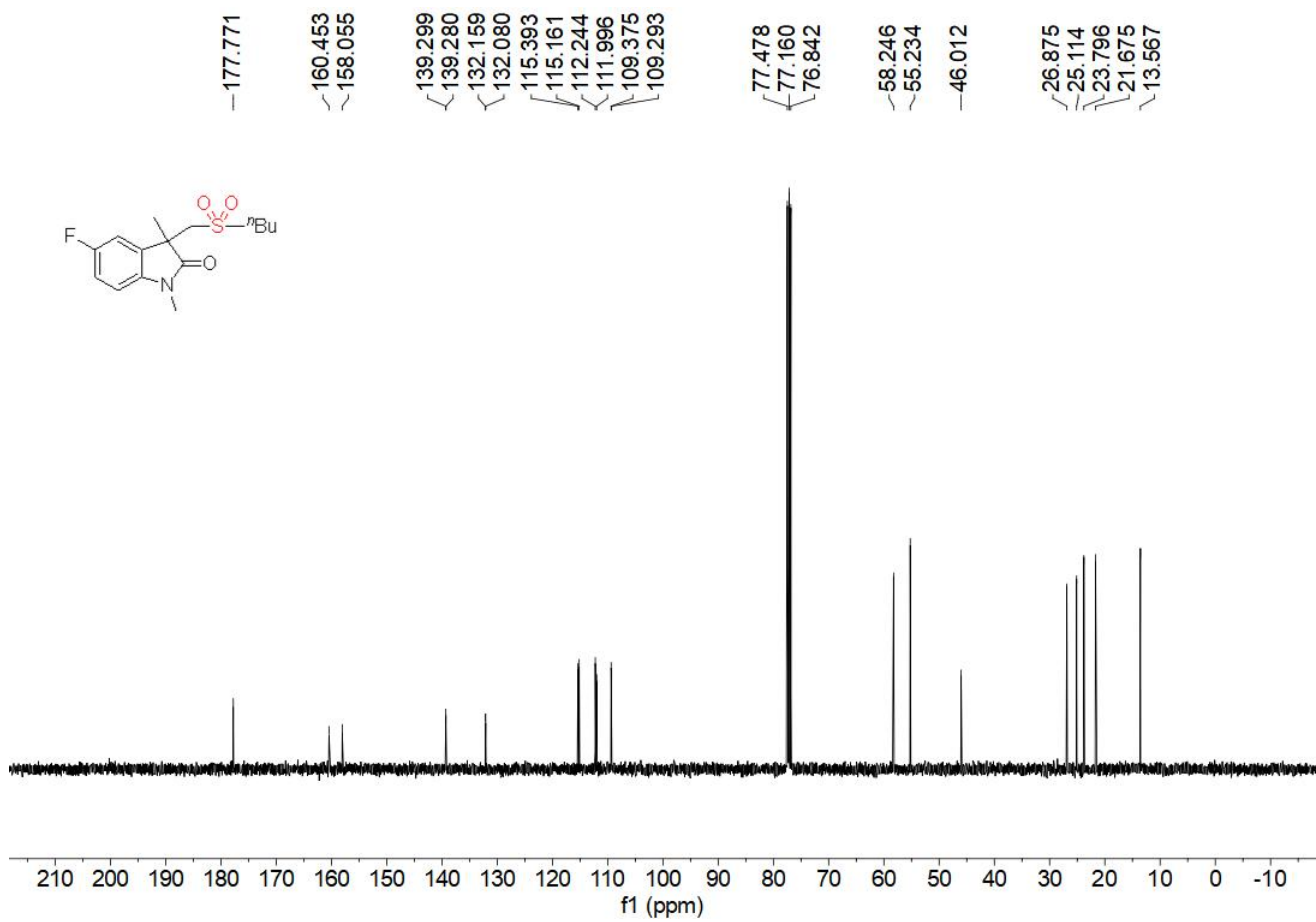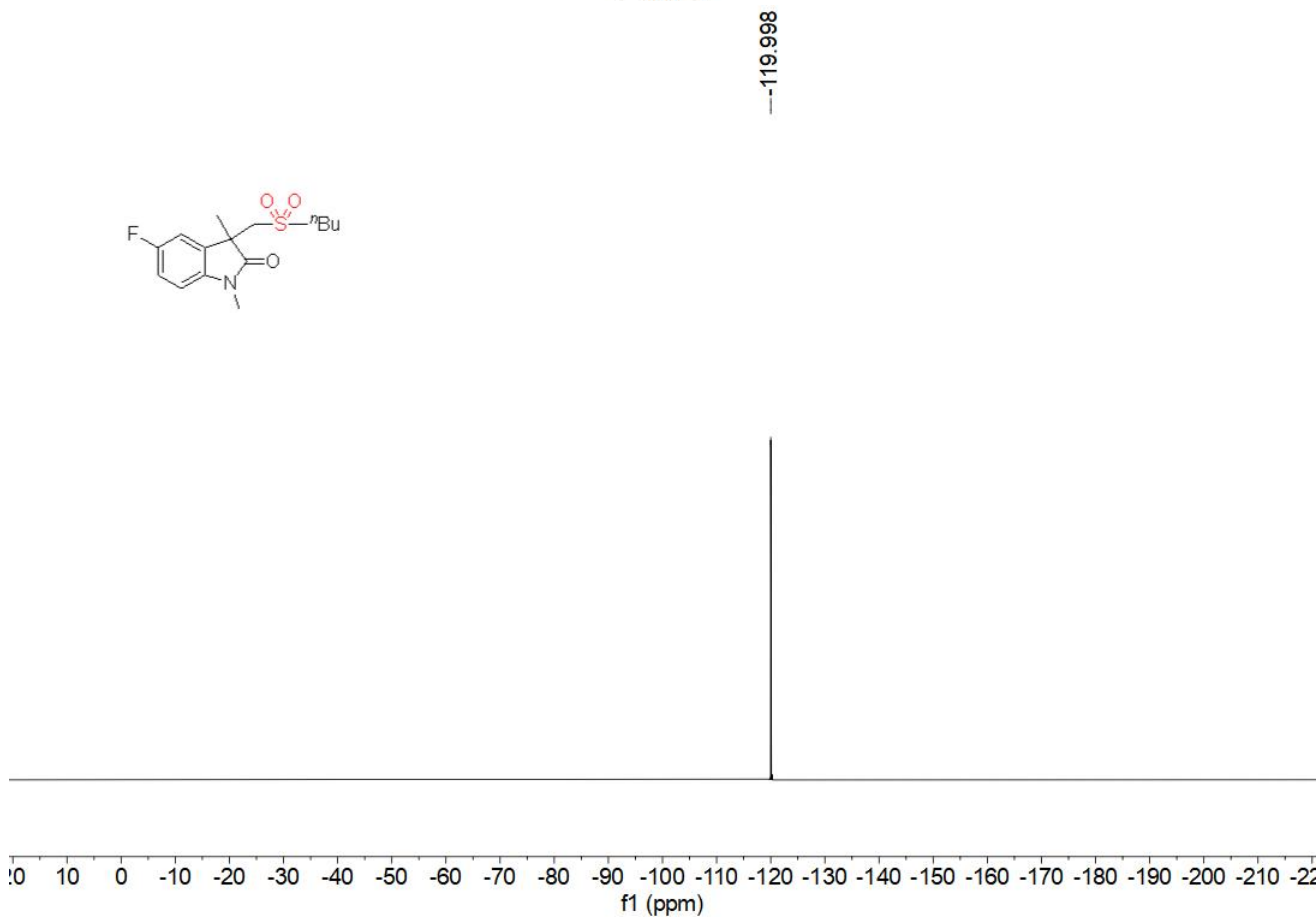

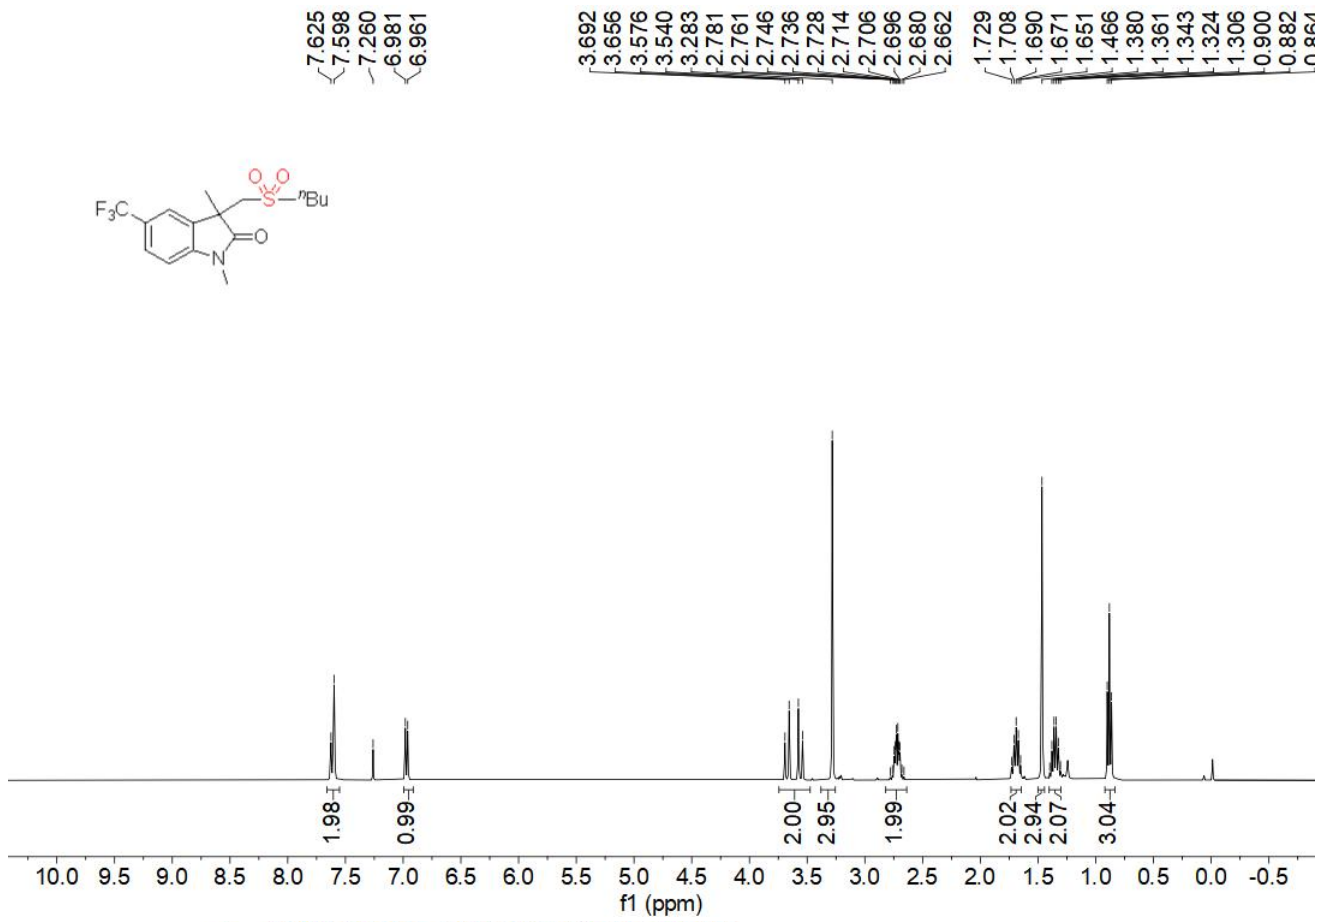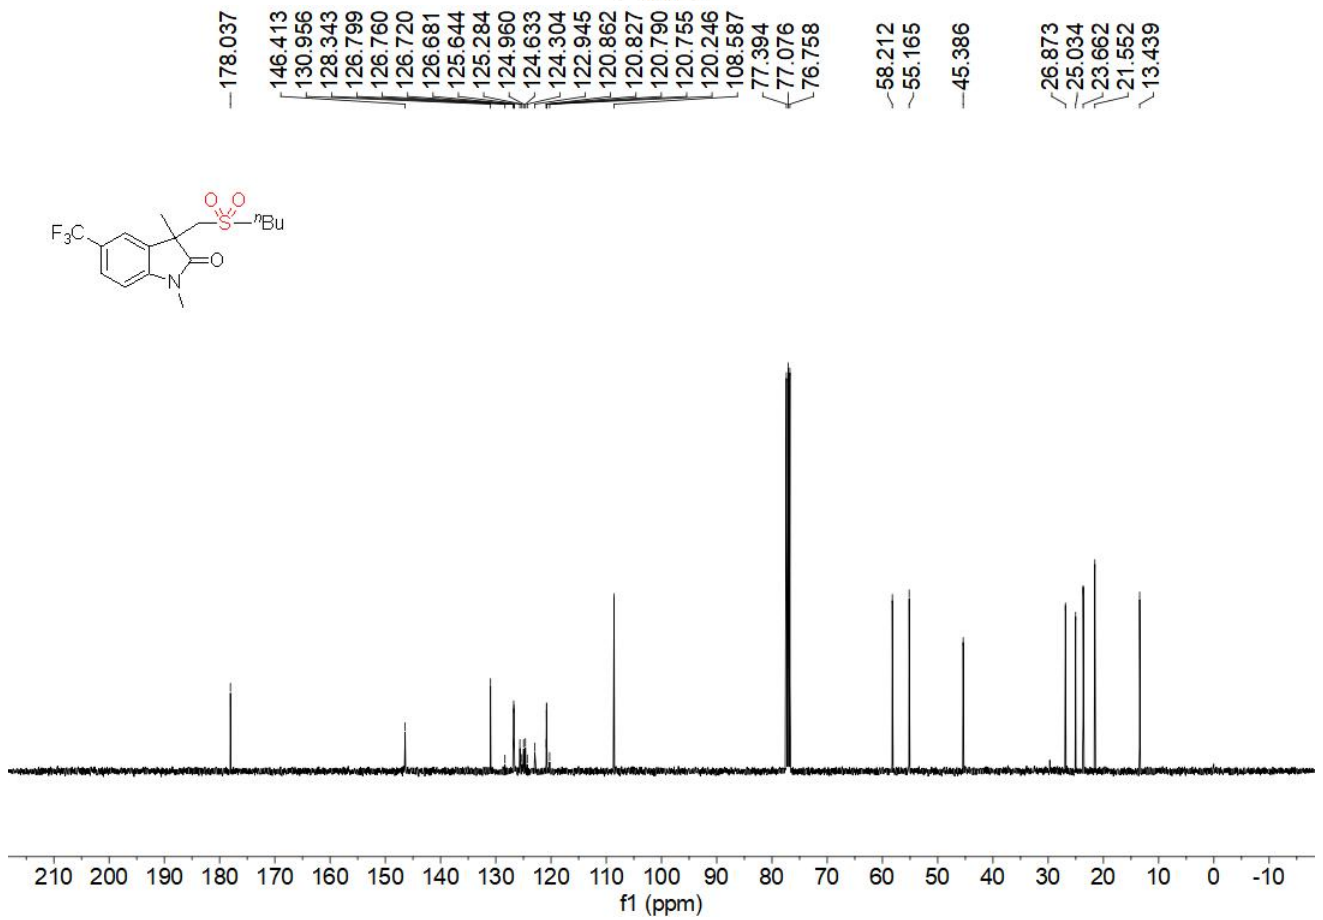

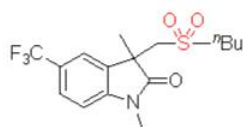

-61.361

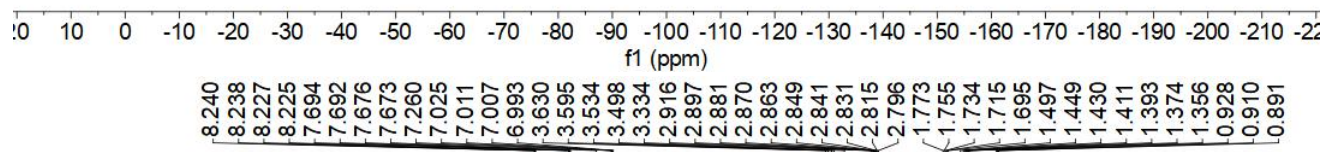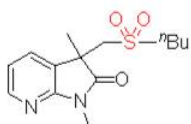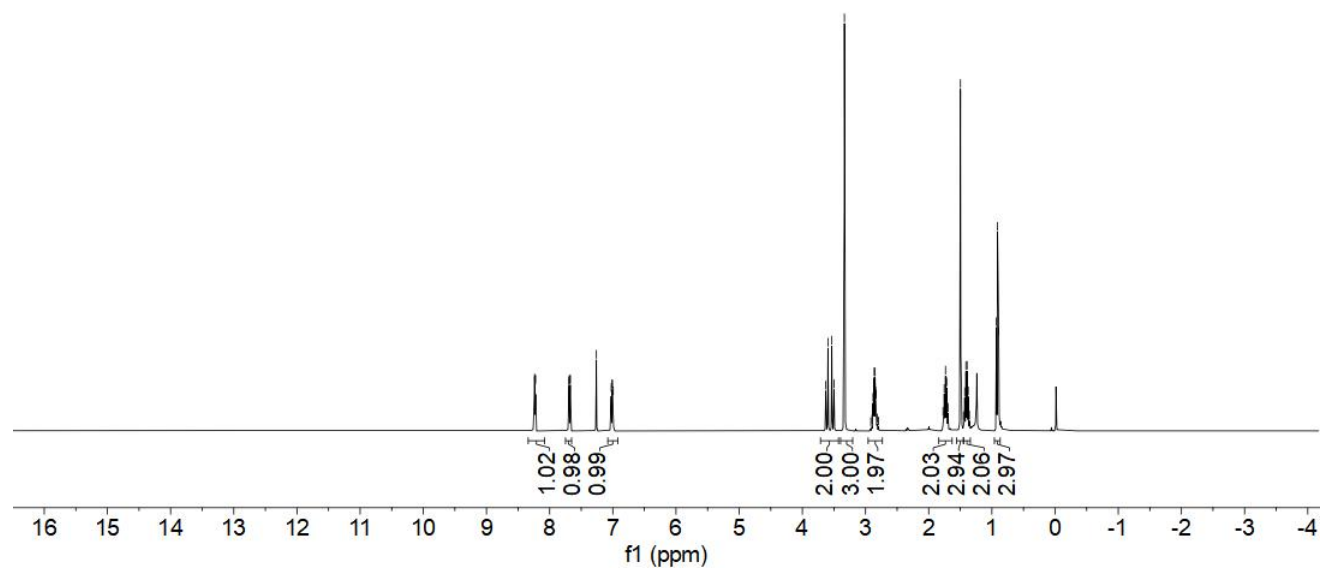

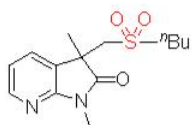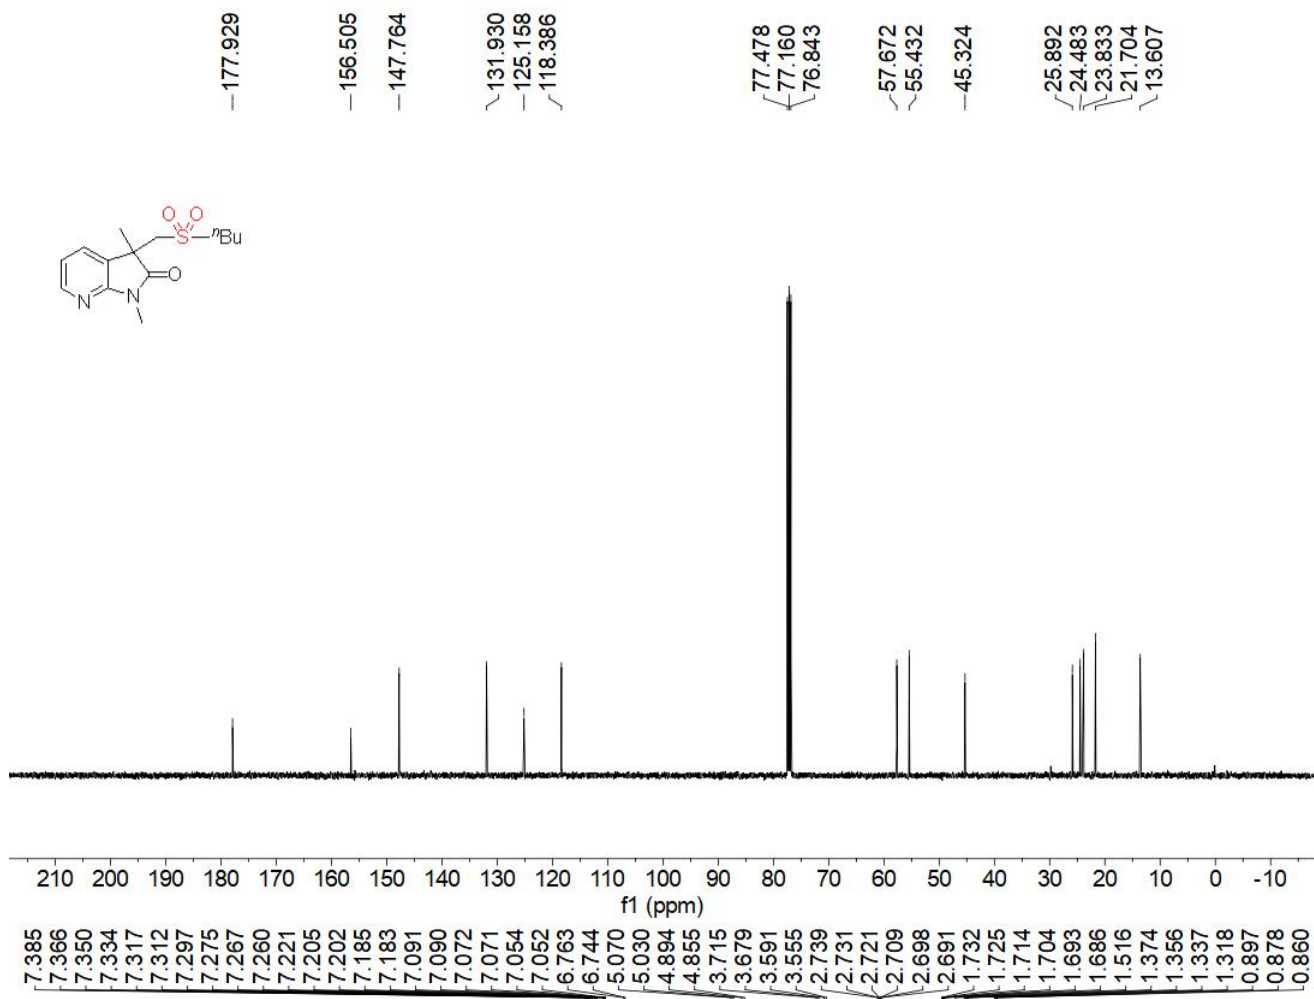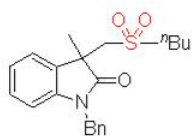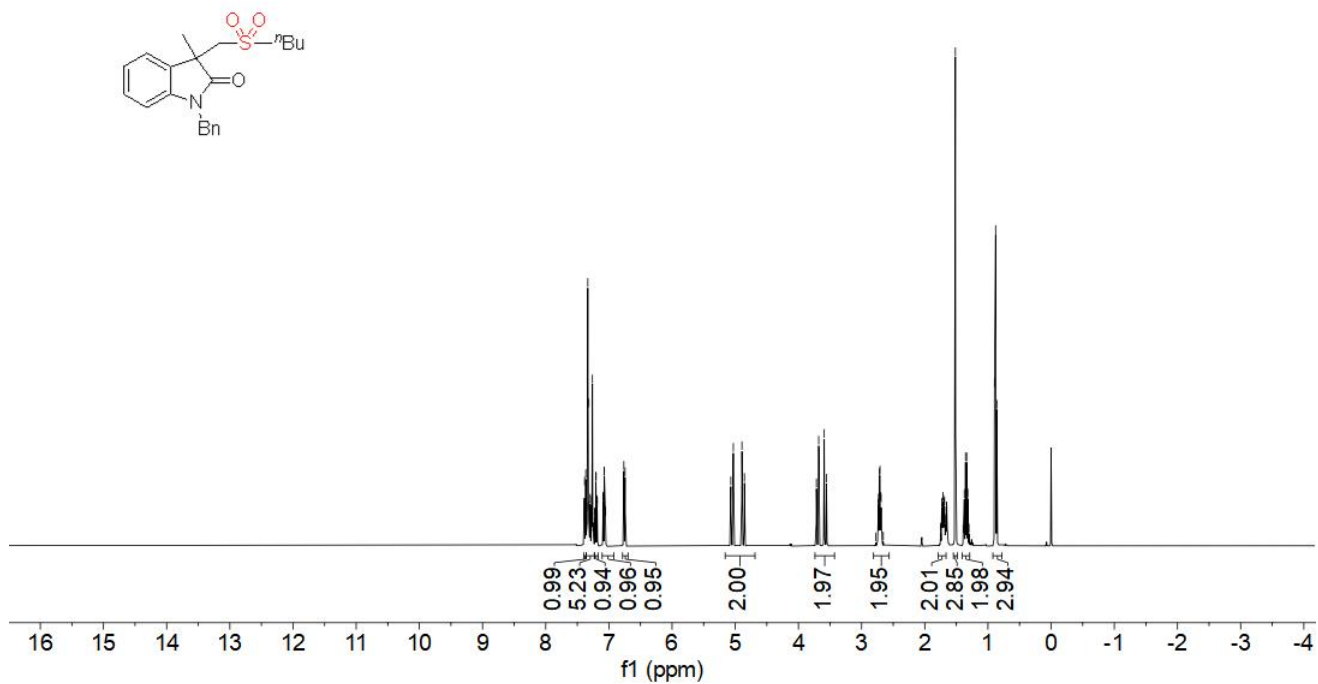

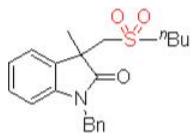

-178.152

142.546  
135.790  
130.514  
128.934  
128.876  
127.693  
127.358  
123.670  
122.730  
-109.972

77.478  
77.160  
76.842

58.369  
55.070  
45.697  
44.321

25.807  
23.803  
21.653  
13.566

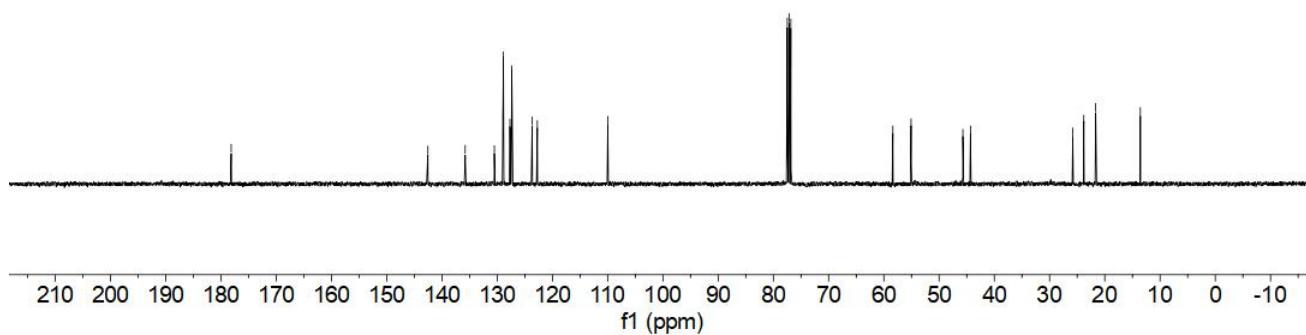

7.375  
7.356  
7.335  
7.316  
7.260  
7.125  
7.106  
7.087  
6.912  
6.892

3.649  
3.613  
3.540  
3.504  
3.255  
2.780  
2.761  
2.727  
2.744  
2.709  
2.691  
2.673  
2.656  
2.638  
2.613  
2.602  
1.454  
1.285  
1.266  
1.248

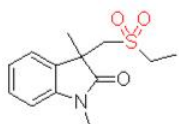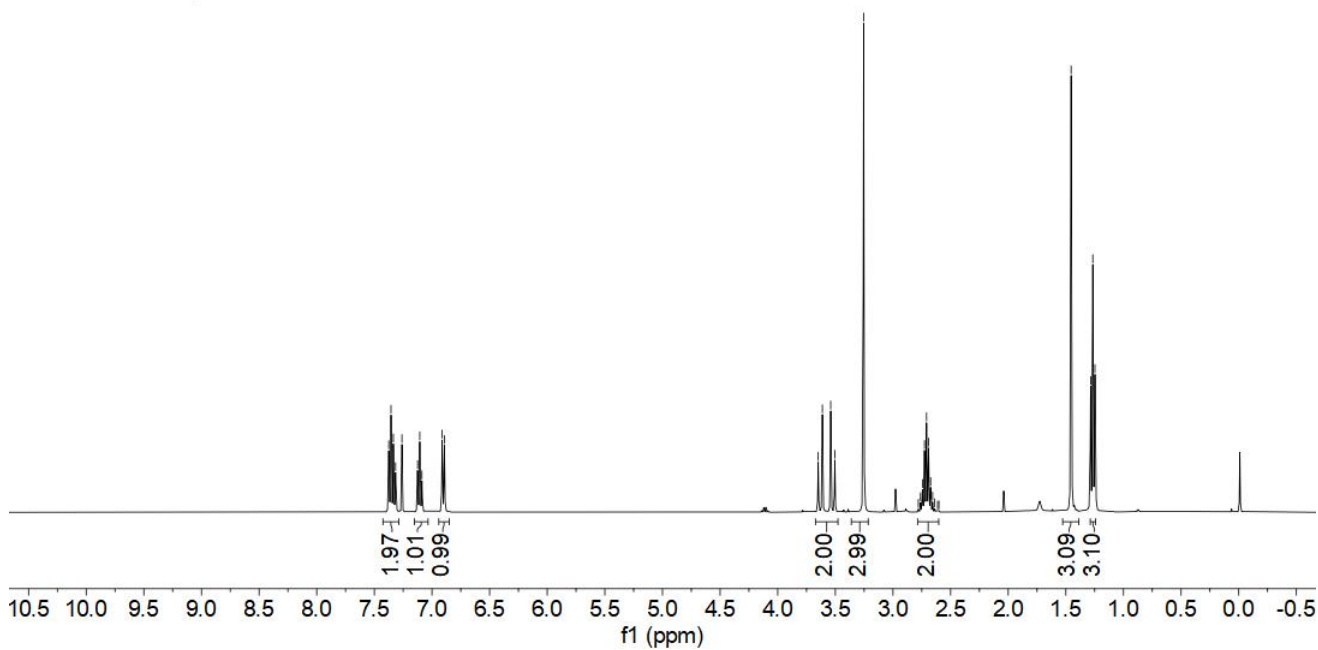

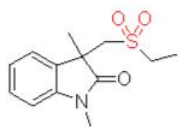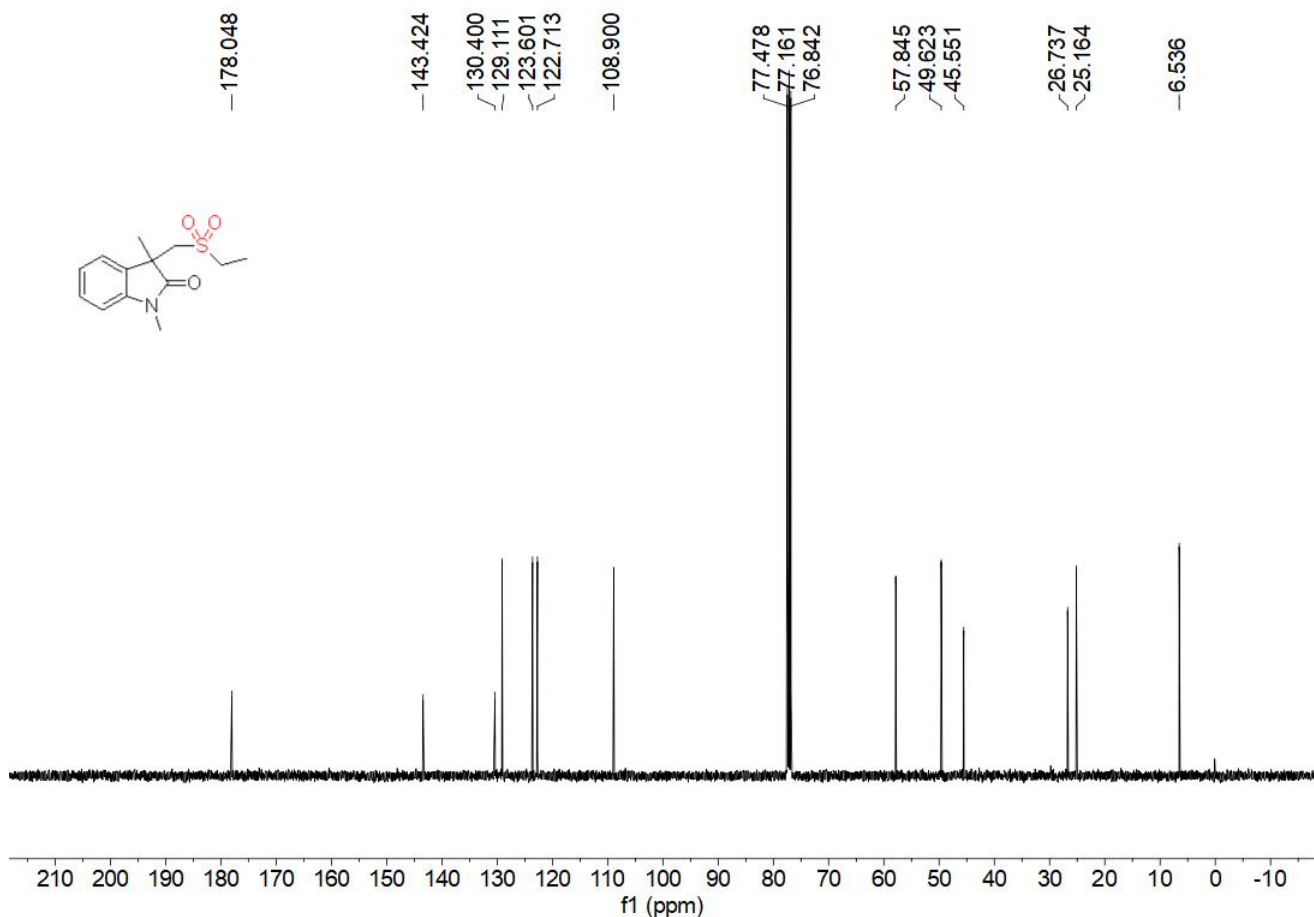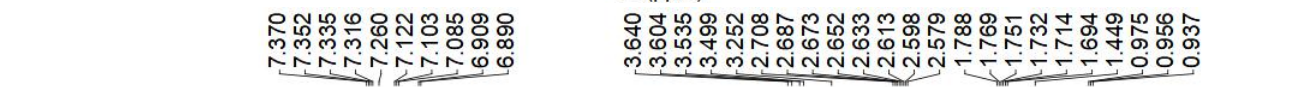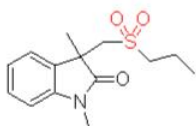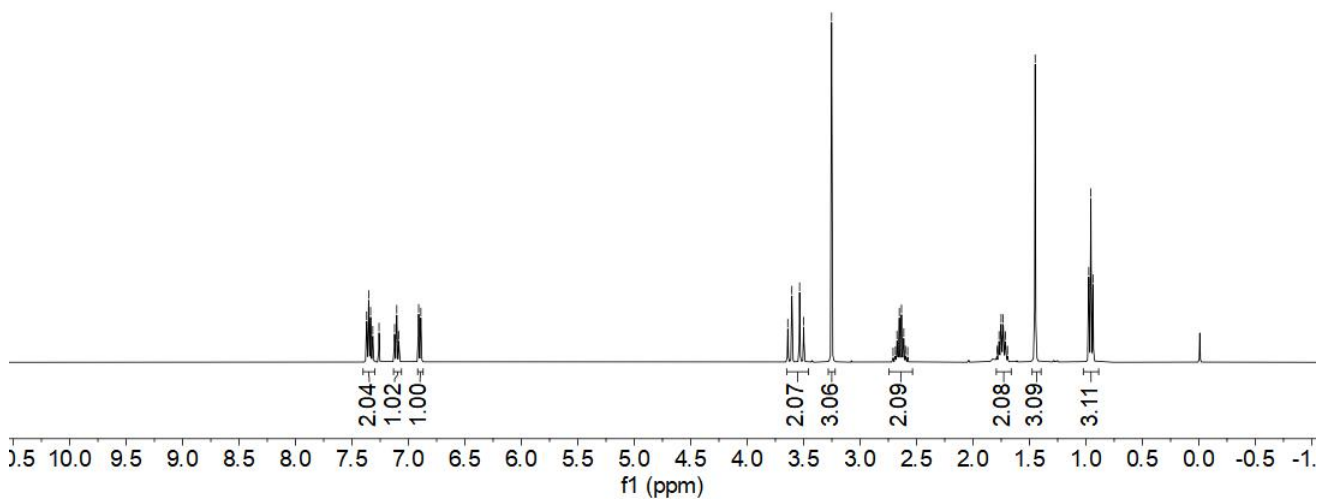



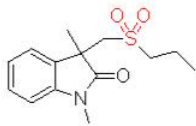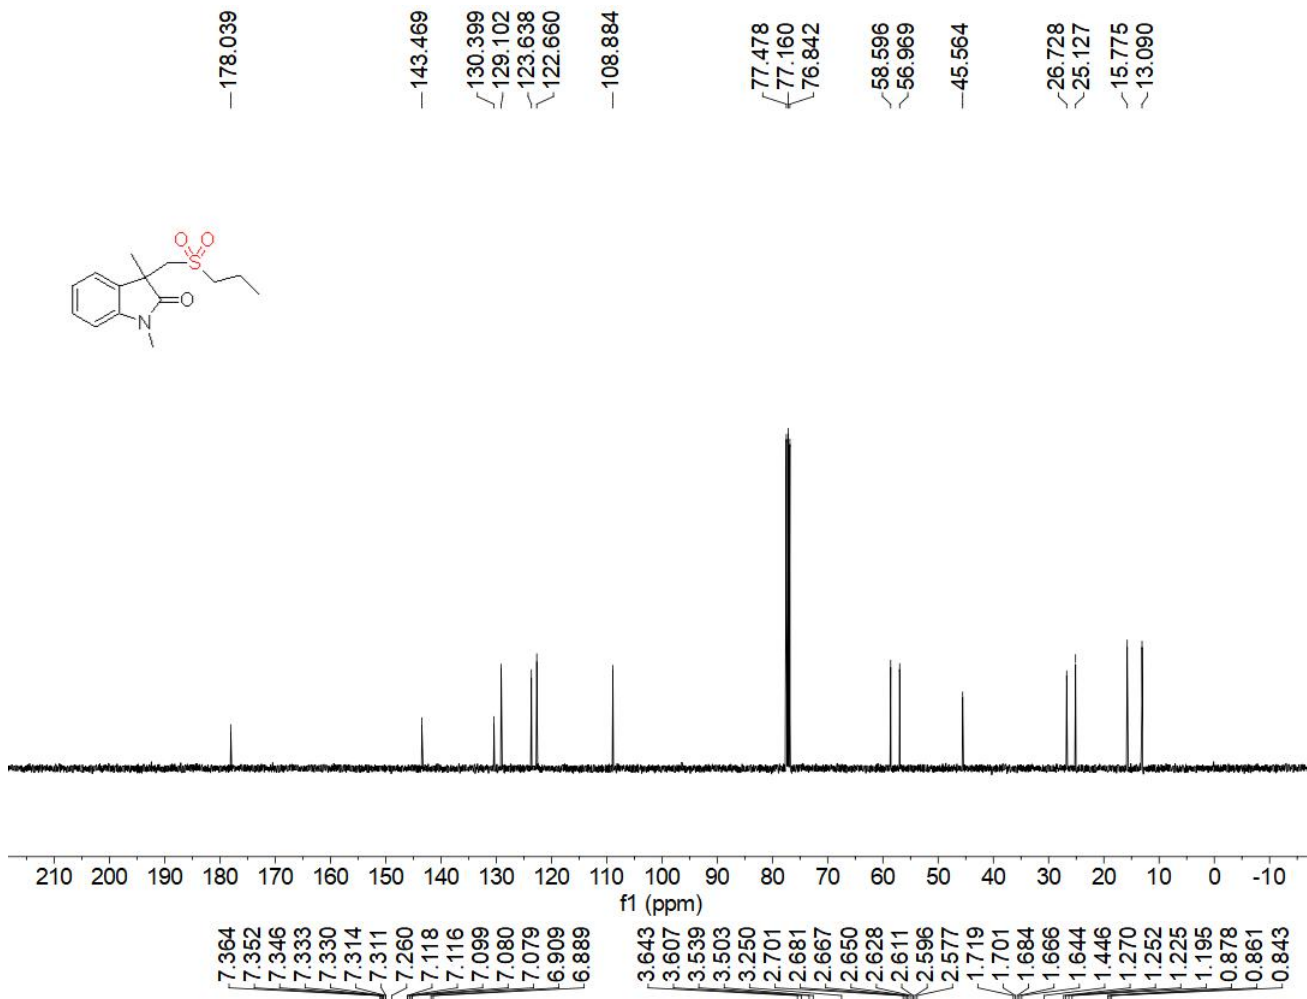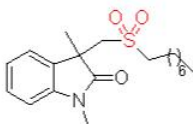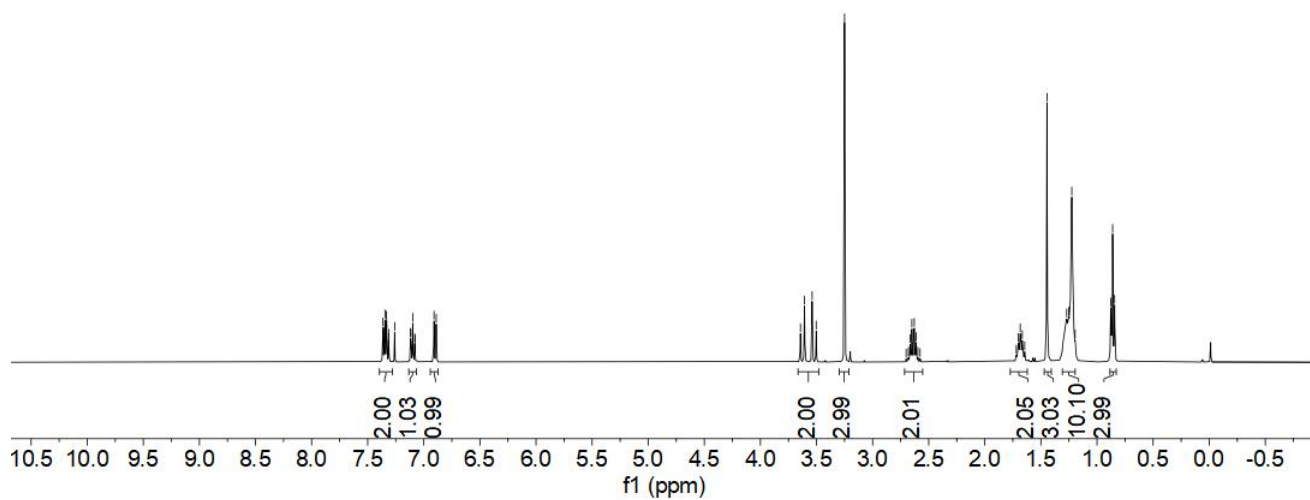



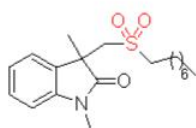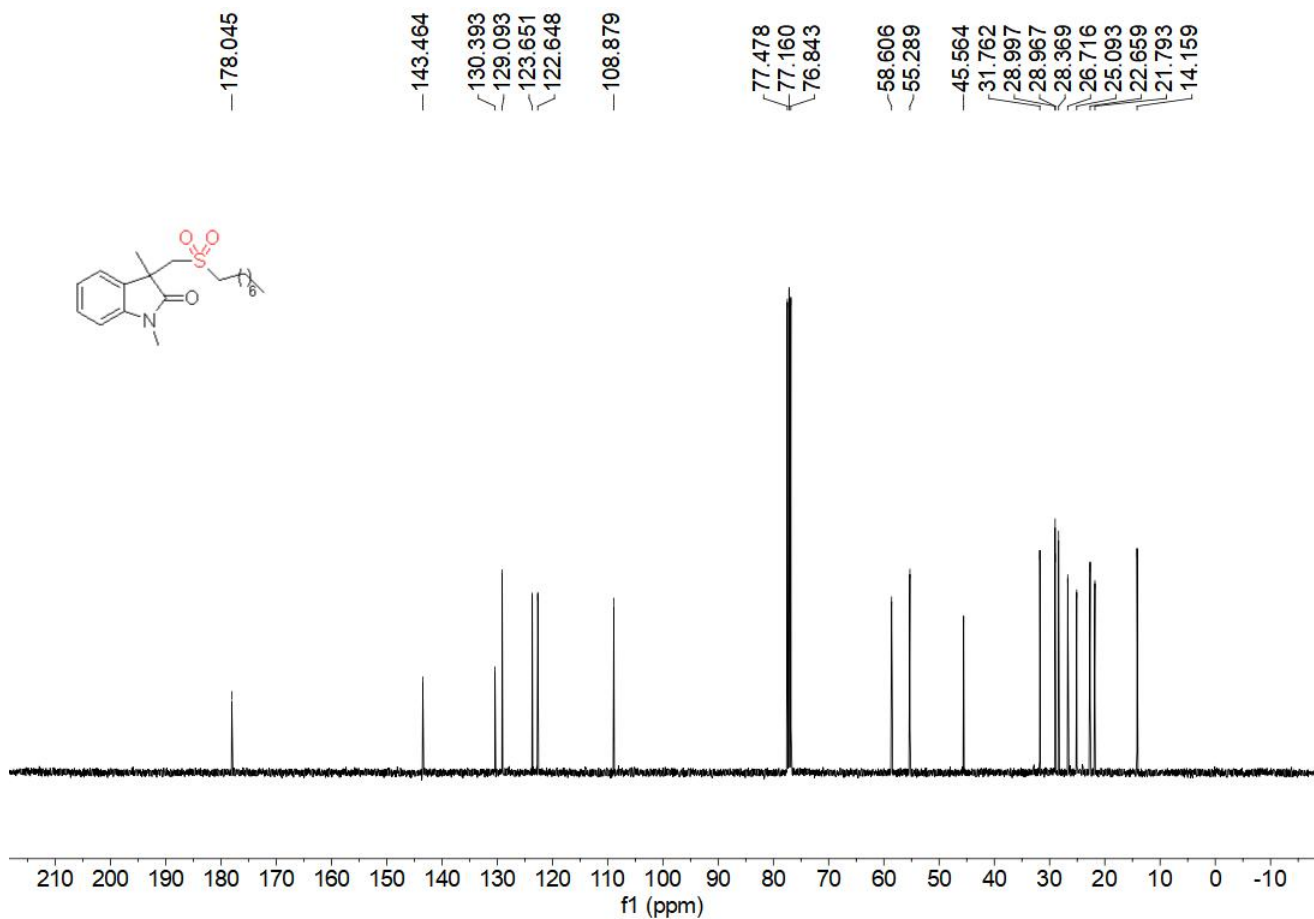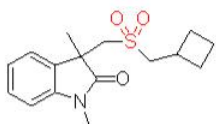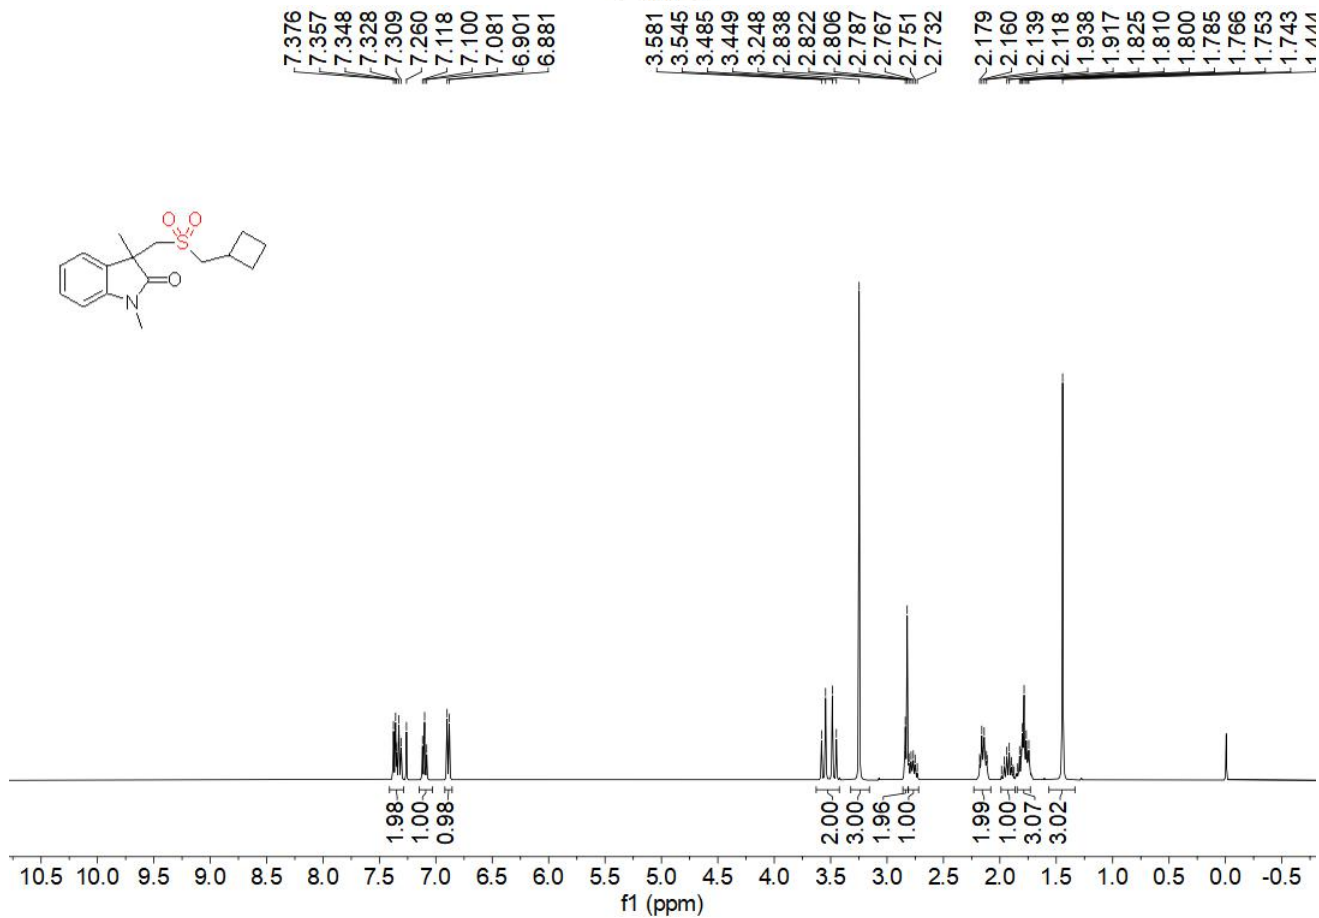

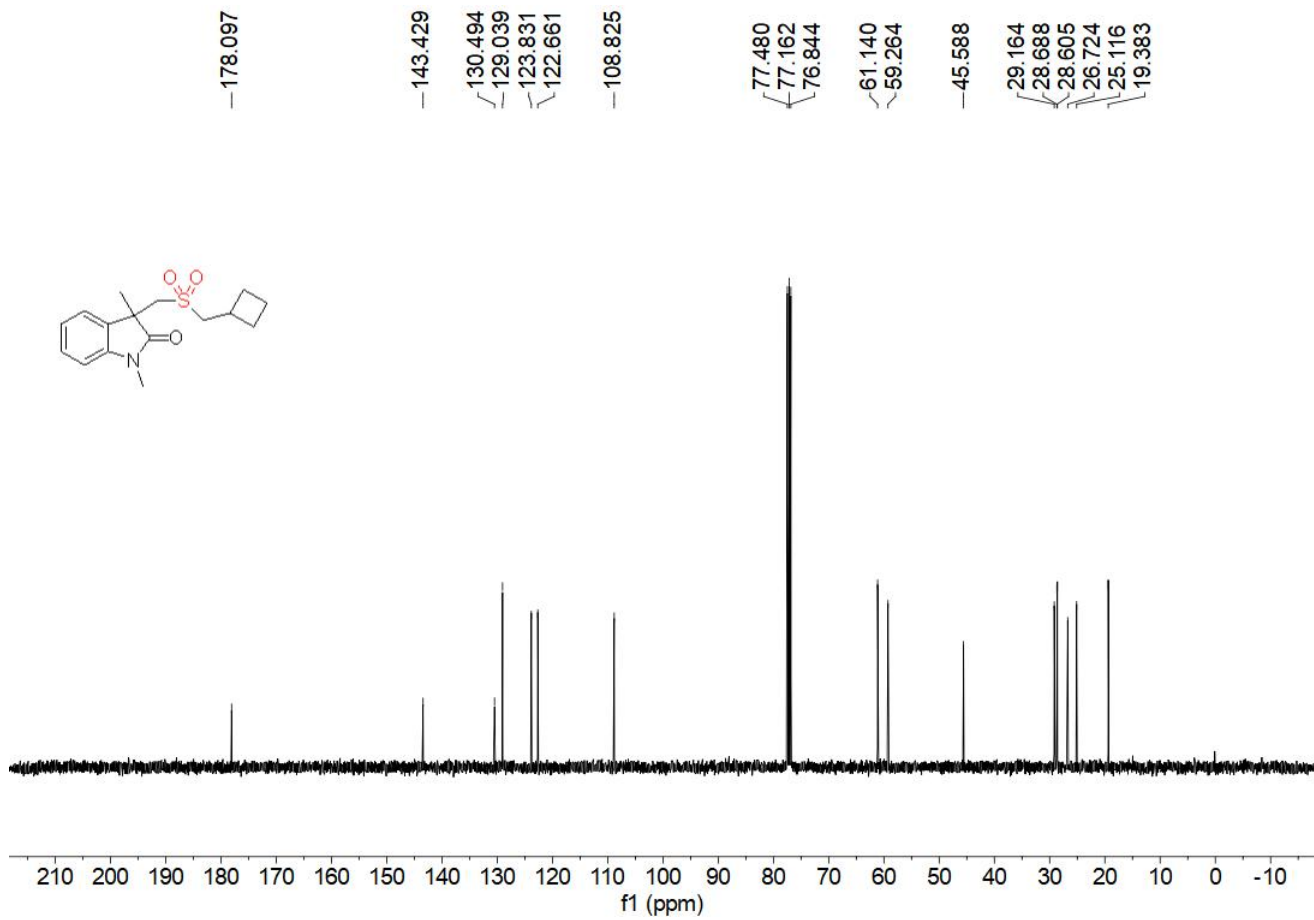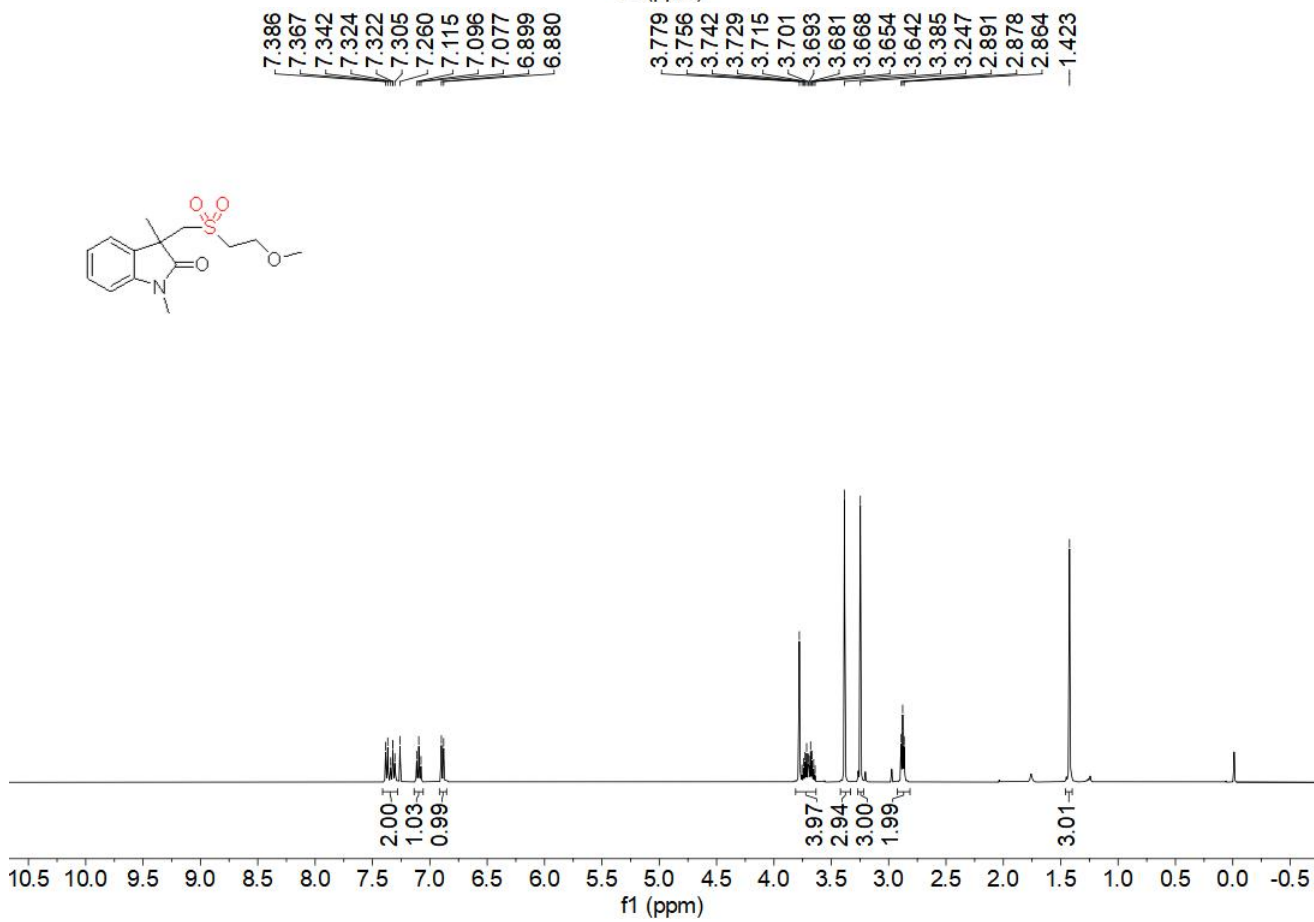

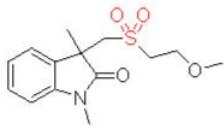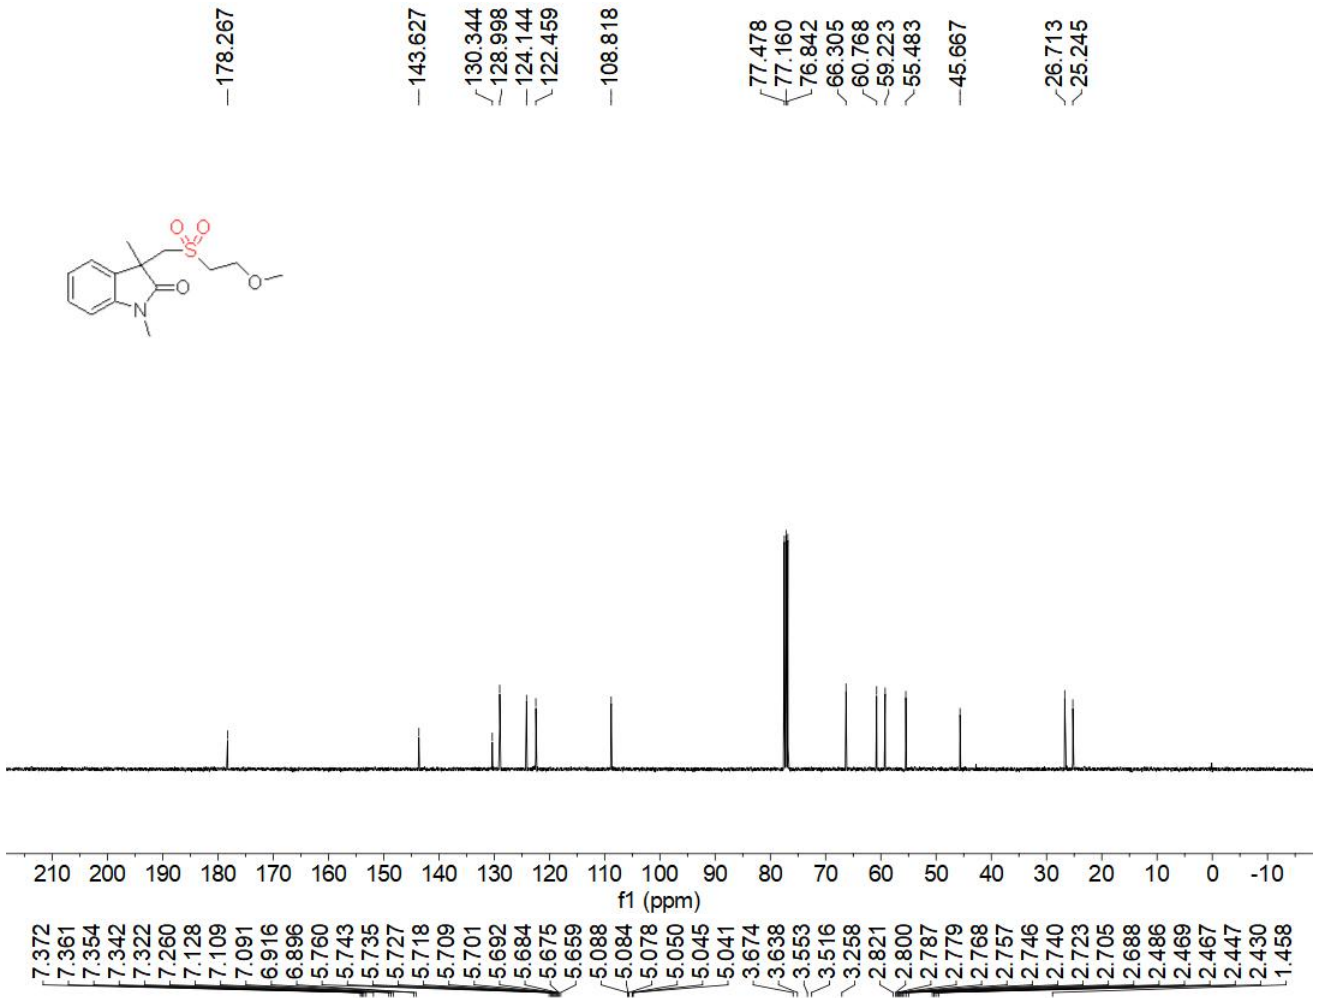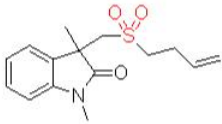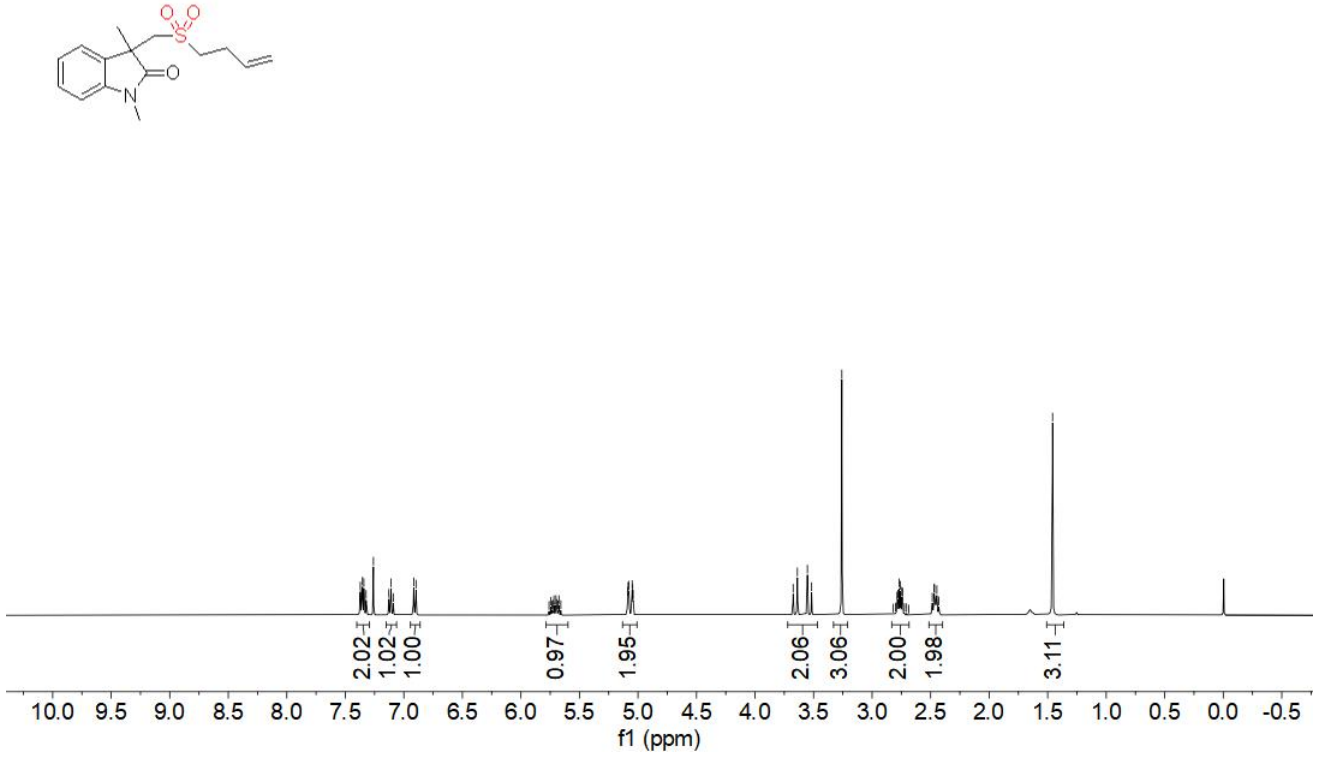

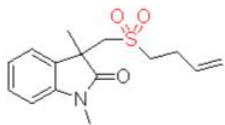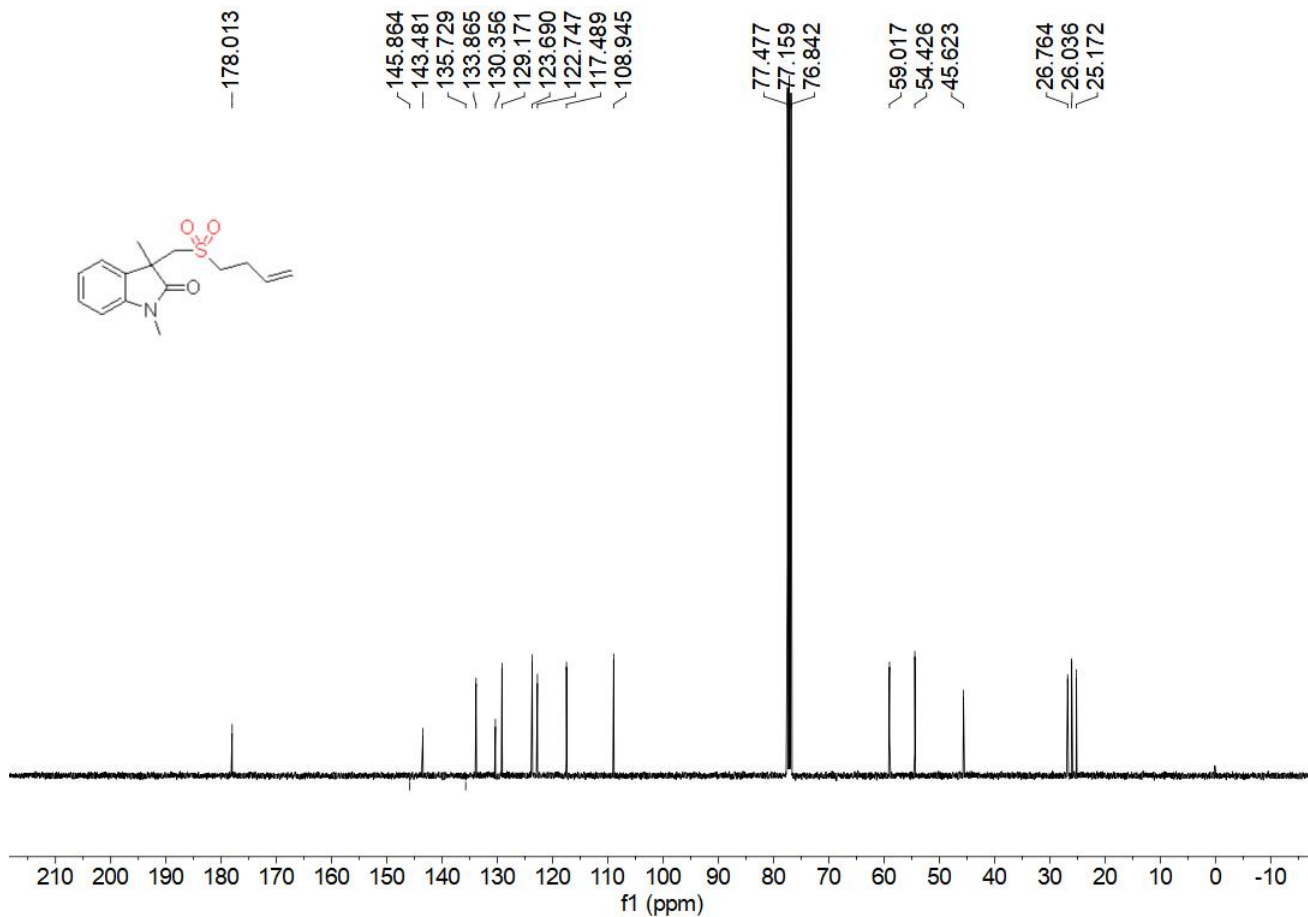

7.363  
7.353  
7.345  
7.334  
7.315  
7.260  
7.119  
7.100  
7.081  
6.908  
6.889  
5.710  
5.693  
5.676  
5.670  
5.664  
5.653  
5.648  
5.642  
5.632  
5.625  
5.608  
5.012  
4.984  
4.972  
4.969  
3.649  
3.612  
3.540  
3.503  
3.249  
2.676  
2.672  
2.660  
2.649  
2.636  
2.104  
2.086  
2.069  
2.052  
1.840  
1.824  
1.816  
1.807  
1.798  
1.789  
1.784  
1.780  
1.767  
1.762  
1.446

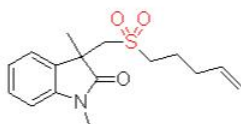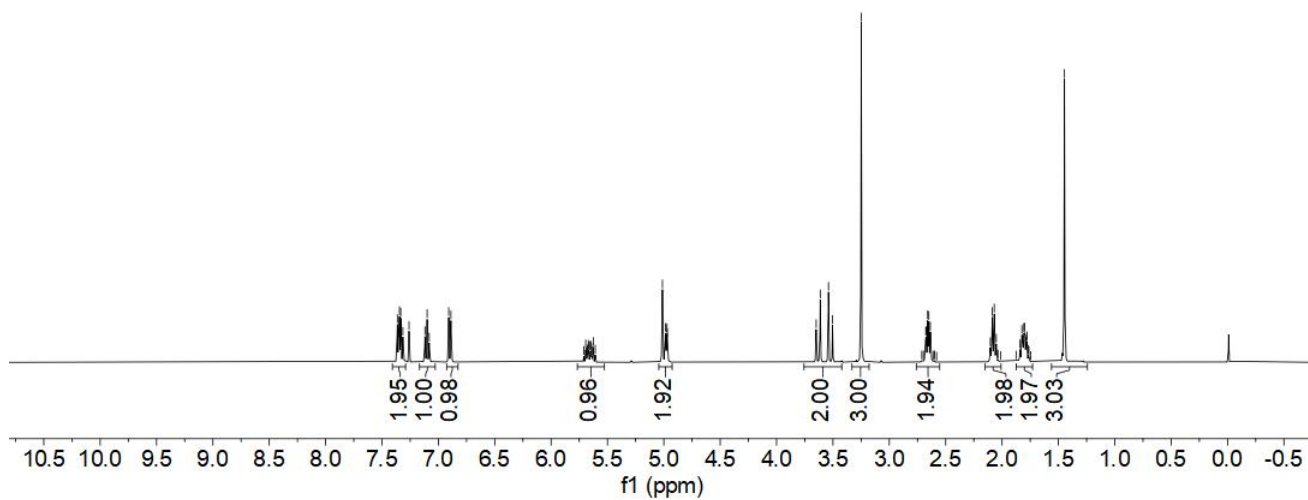

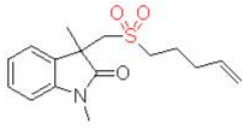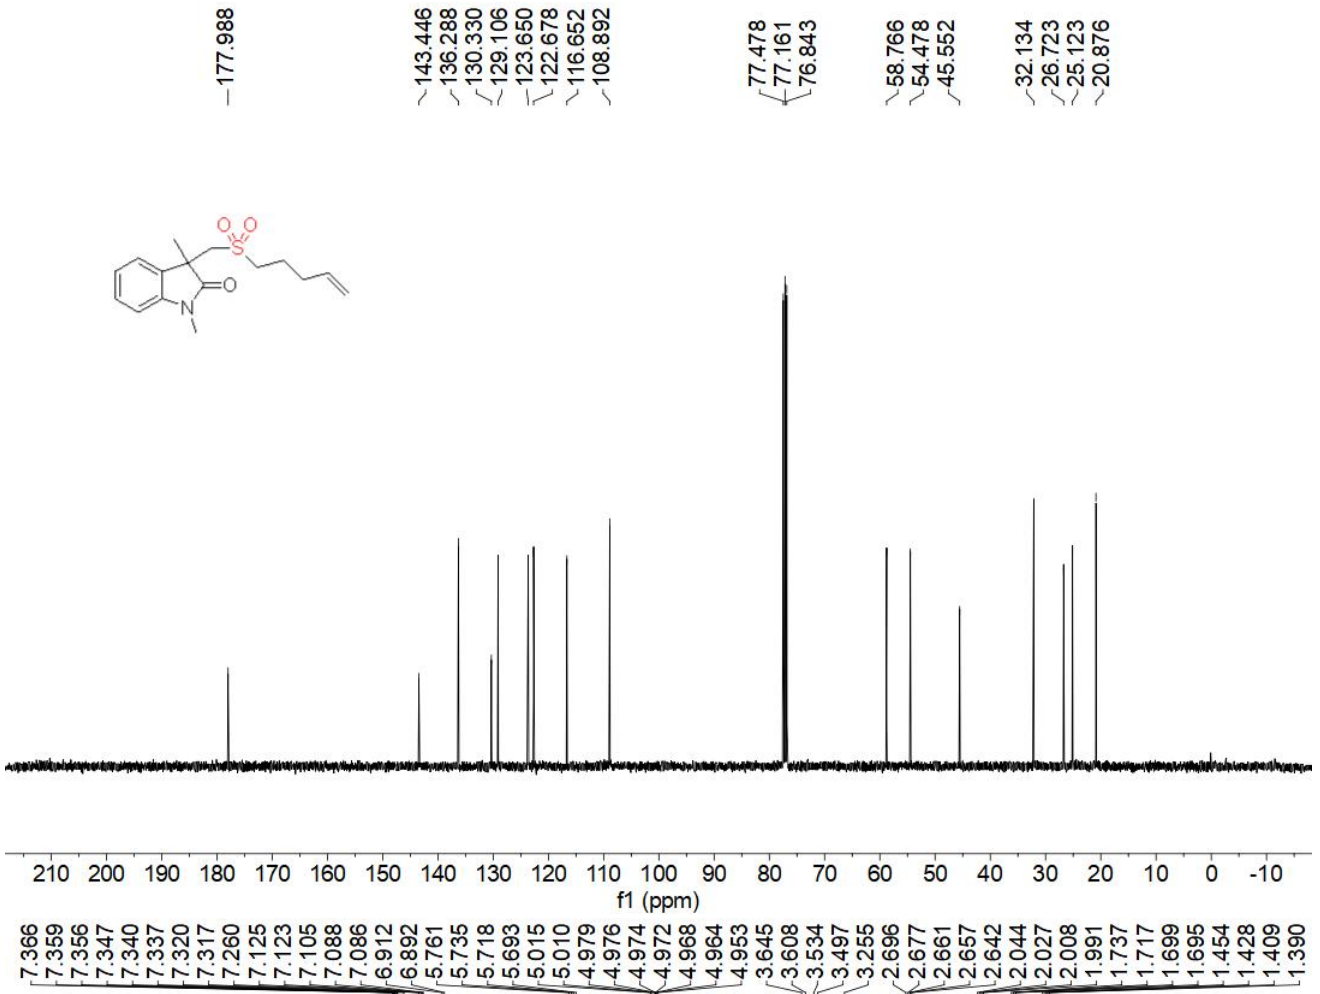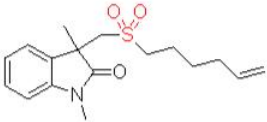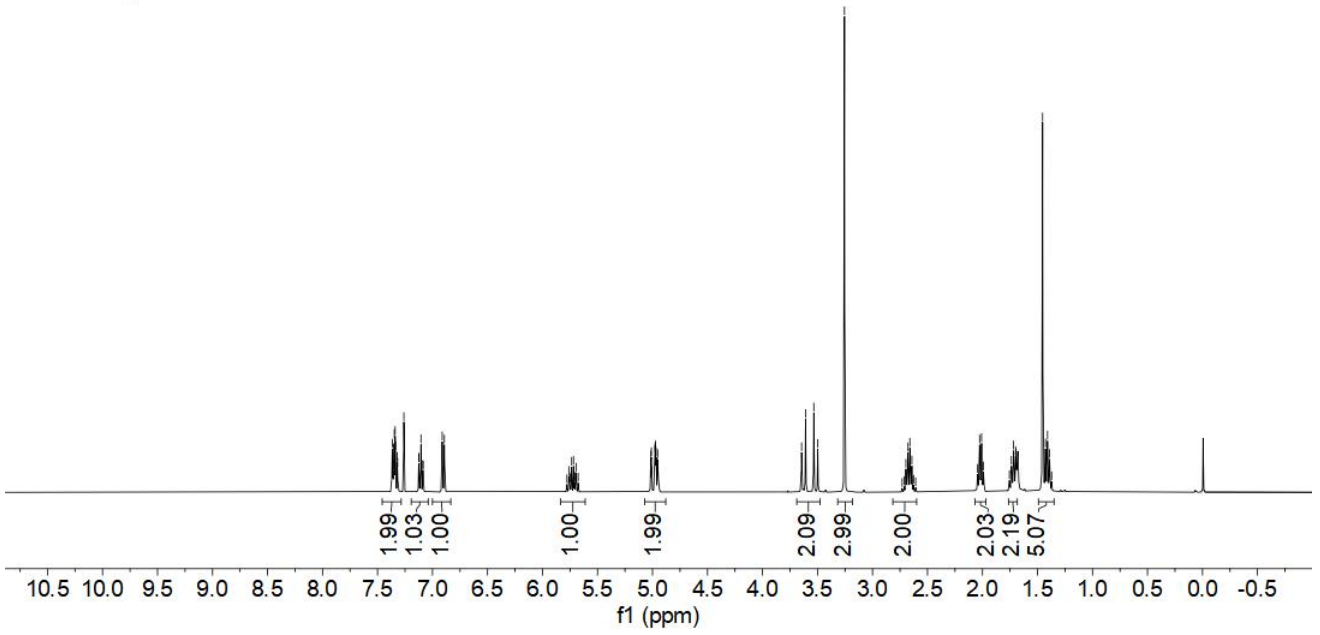

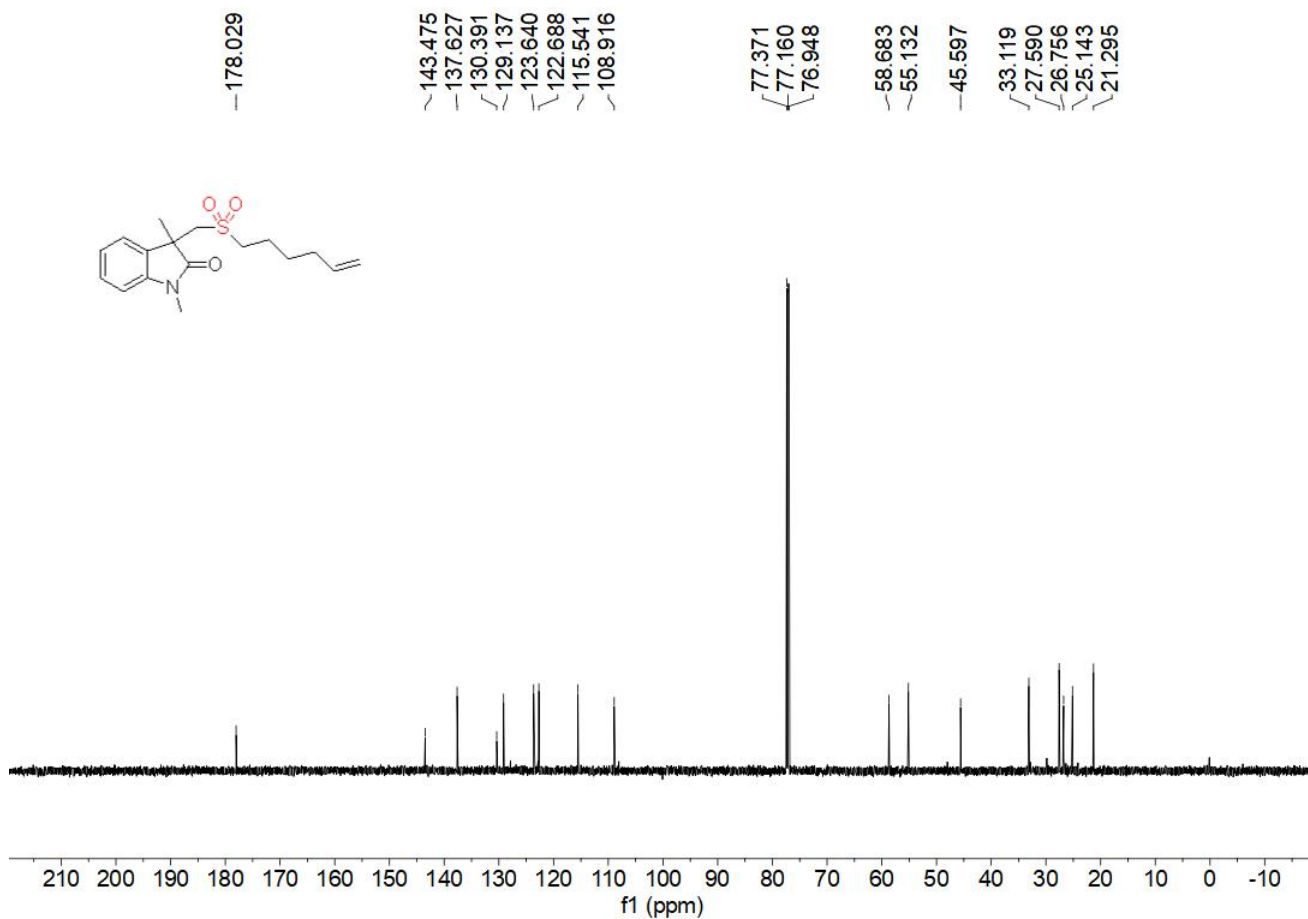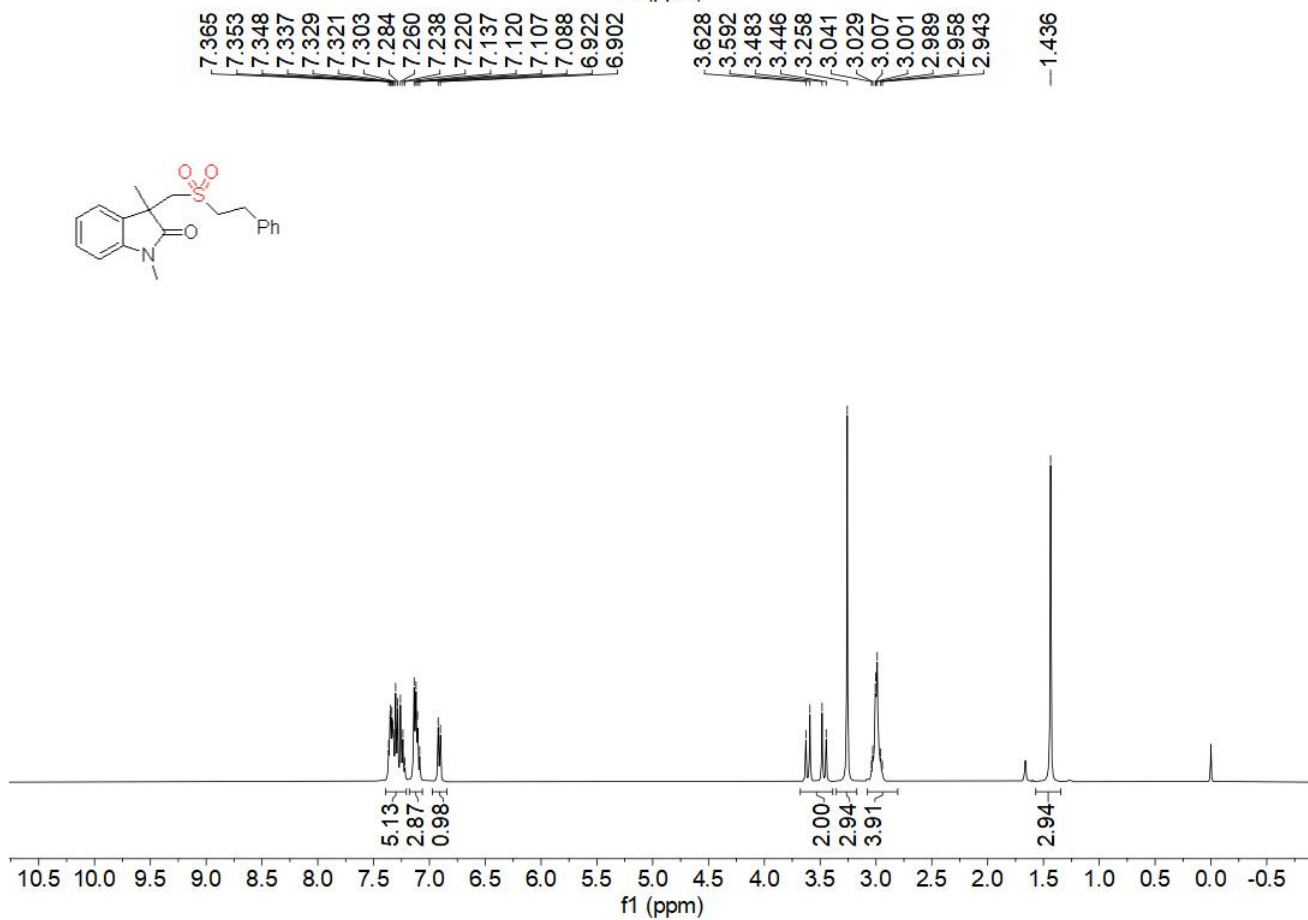



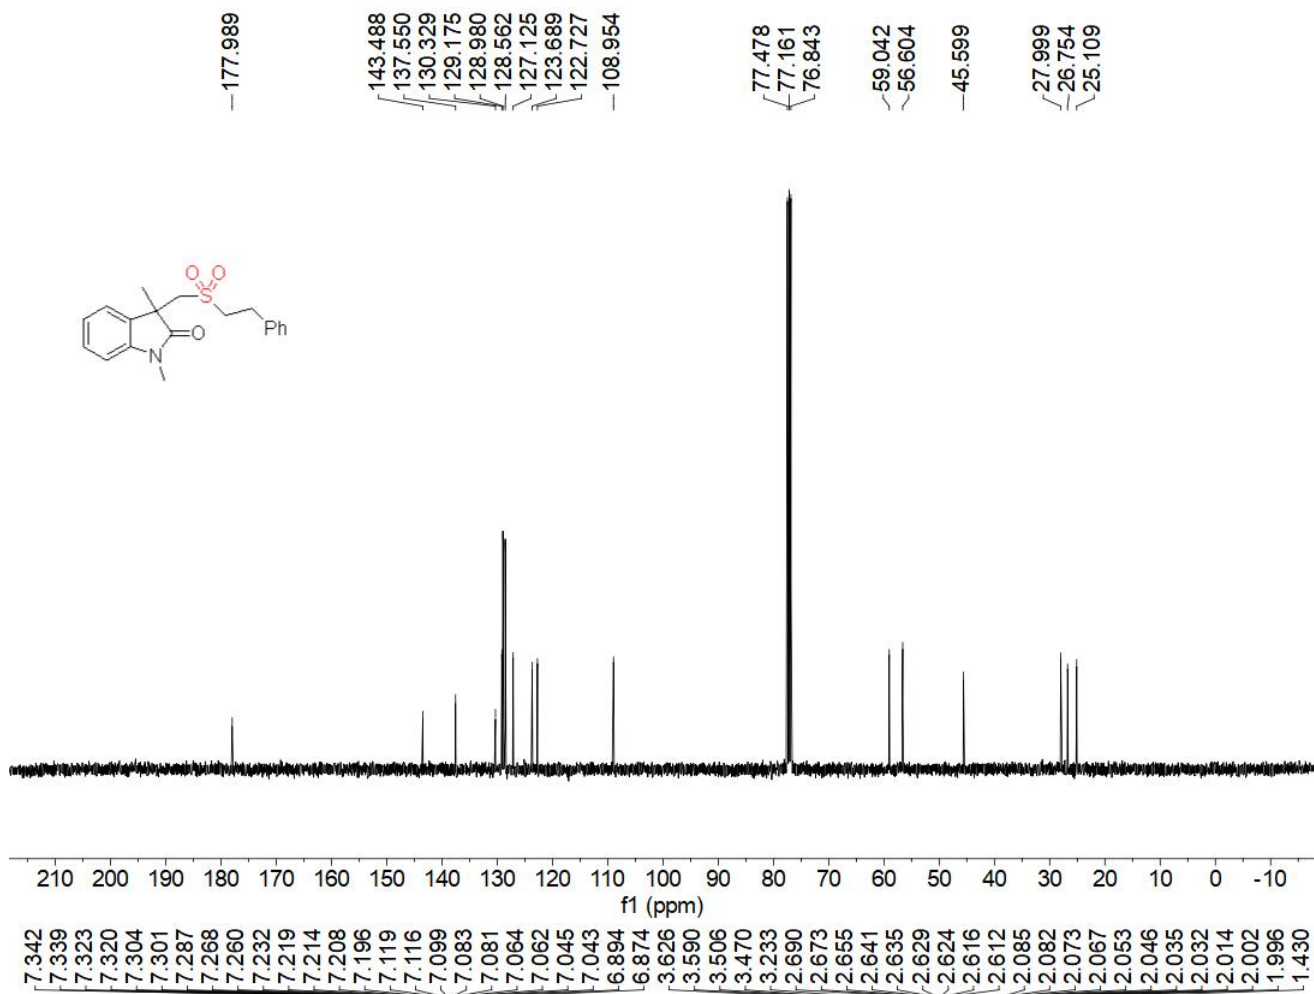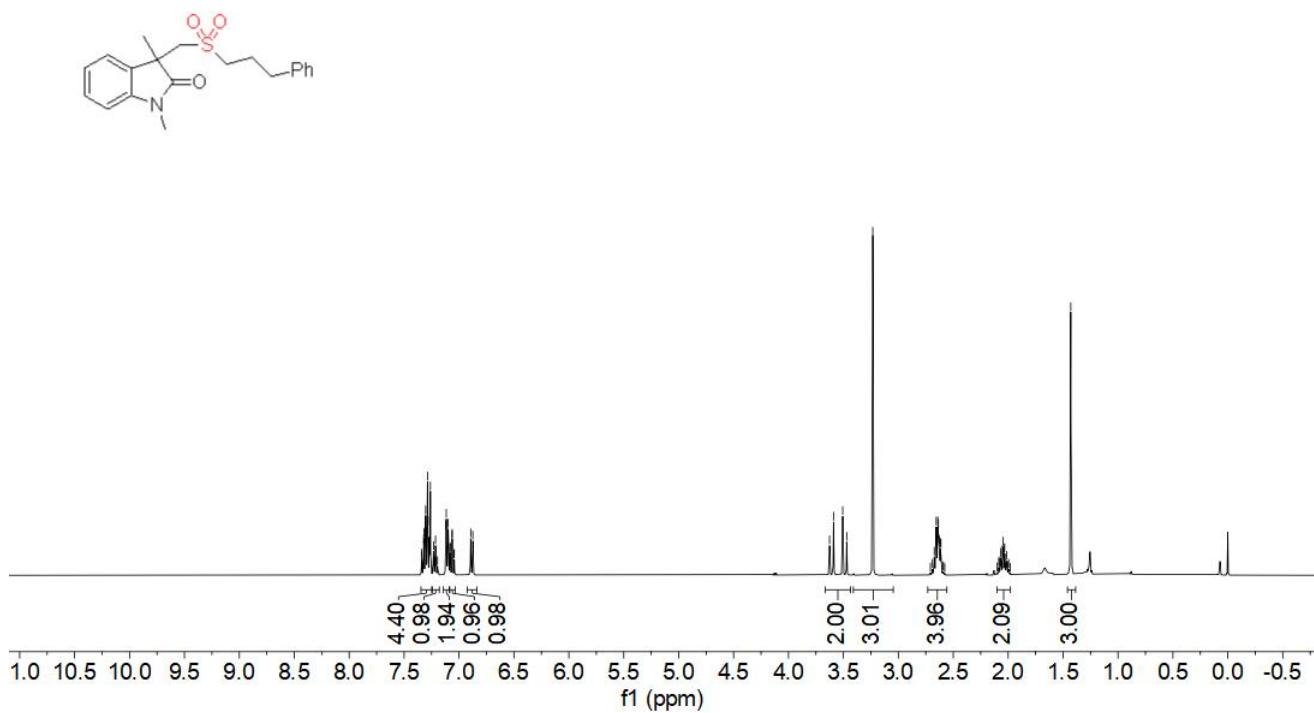

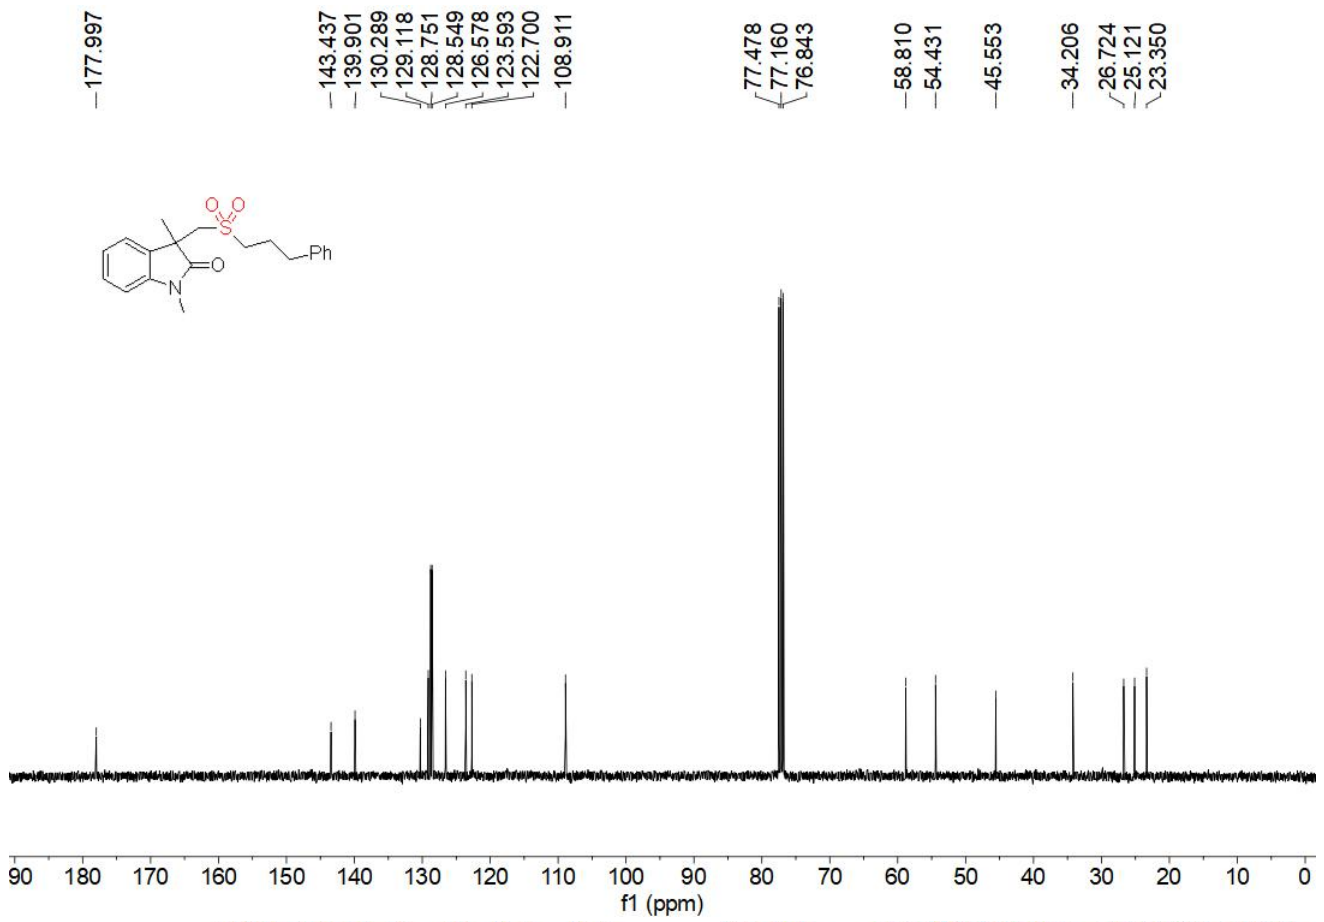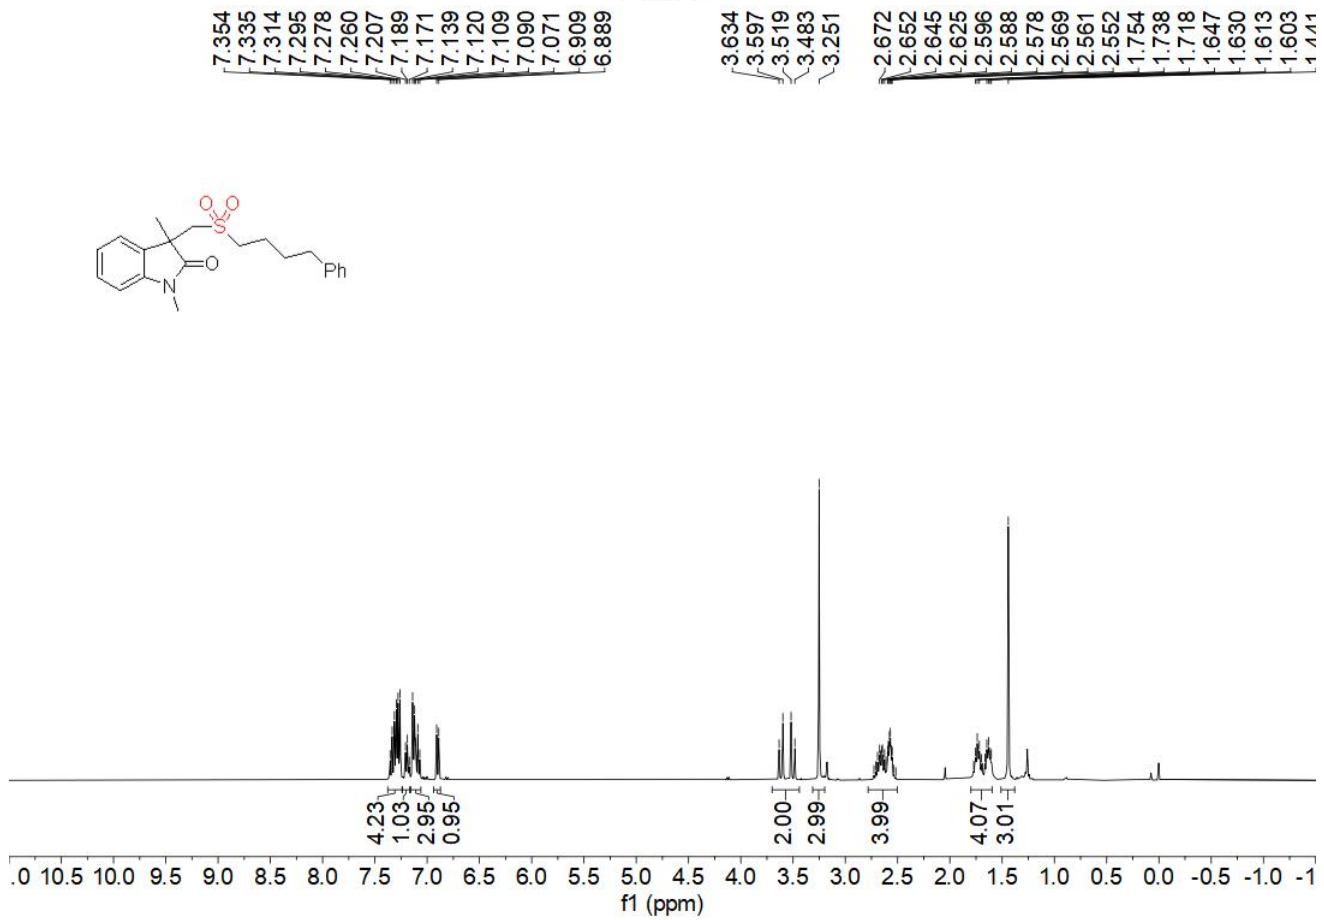



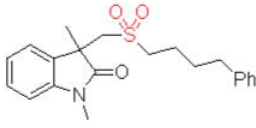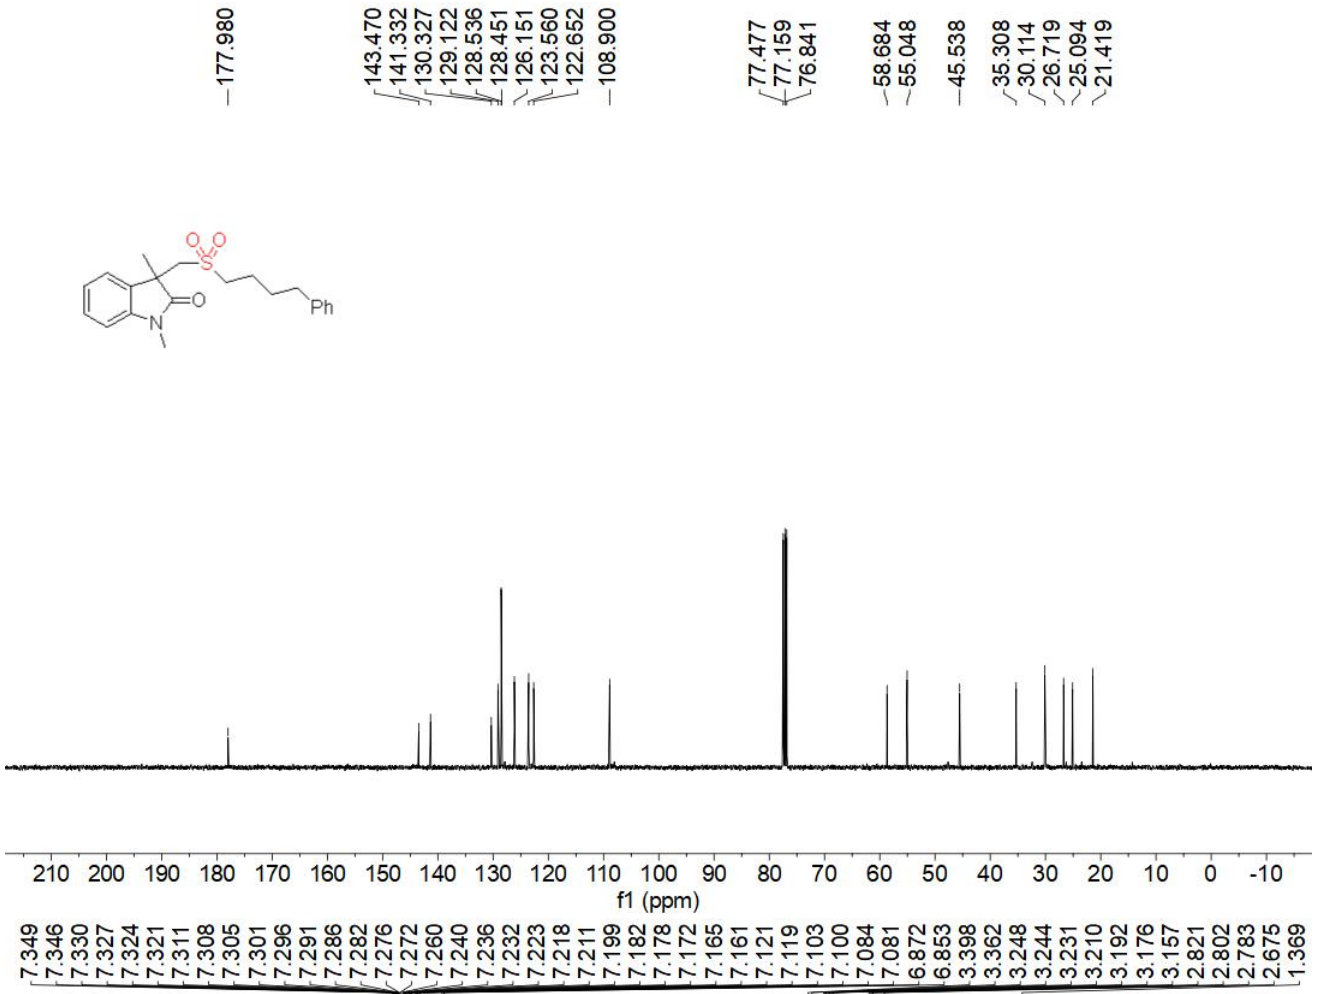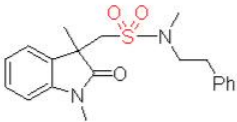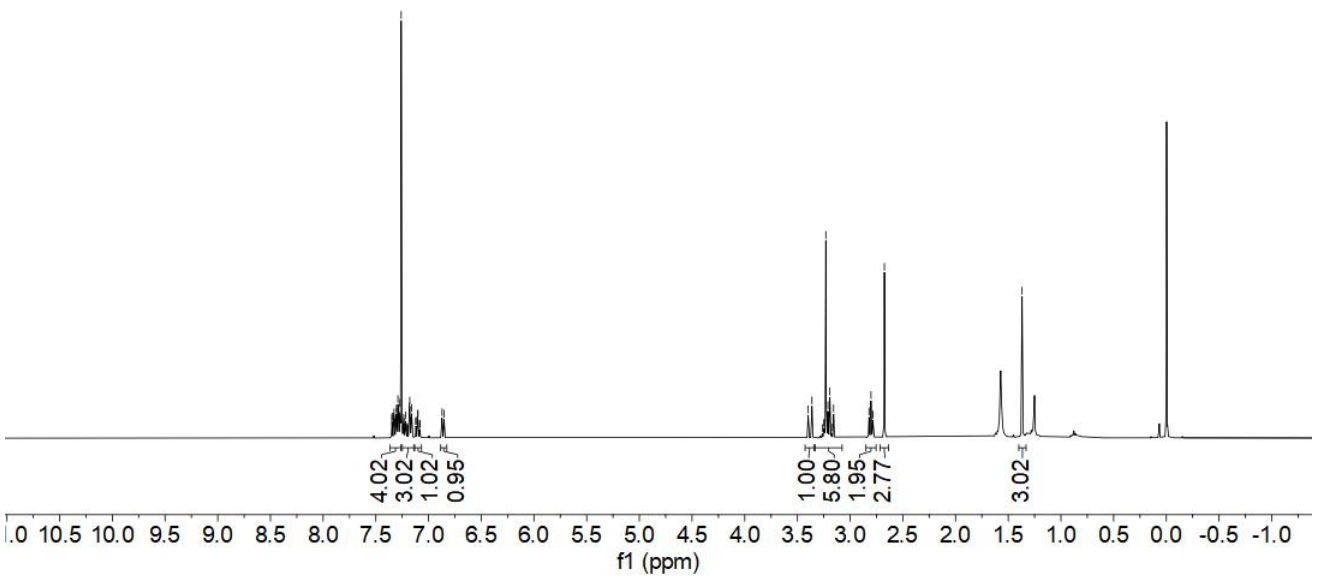

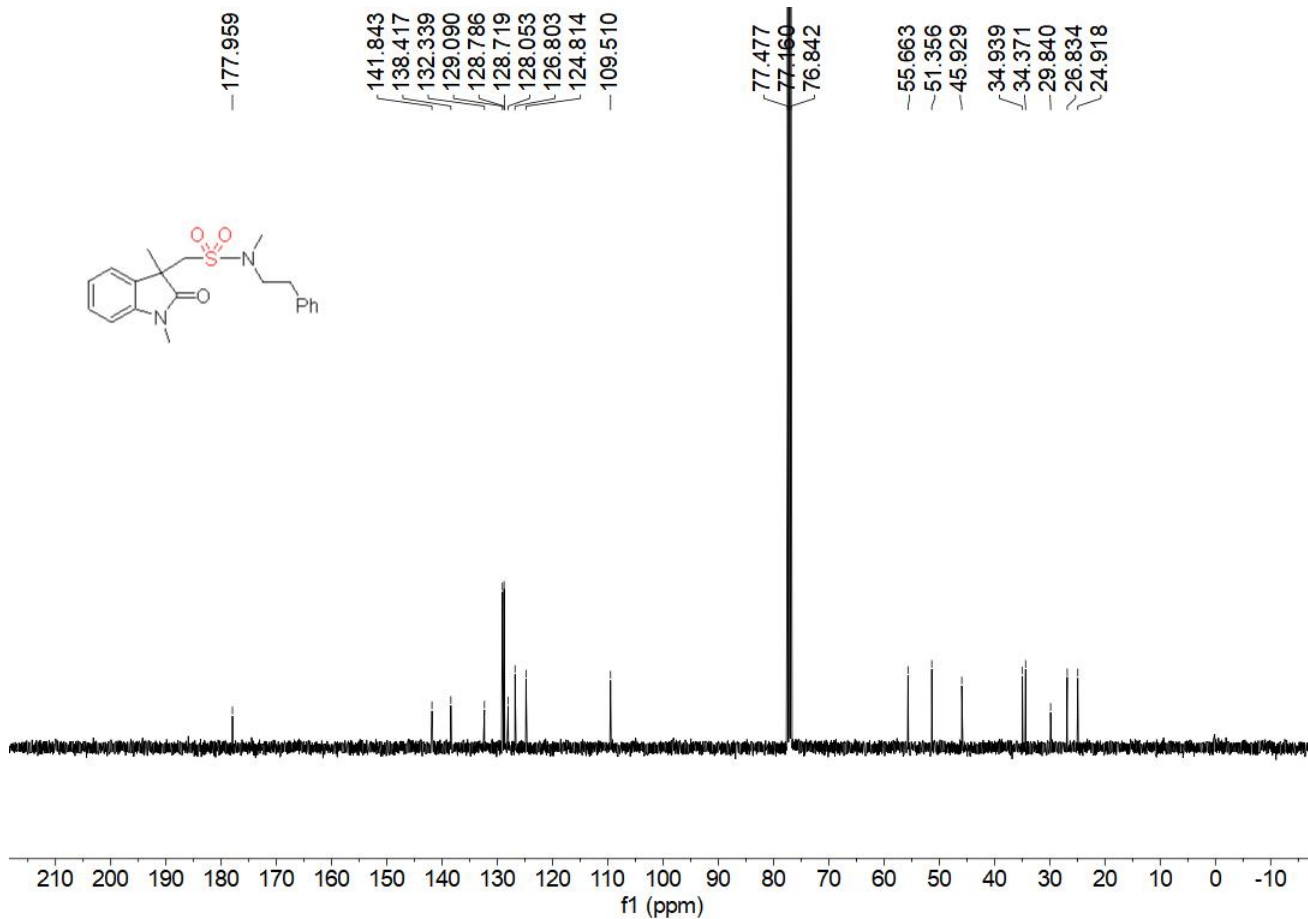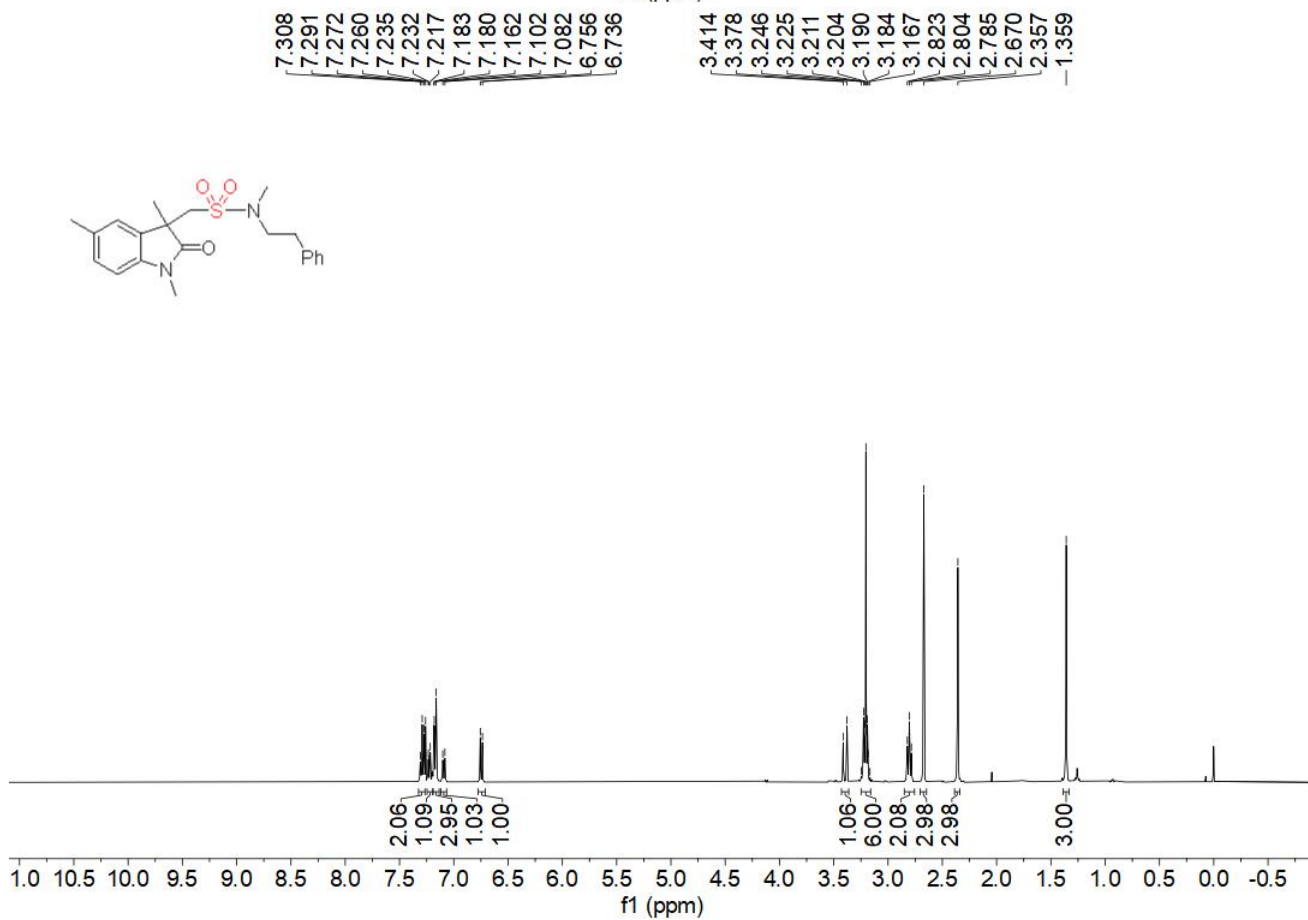

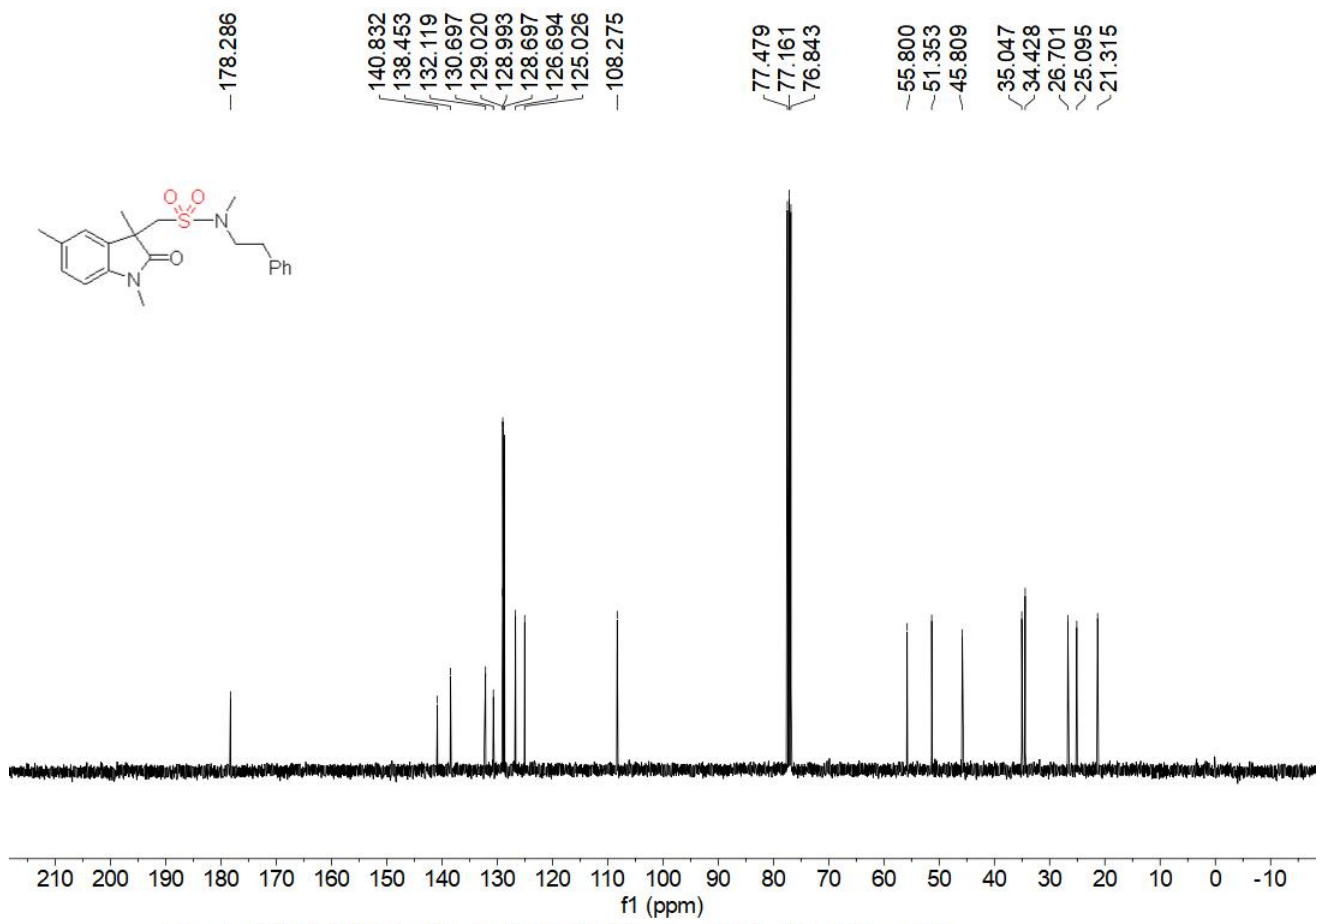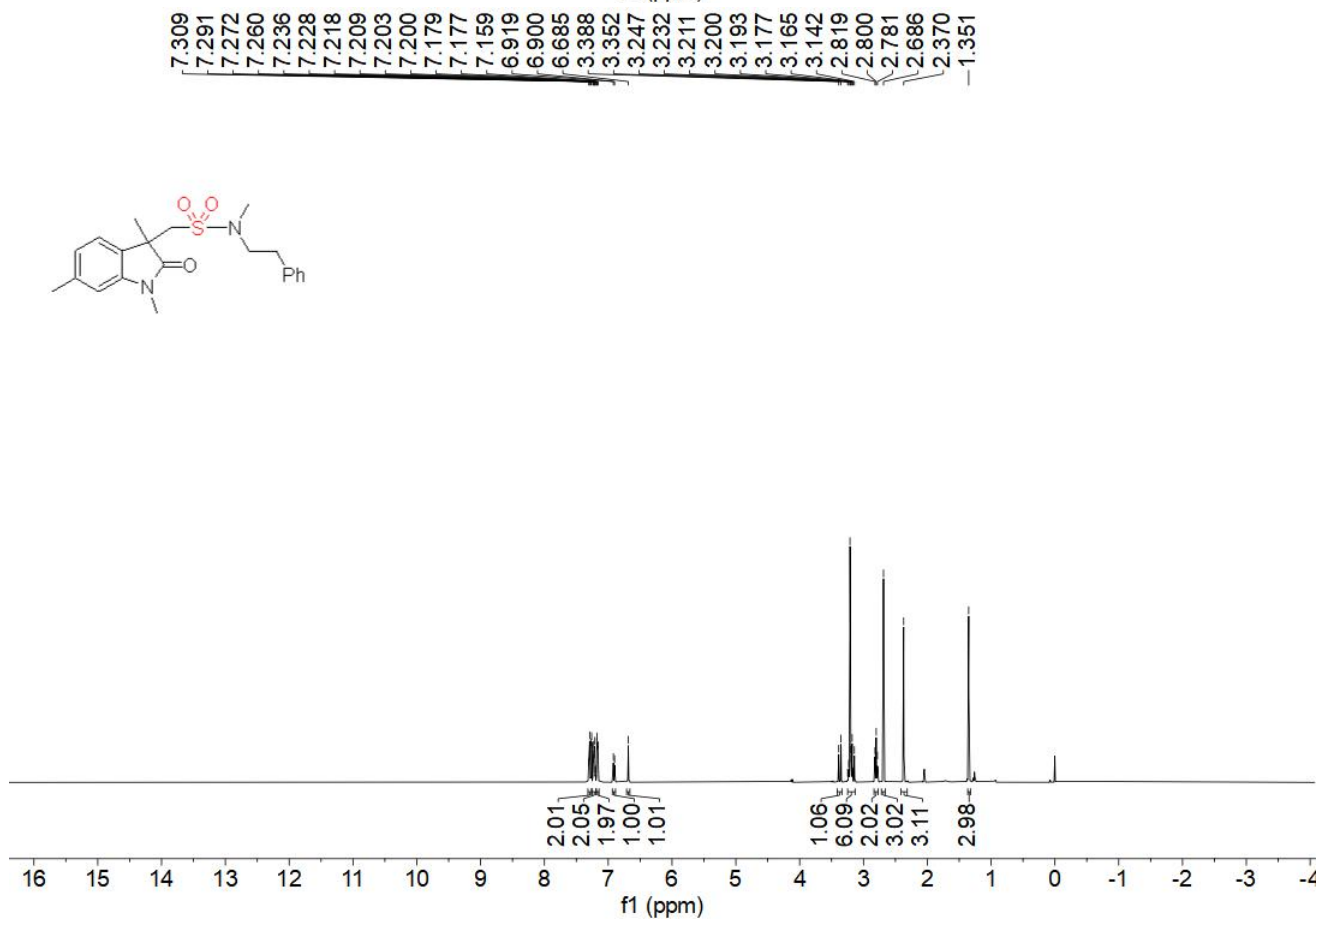

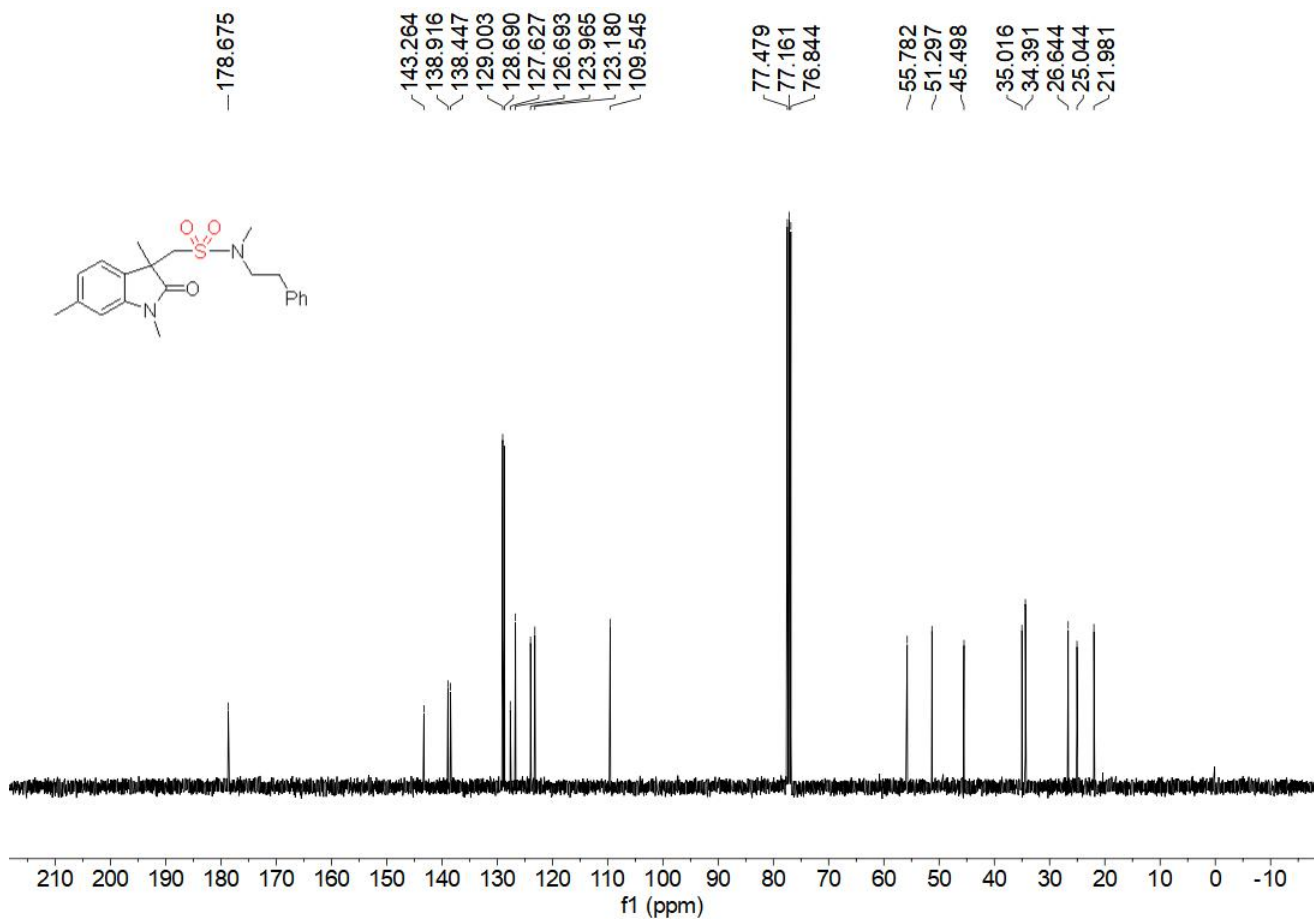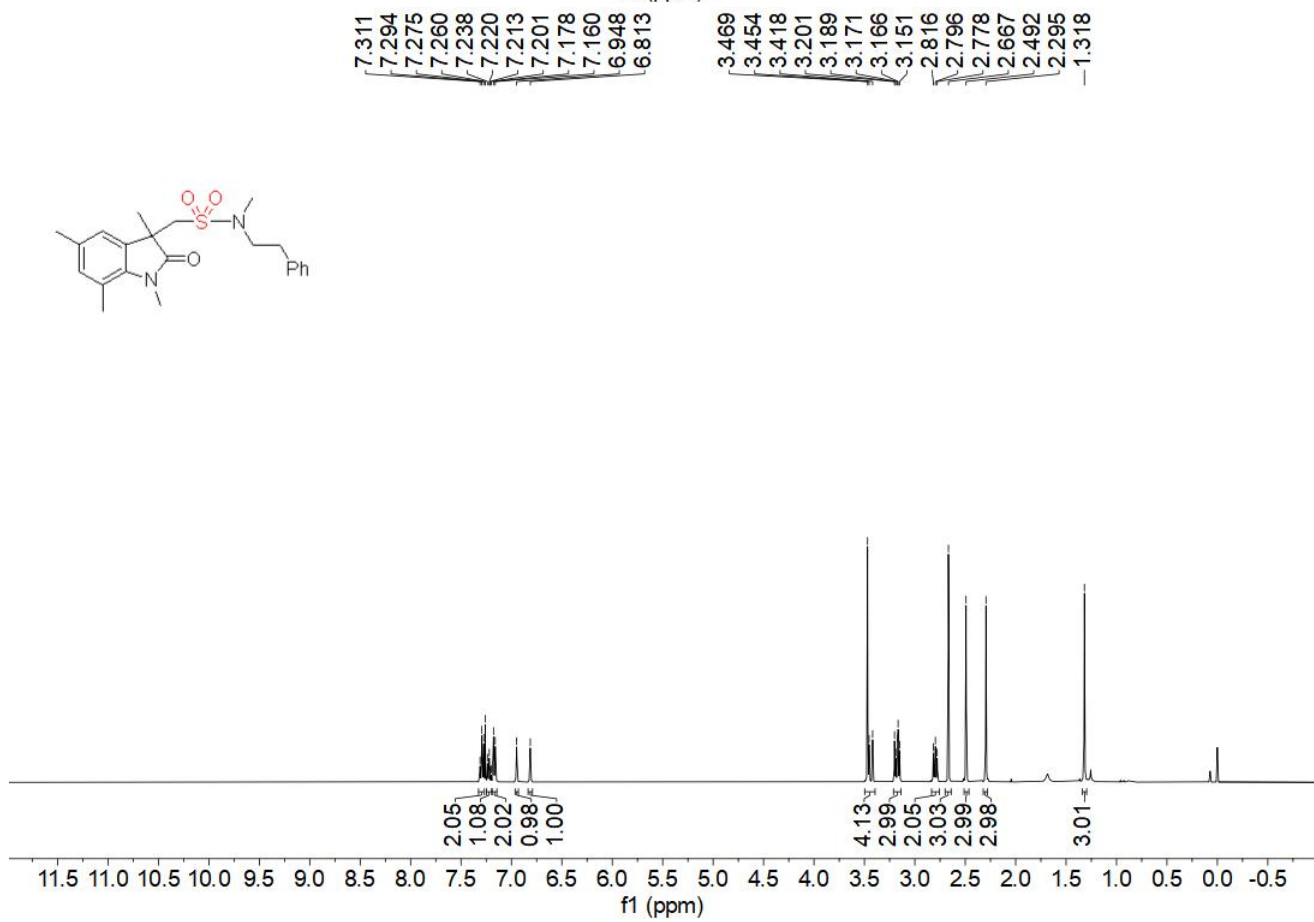

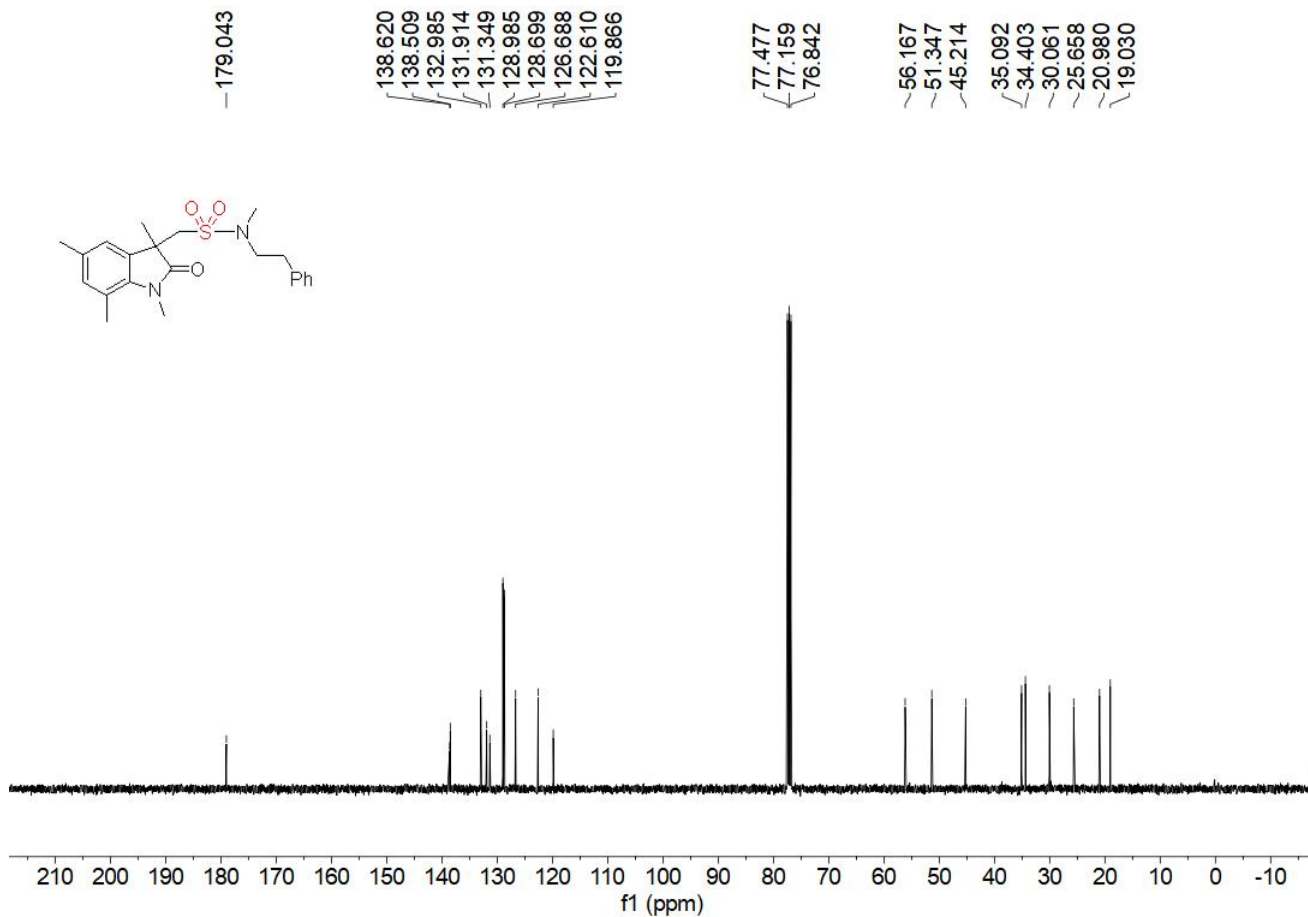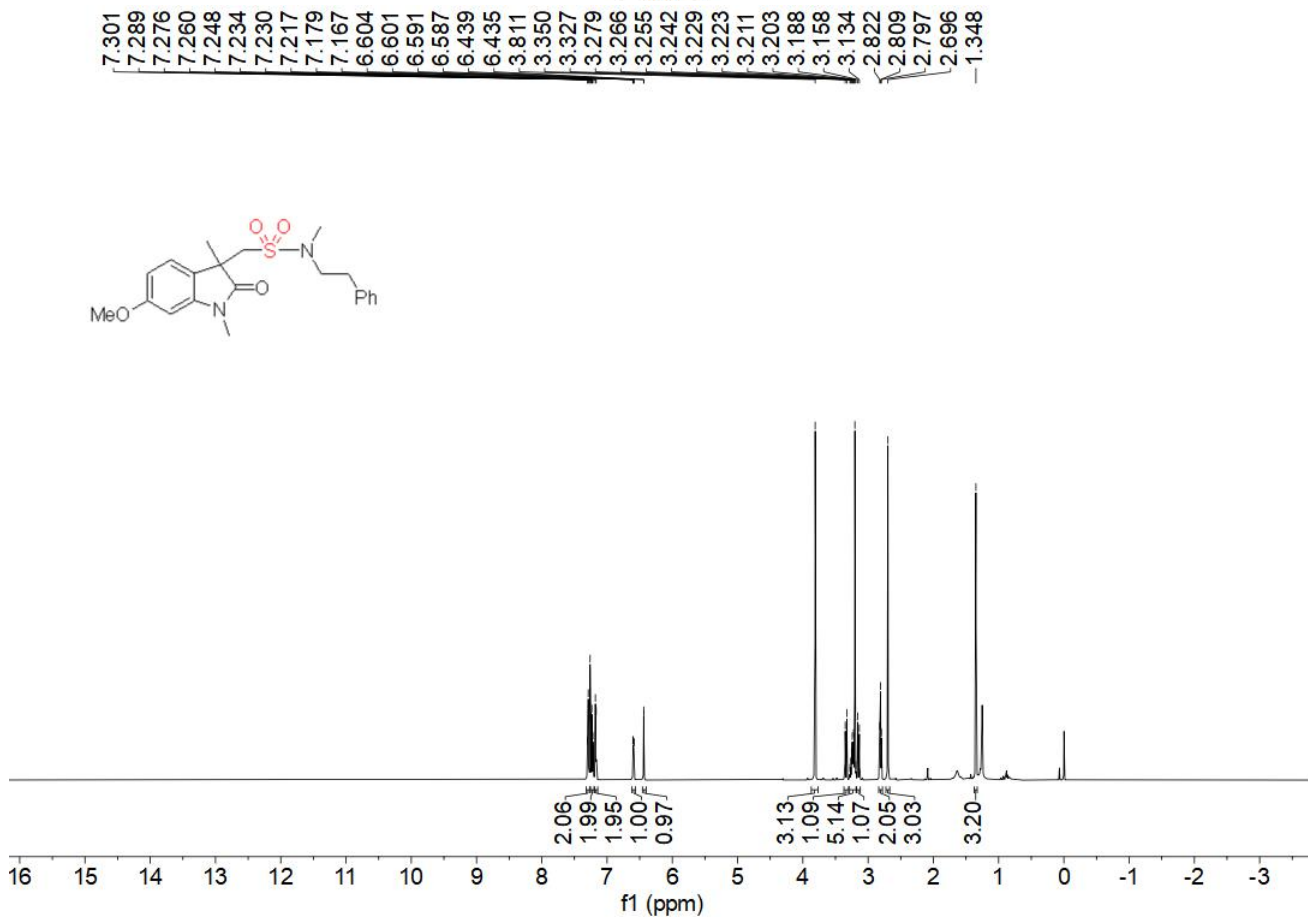

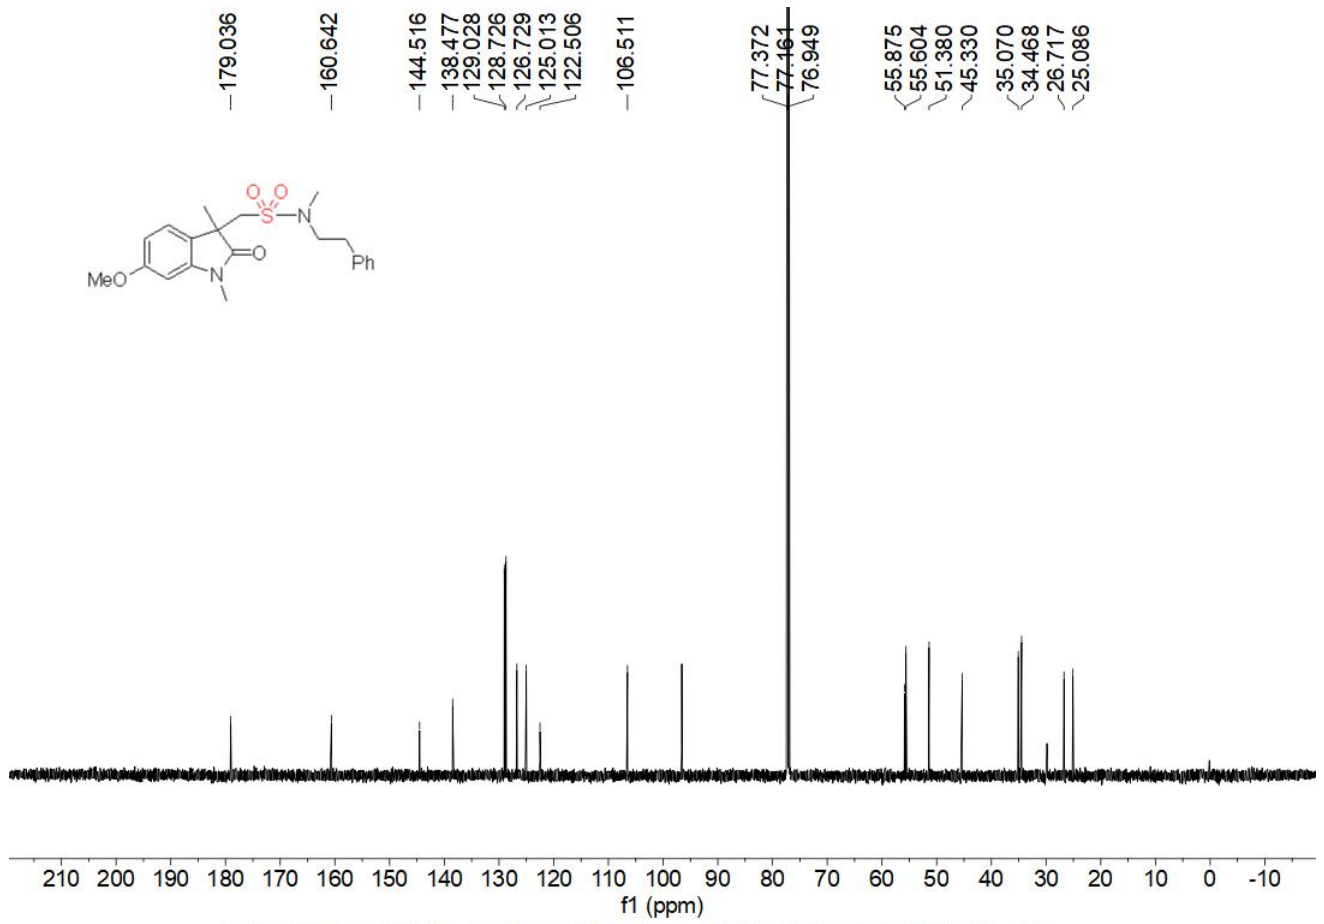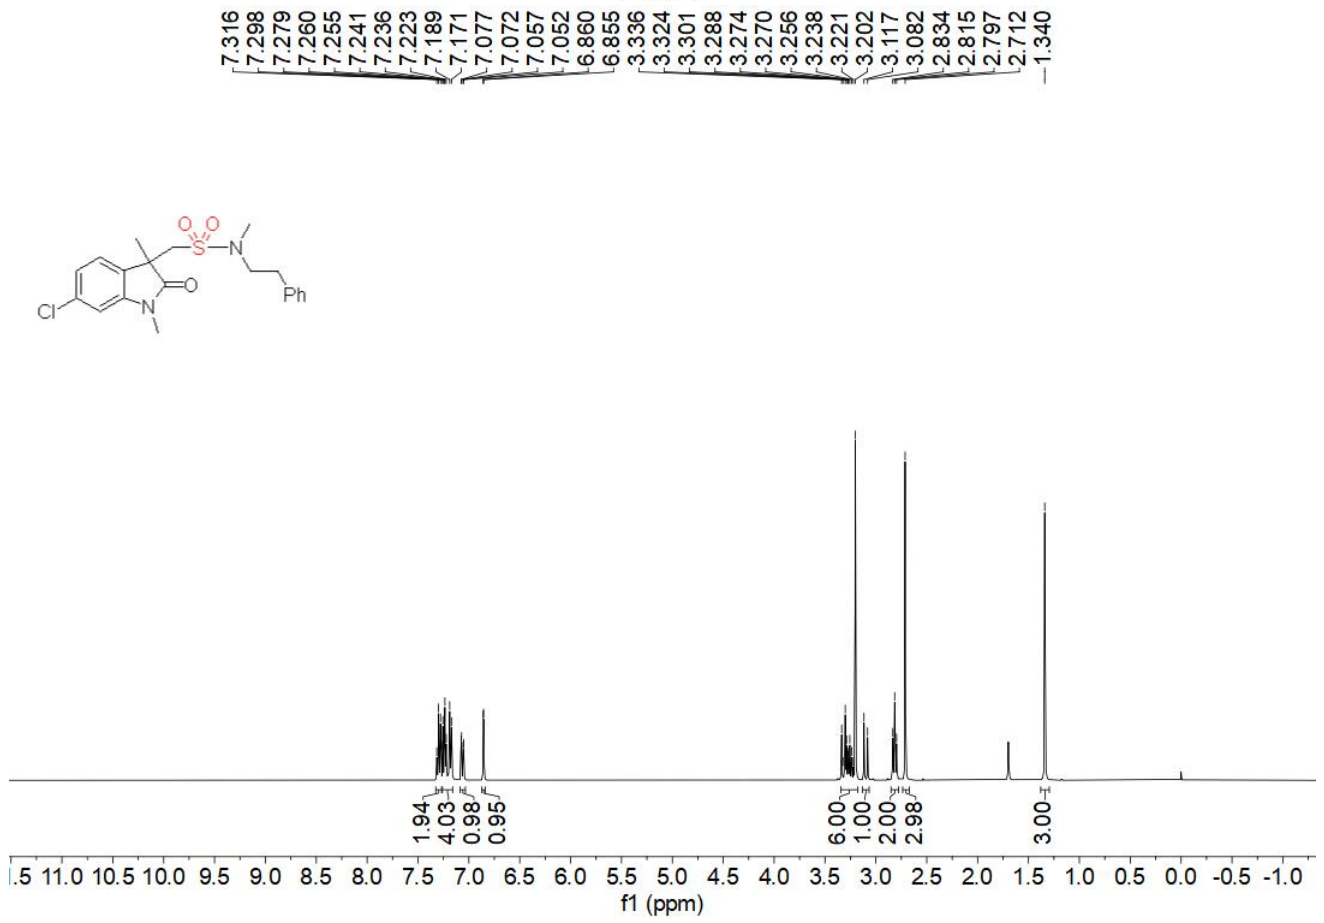



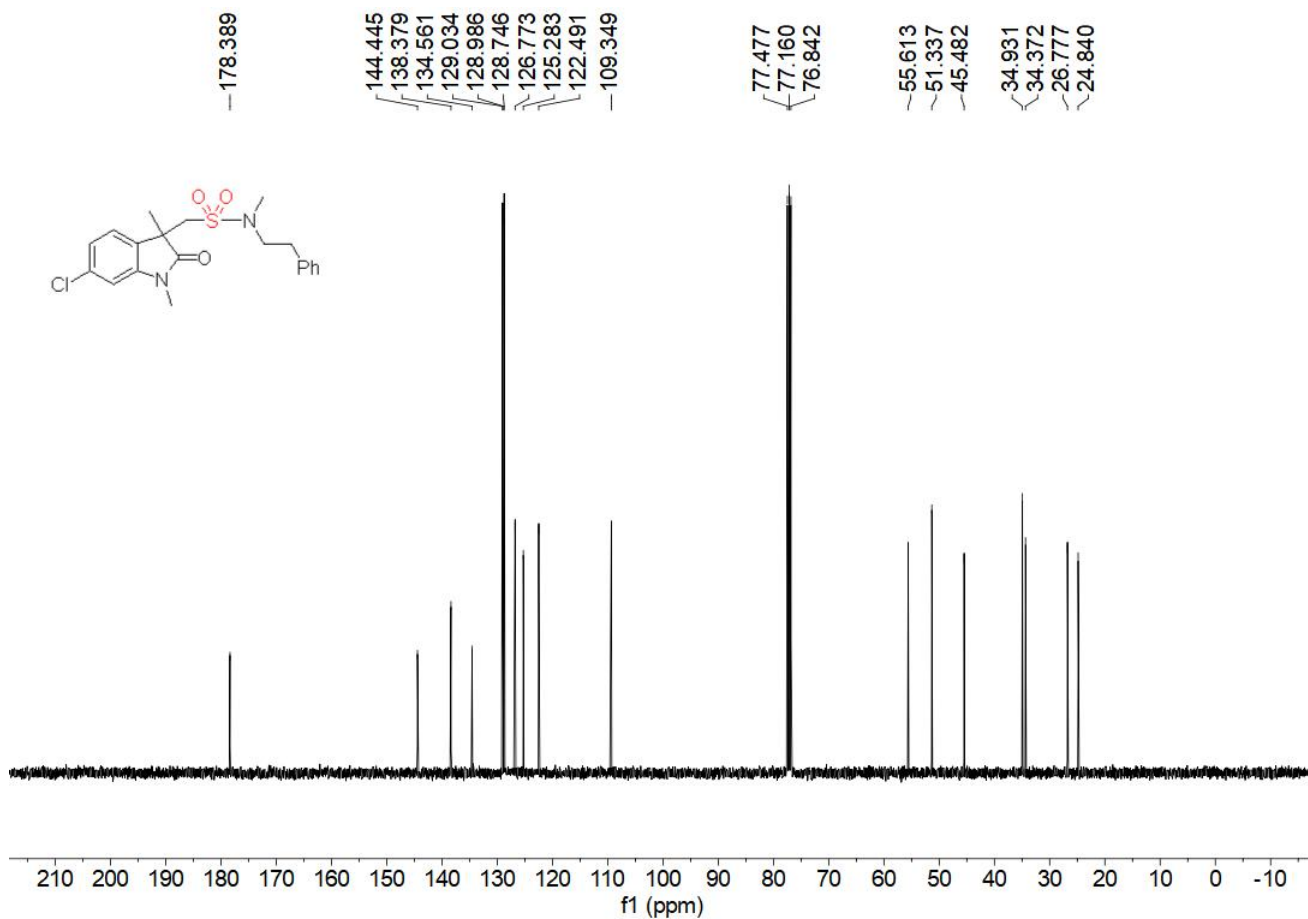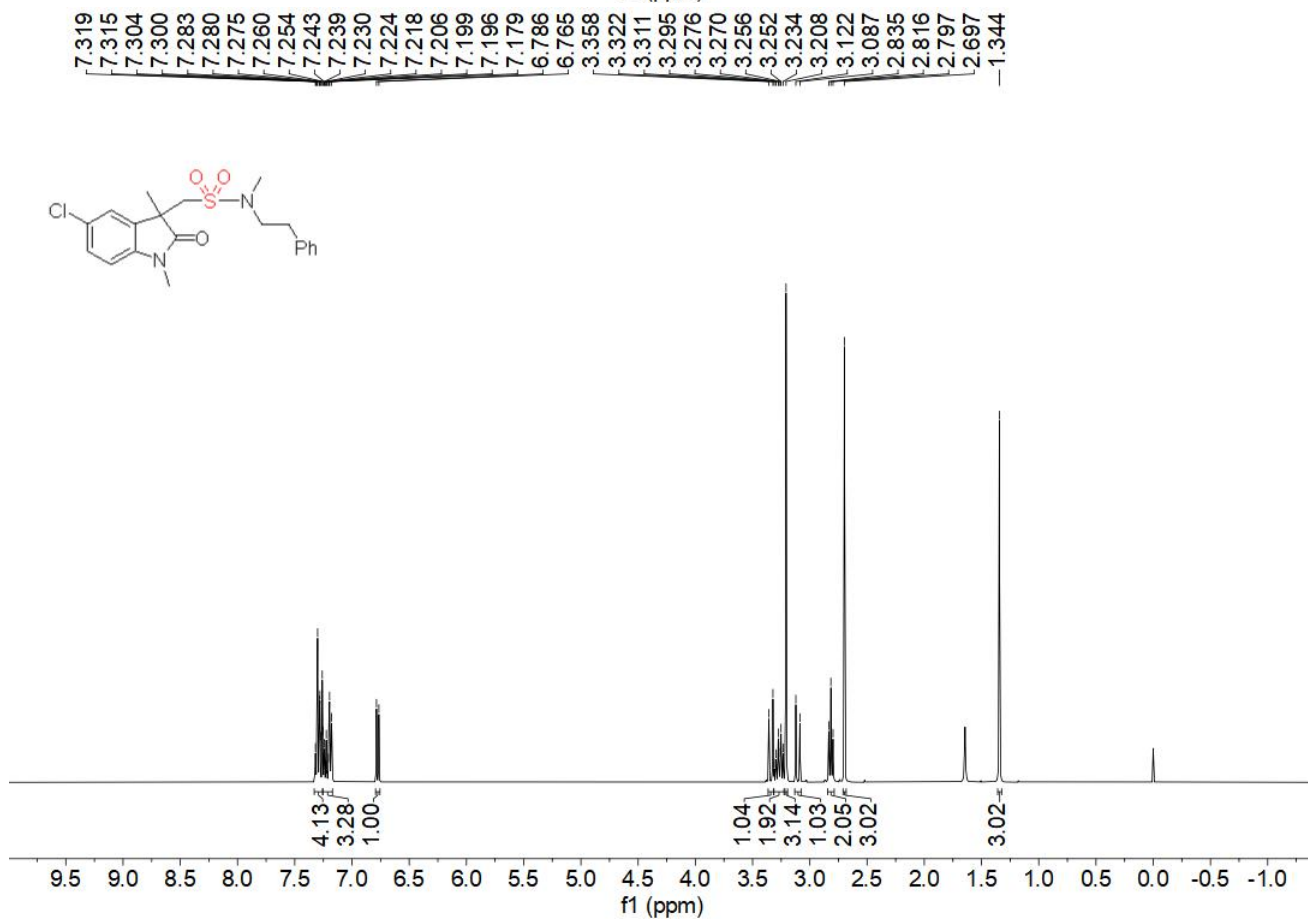

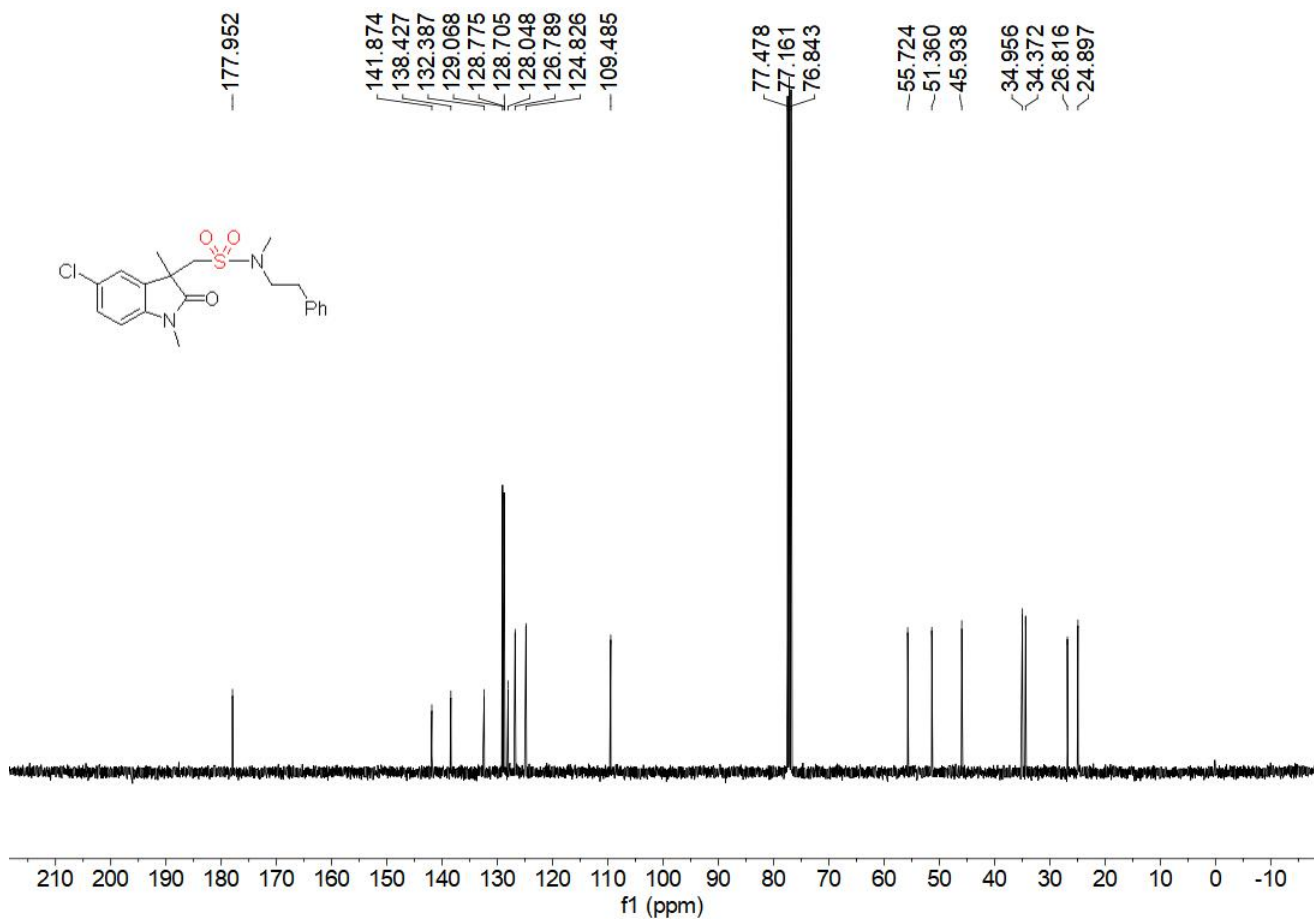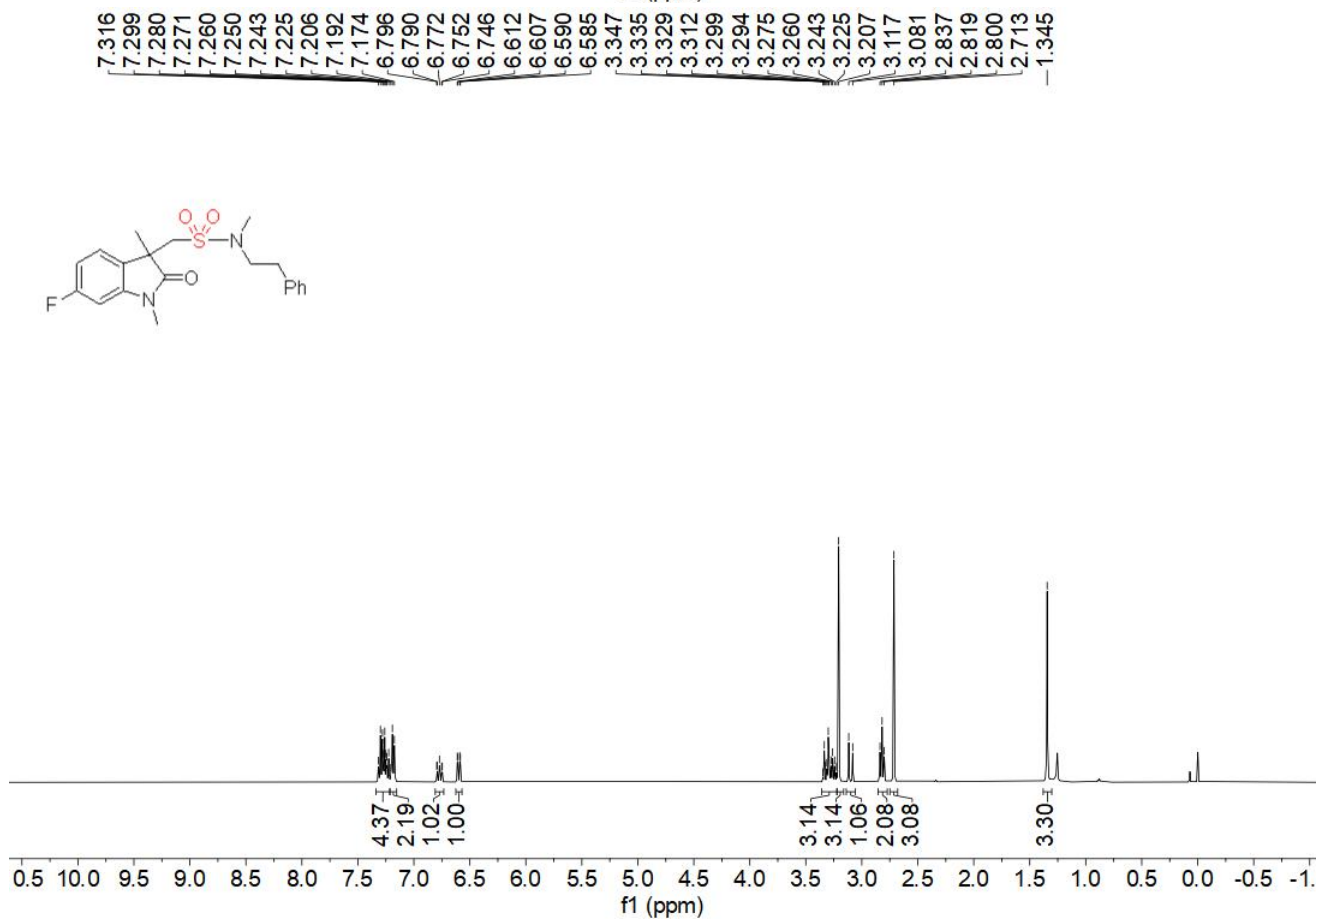



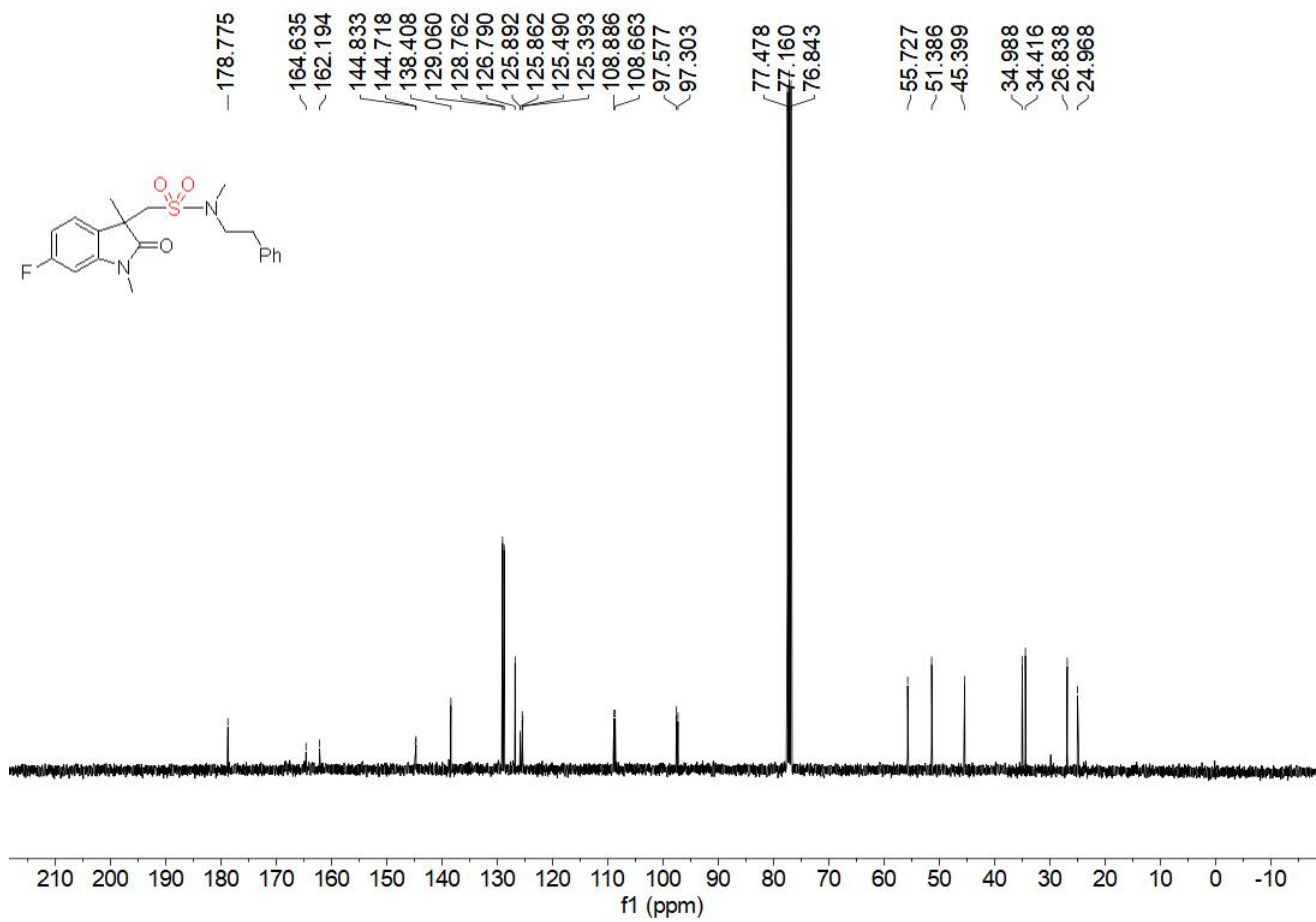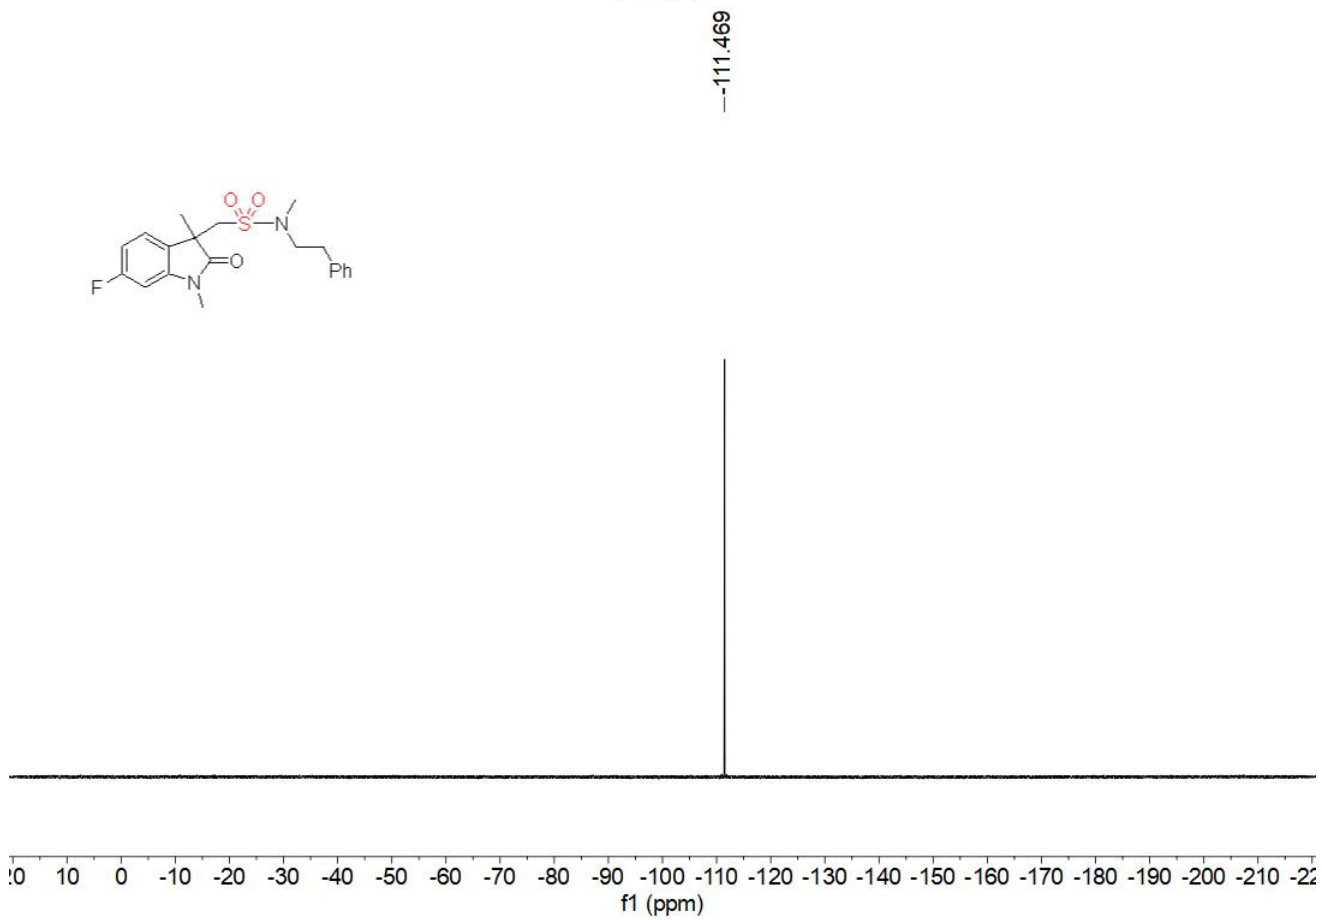

7.318  
7.300  
7.281  
7.260  
7.243  
7.225  
7.197  
7.178  
7.114  
7.108  
7.084  
7.088  
7.027  
7.021  
7.005  
6.999  
6.982  
6.977  
6.791  
6.781  
6.770  
6.759  
3.353  
3.332  
3.317  
3.297  
3.280  
3.263  
3.245  
3.228  
3.214  
3.098  
3.063  
2.838  
2.820  
2.801  
2.720  
1.353

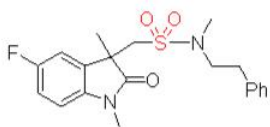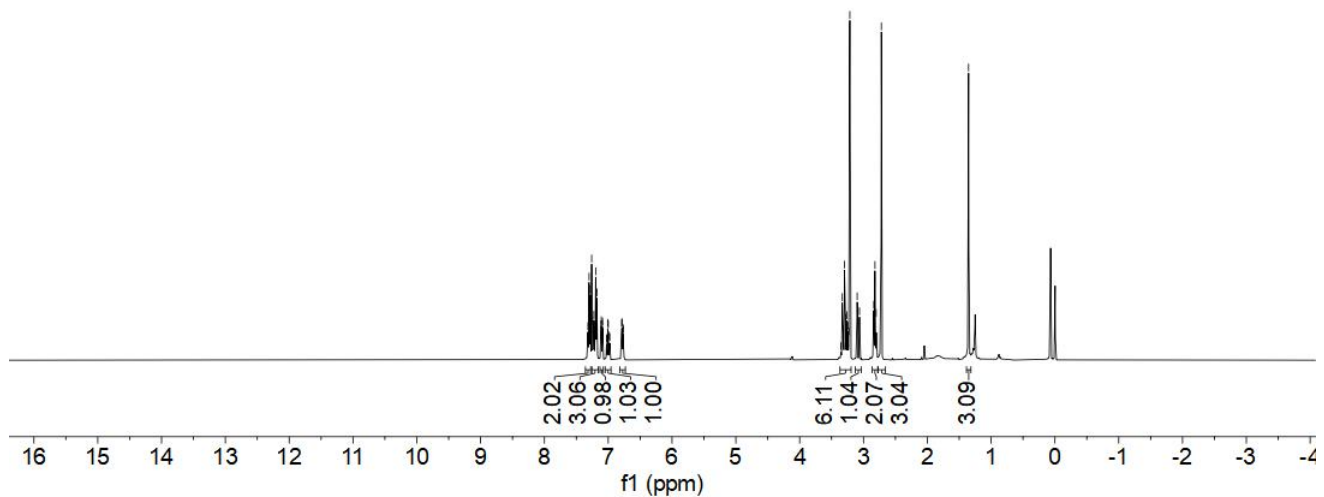

16 15 14 13 12 11 10 9 8 7 6 5 4 3 2 1 0 -1 -2 -3 -4

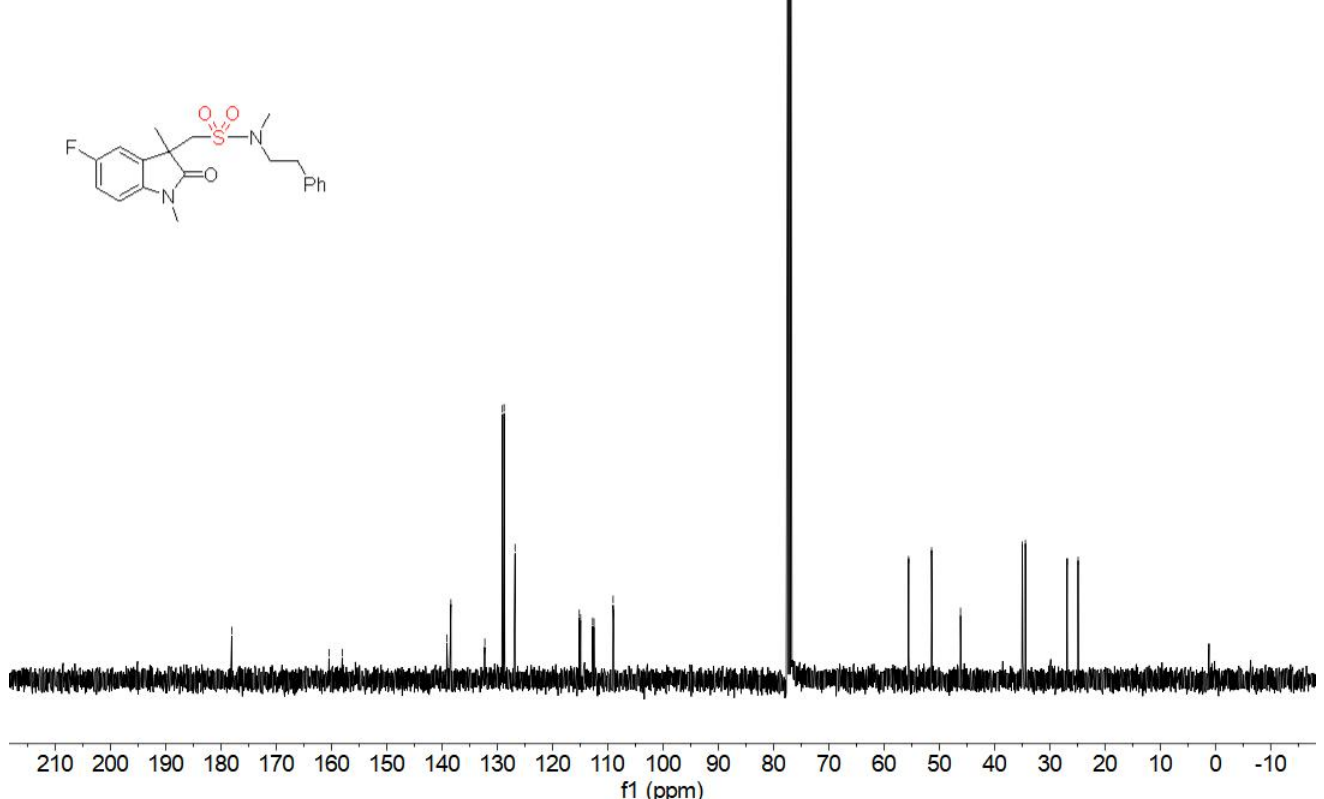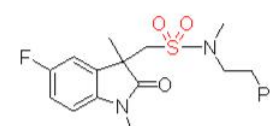

210 200 190 180 170 160 150 140 130 120 110 100 90 80 70 60 50 40 30 20 10 0 -10

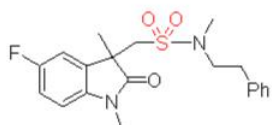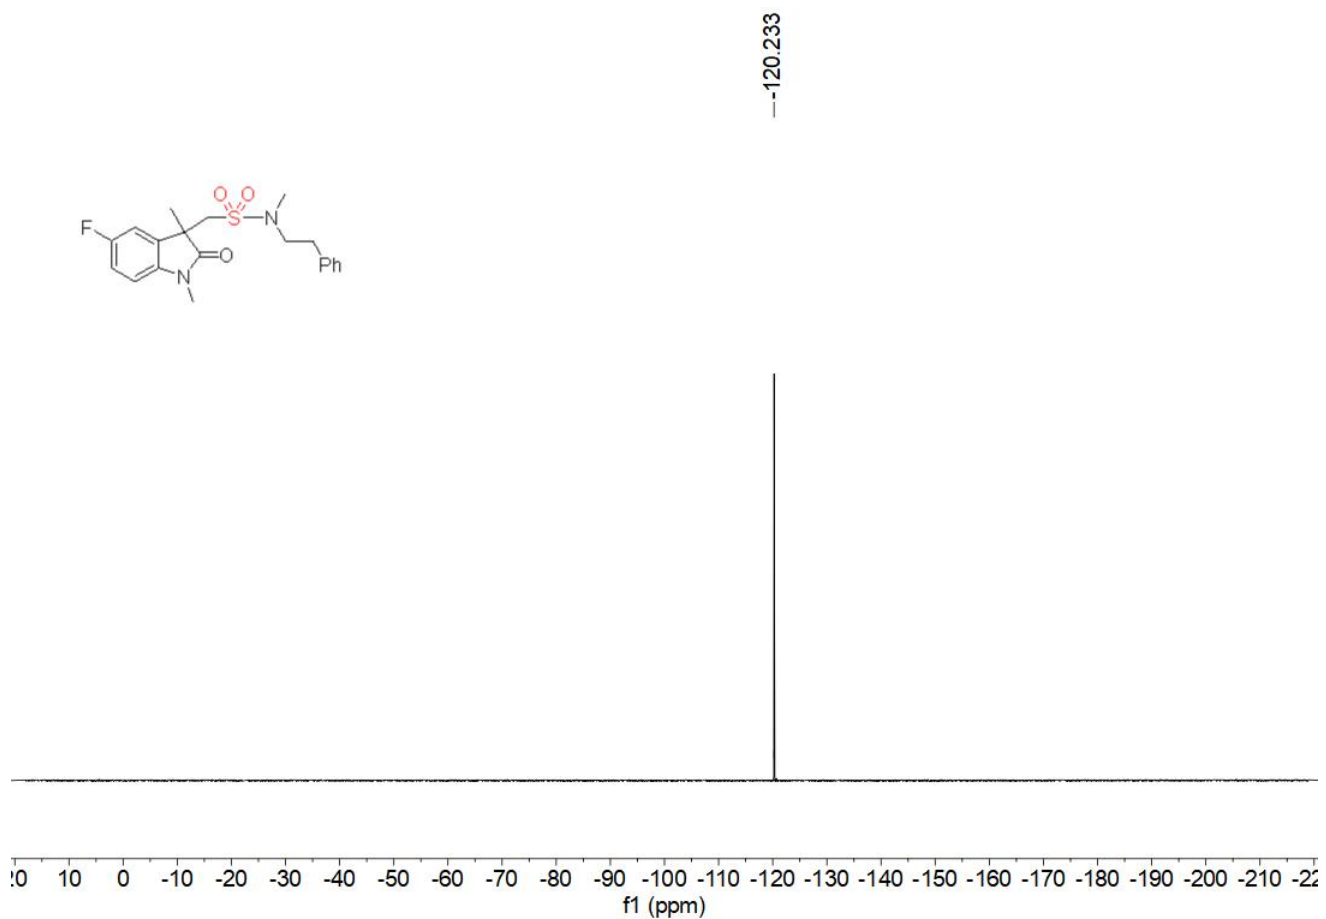

7.590  
7.570  
7.545  
7.319  
7.301  
7.282  
7.260  
7.245  
7.227  
7.221  
7.209  
7.188  
7.171  
6.936  
6.916  
3.386  
3.351  
3.307  
3.288  
3.272  
3.257  
3.230  
3.212  
3.194  
3.176  
3.152  
3.116  
2.822  
2.804  
2.785  
2.673  
1.364

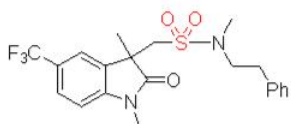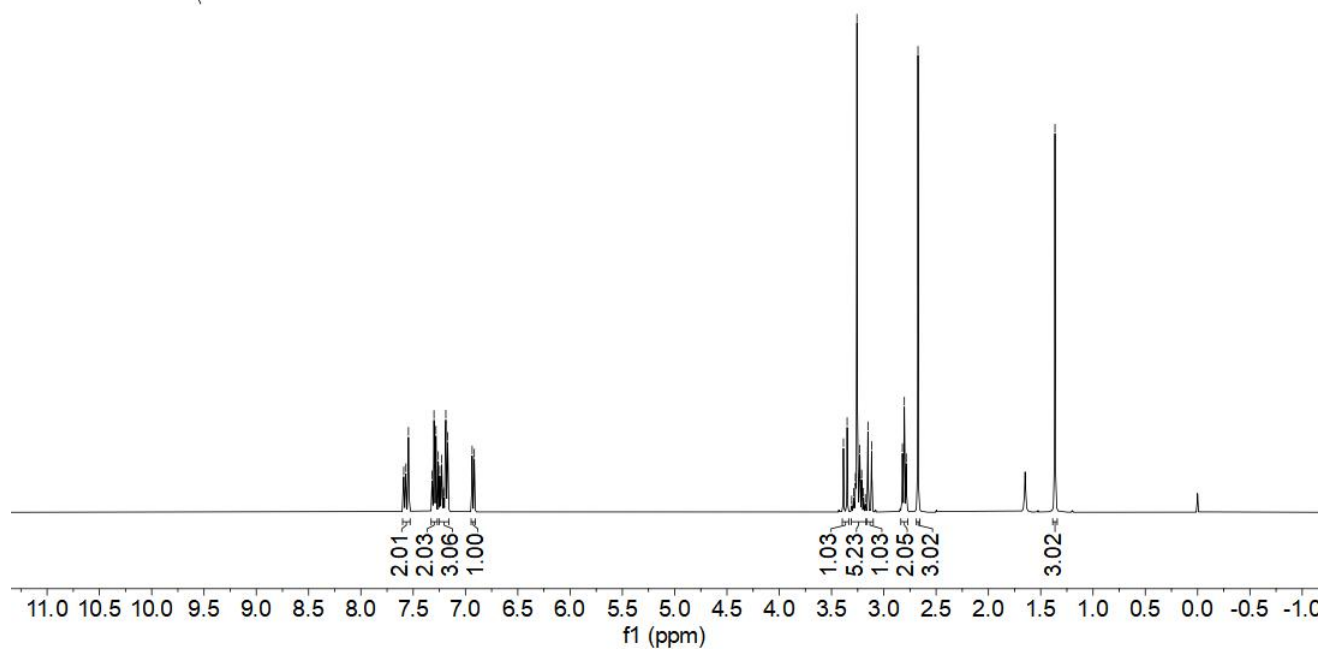

2.01  
2.03  
3.06  
1.00  
1.03  
5.23  
1.03  
2.05  
3.02  
3.02  
3.02

178.411  
146.348  
138.412  
131.276  
129.066  
128.777  
128.562  
126.804  
126.577  
126.538  
126.497  
126.460  
125.863  
125.320  
124.995  
124.670  
124.347  
123.167  
121.455  
121.419  
121.382  
121.346  
120.466  
108.351

77.479  
77.161  
76.843

55.813  
51.308  
45.679

34.908  
34.284  
26.901  
24.867

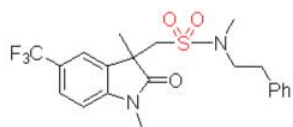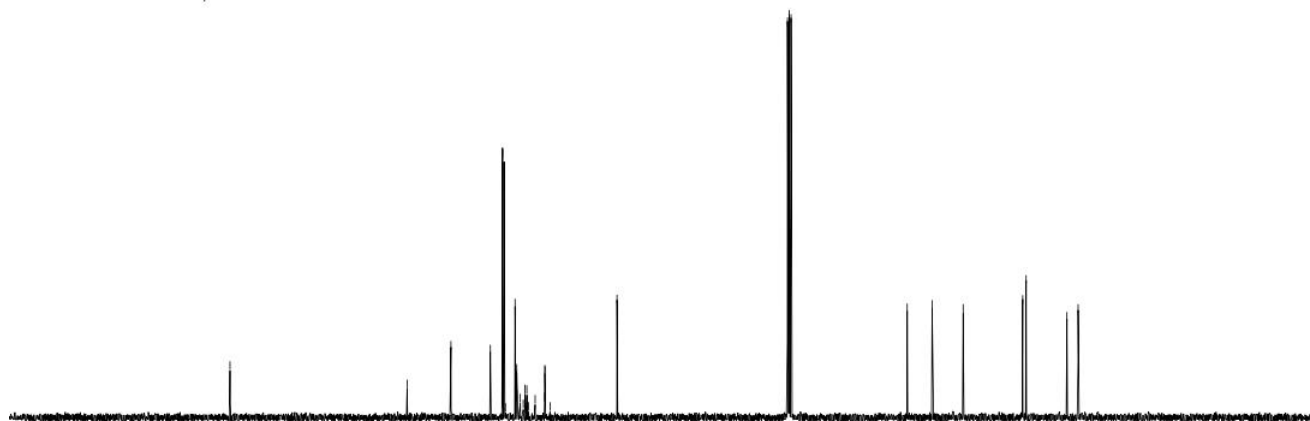

210 200 190 180 170 160 150 140 130 120 110 100 90 80 70 60 50 40 30 20 10 0 -10

f1 (ppm)

61.301

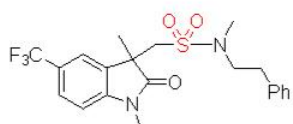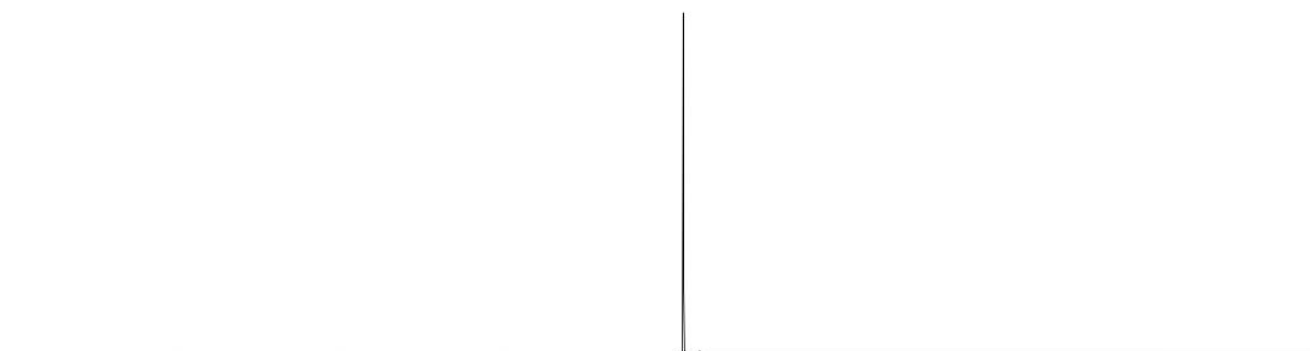

-42 -44 -46 -48 -50 -52 -54 -56 -58 -60 -62 -64 -66 -68 -70 -72 -74 -76 -78 -80

f1 (ppm)

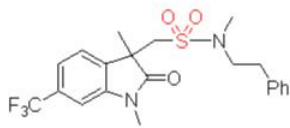

7.445  
7.426  
7.381  
7.361  
7.318  
7.300  
7.281  
7.260  
7.245  
7.227  
7.221  
7.209  
7.189  
7.172  
7.065

3.362  
3.339  
3.326  
3.304  
3.284  
3.261  
3.247  
3.230  
3.212  
3.136  
3.101  
2.836  
2.818  
2.799  
2.727  
1.367

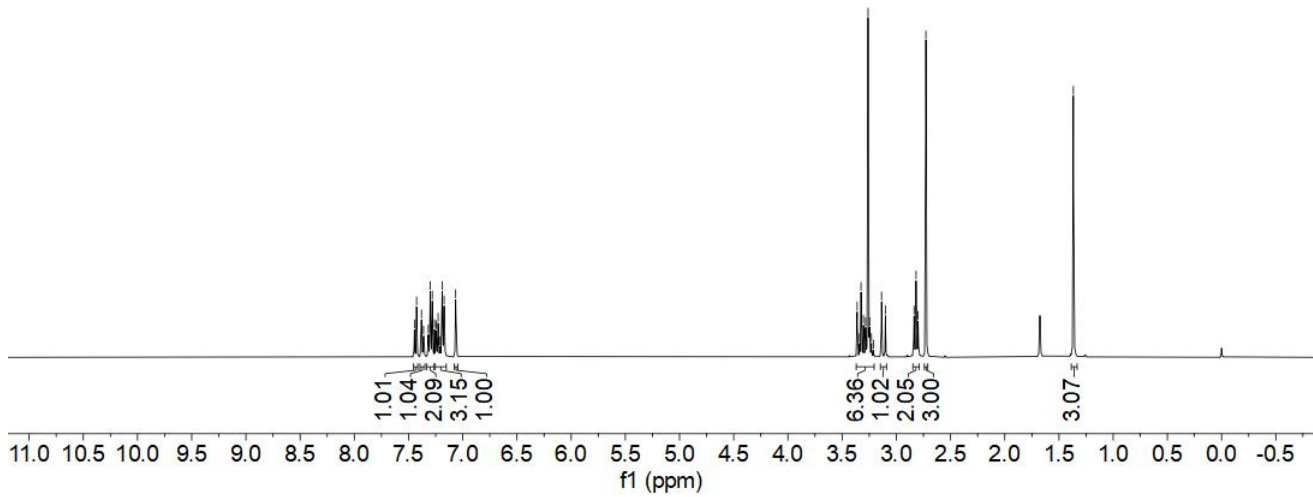

178.158  
143.874  
138.358  
134.534  
131.645  
131.324  
131.000  
130.678  
129.051  
128.772  
128.122  
126.819  
125.418  
124.647  
122.710  
120.003  
119.750  
119.709  
119.670  
119.629  
105.404  
105.367  
105.330  
105.292

77.479  
77.161  
76.843

55.529  
51.362  
45.780

34.912  
34.357  
26.838  
24.802

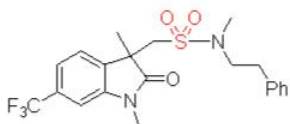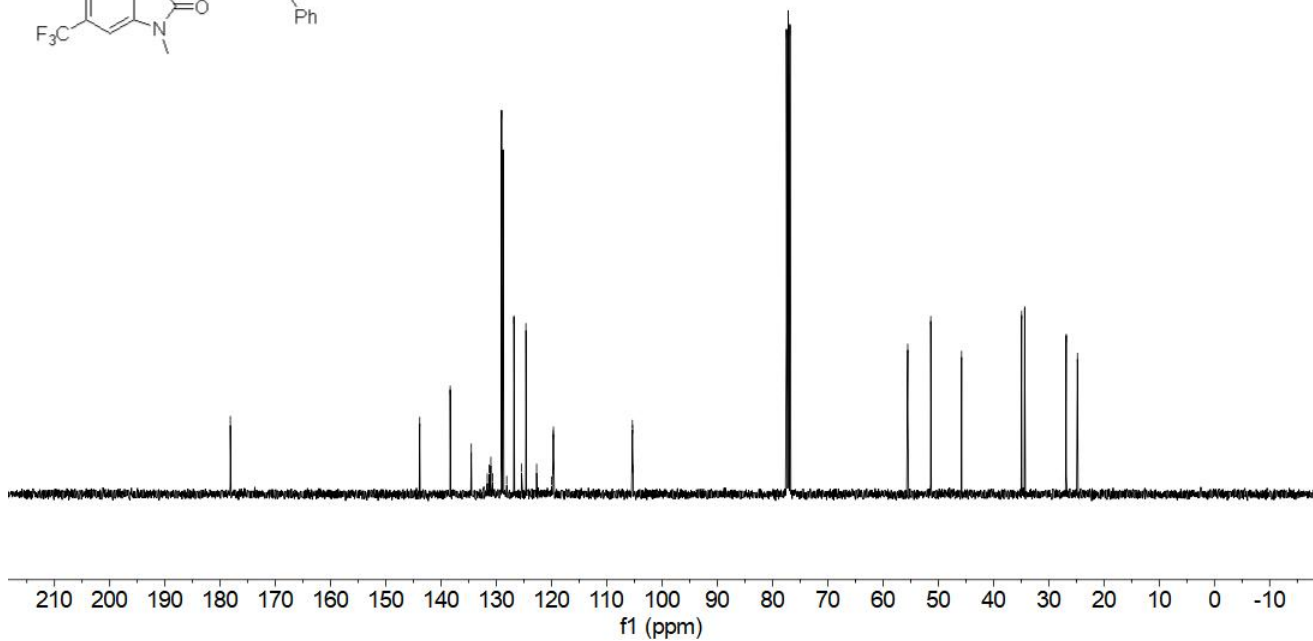

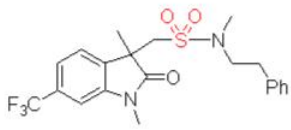

--62.400

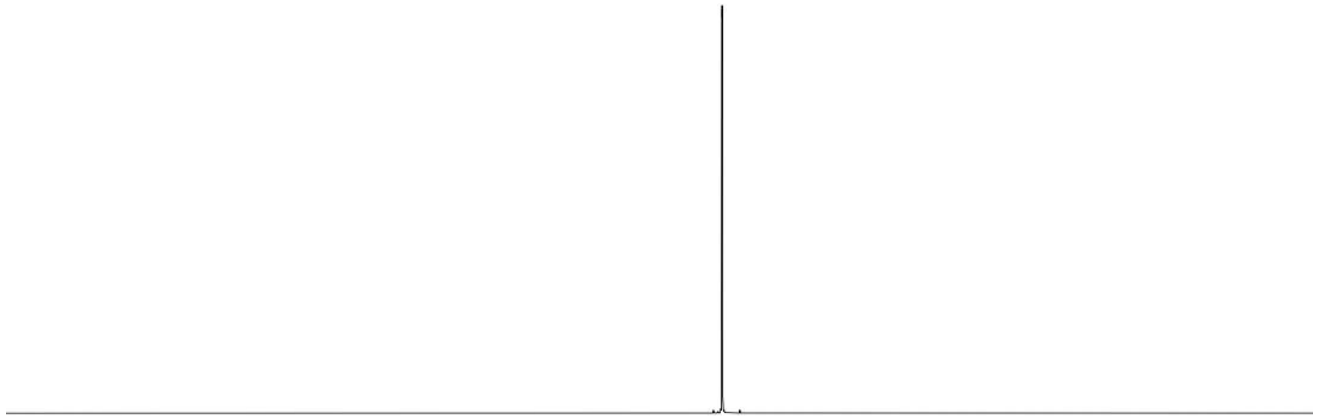

-44 -46 -48 -50 -52 -54 -56 -58 -60 -62 -64 -66 -68 -70 -72 -74 -76 -78  
f1 (ppm)

8.214  
8.207  
7.640  
7.629  
7.292  
7.279  
7.267  
7.260  
7.225  
7.213  
7.200  
7.181  
7.169  
7.005  
6.996  
6.993  
6.984  
6.984  
3.344  
3.331  
3.320  
3.307  
3.294  
3.281  
3.270  
3.258  
3.231  
3.207  
3.116  
3.093  
2.832  
2.820  
2.807  
2.739  
1.401

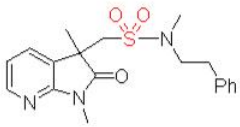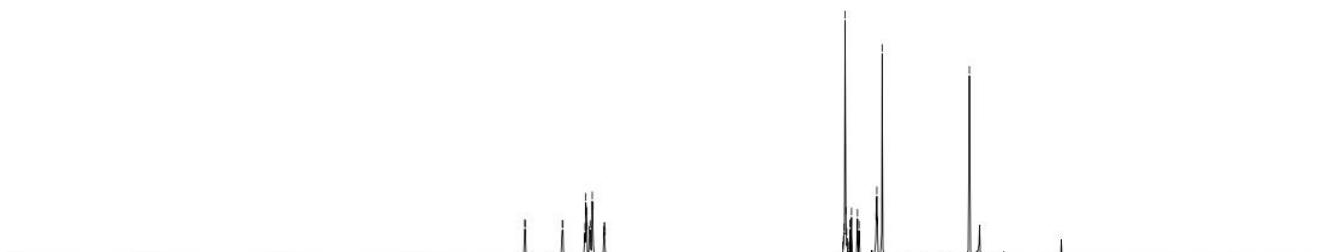

16 15 14 13 12 11 10 9 8 7 6 5 4 3 2 1 0 -1 -2 -3  
f1 (ppm)

0.97  
1.00  
2.02  
3.02  
1.02  
5.07  
1.03  
1.03  
2.09  
3.02  
3.07

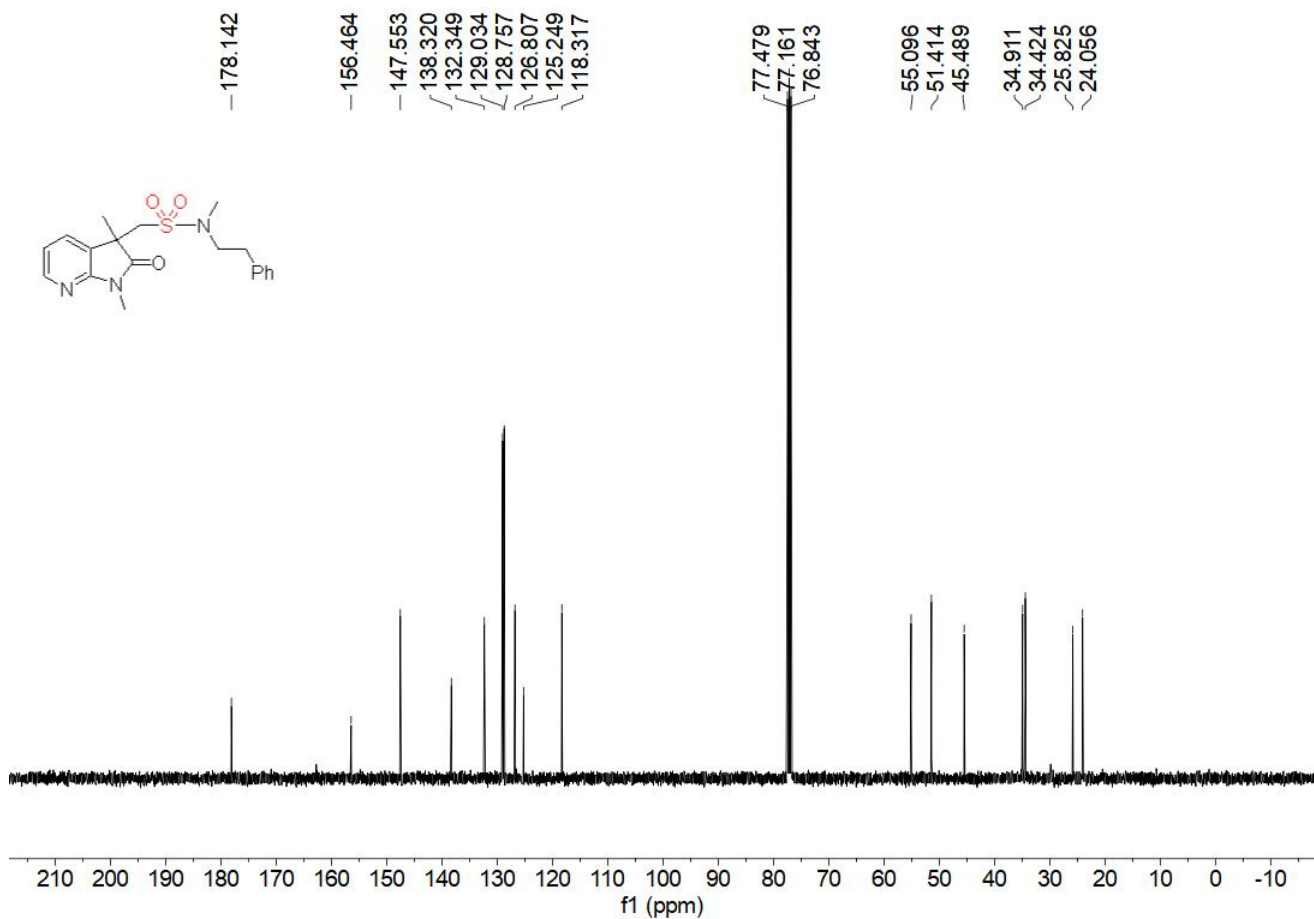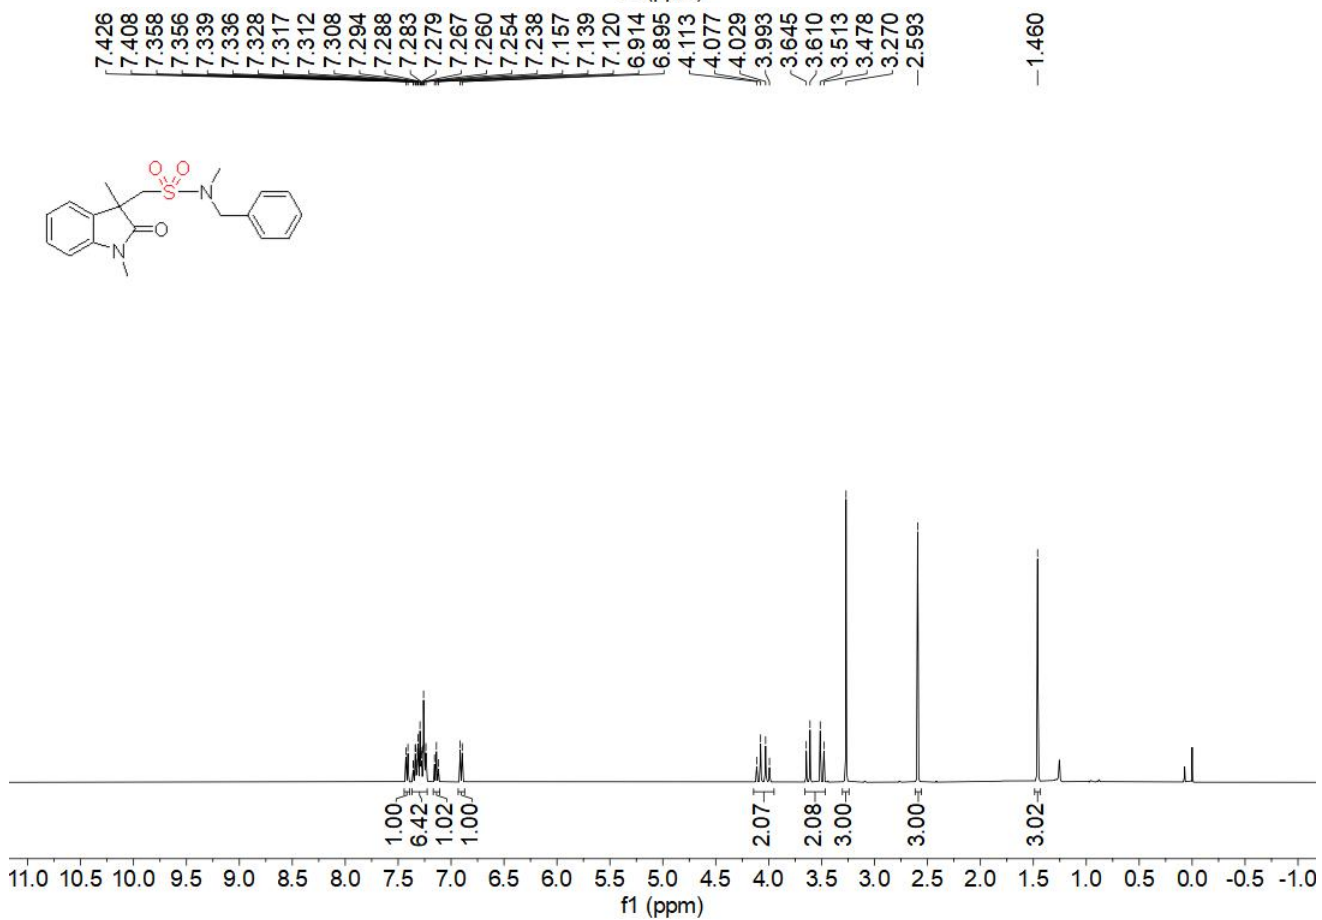



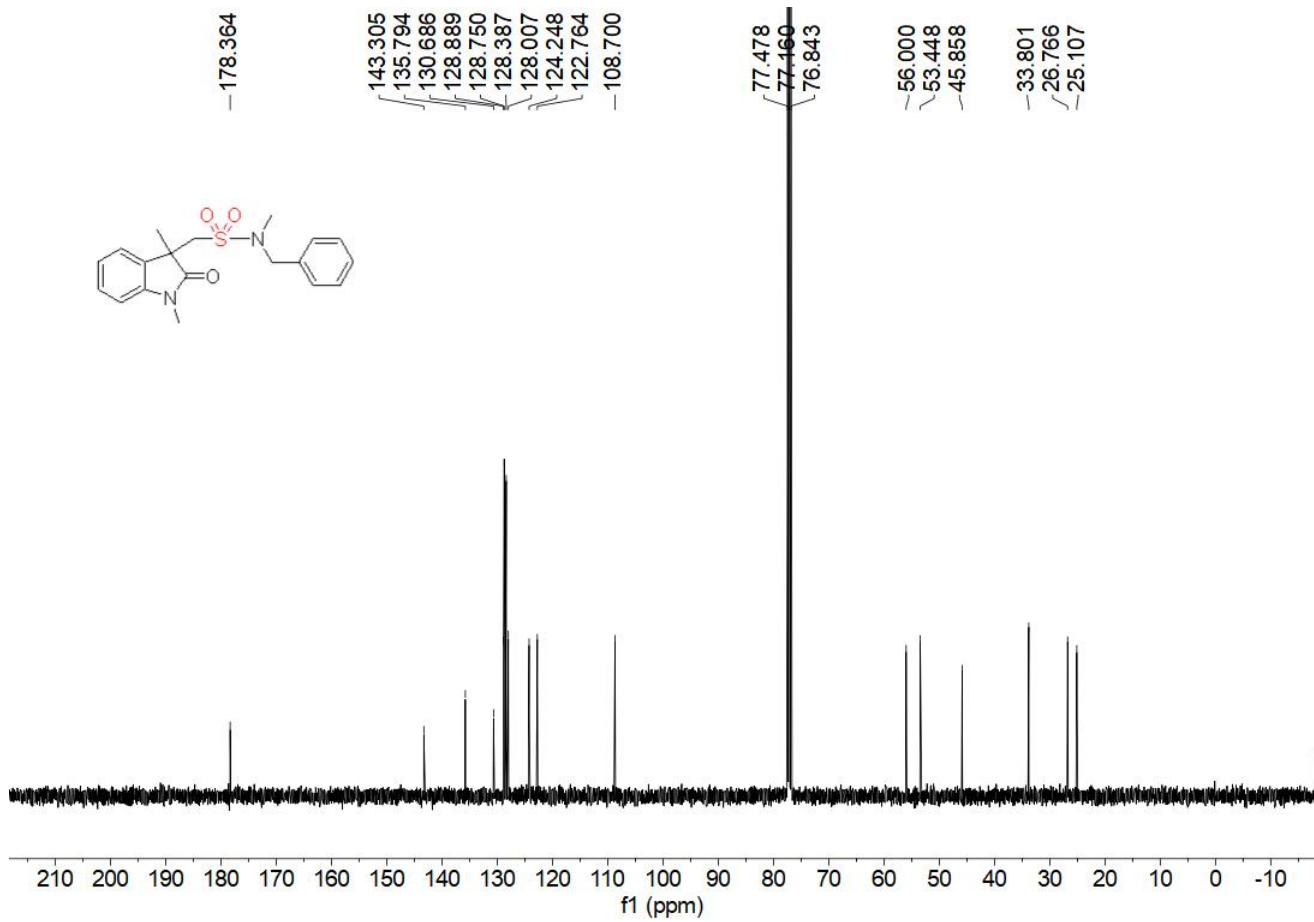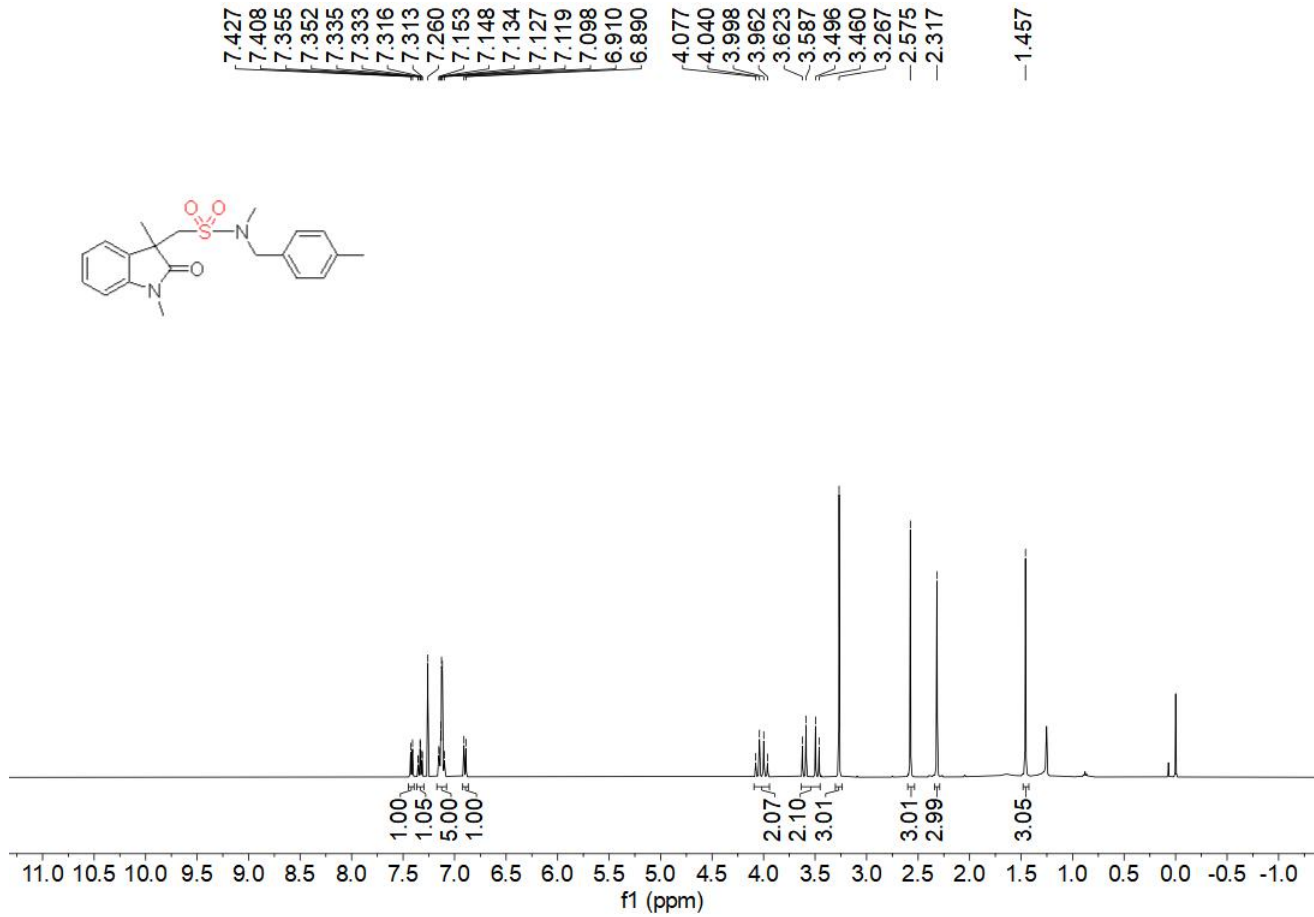



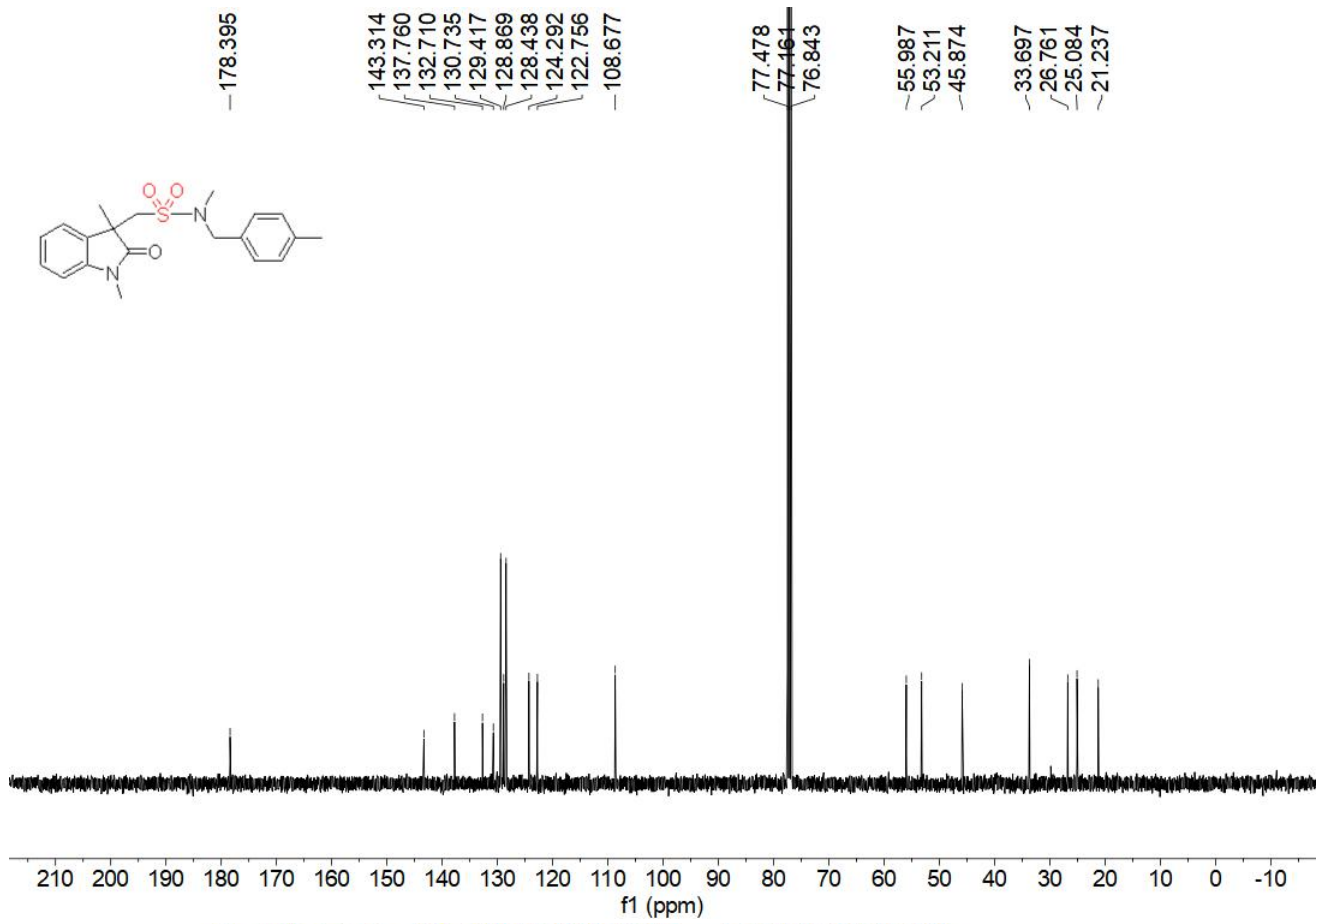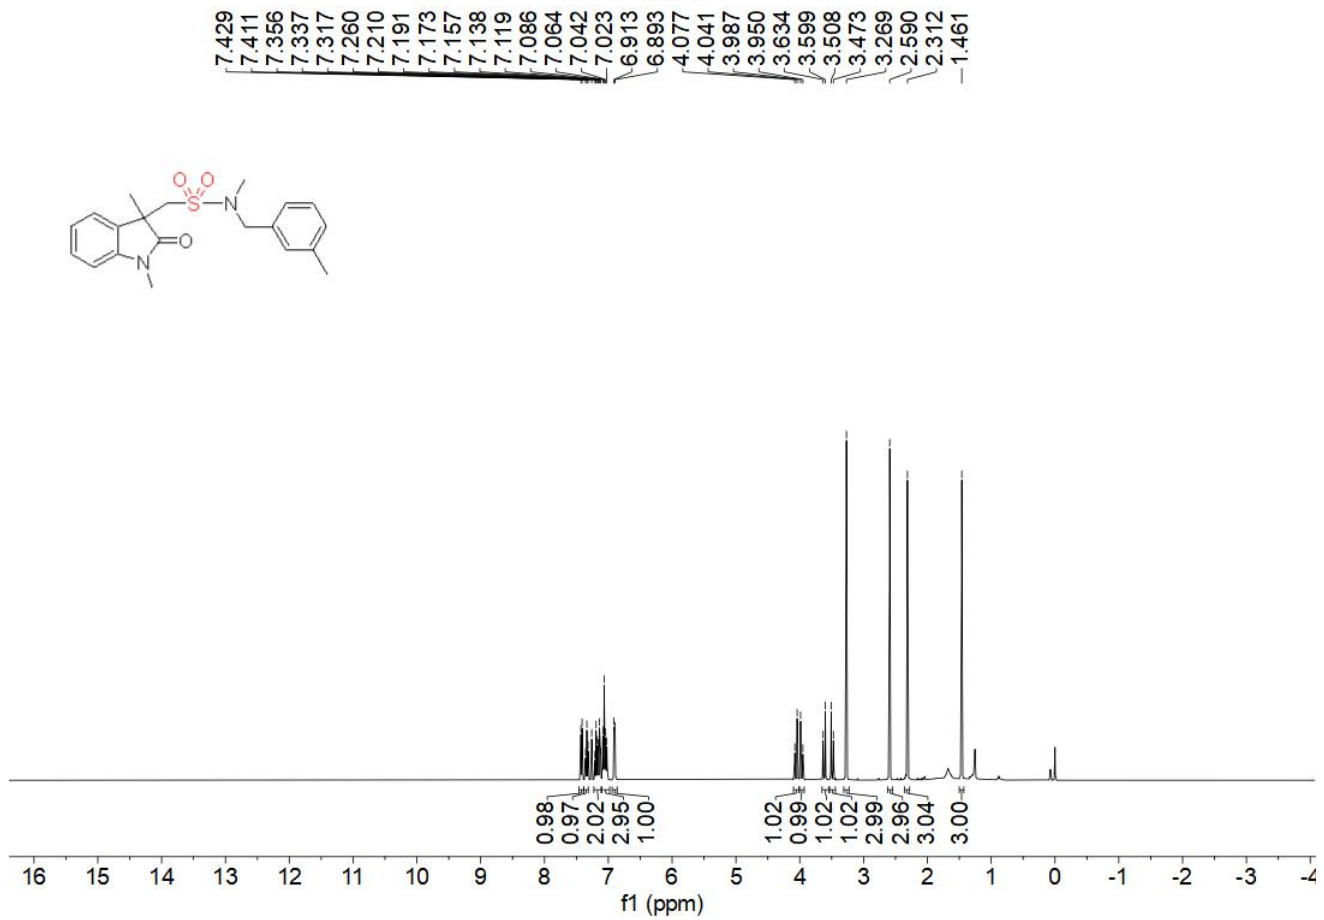

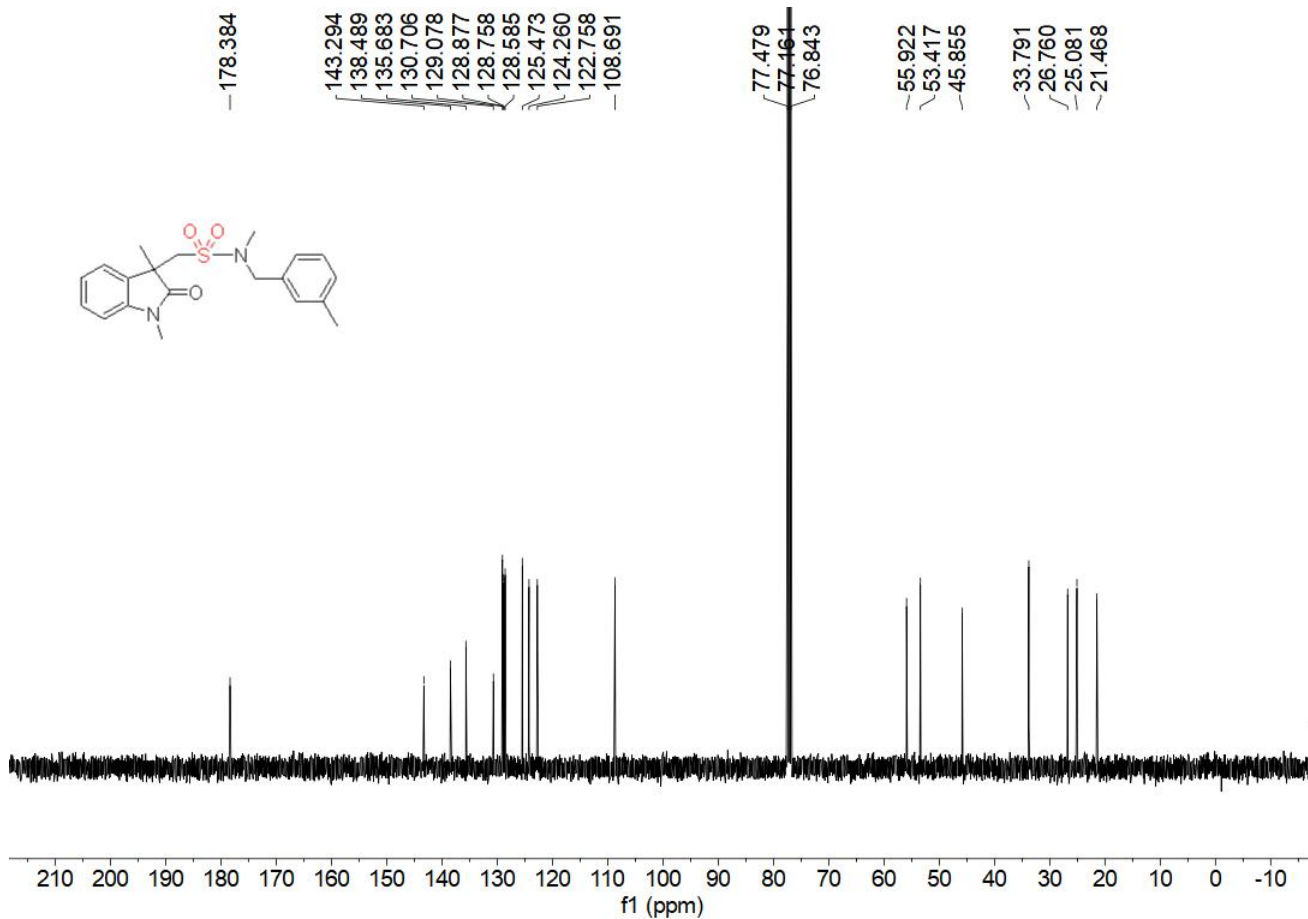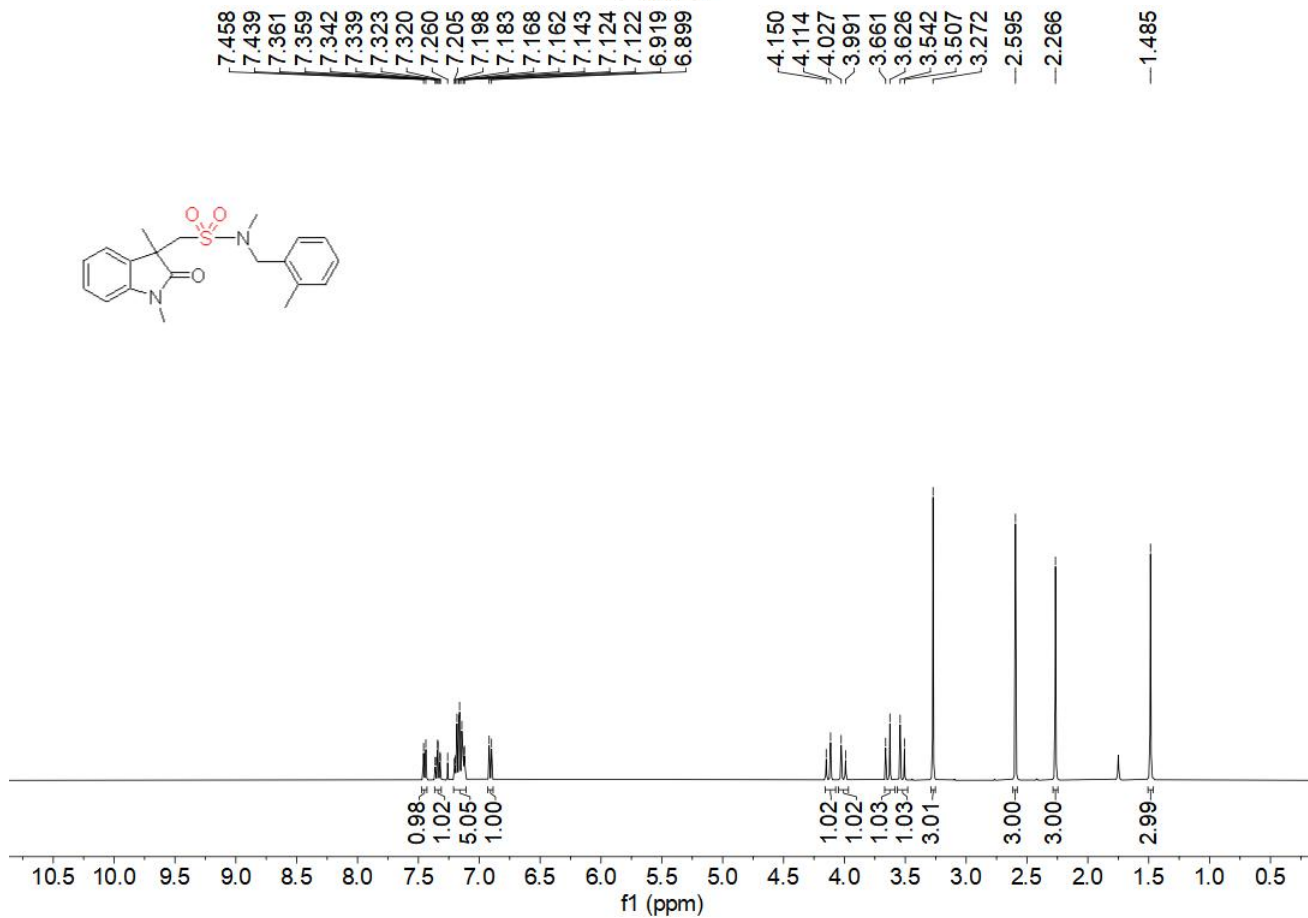

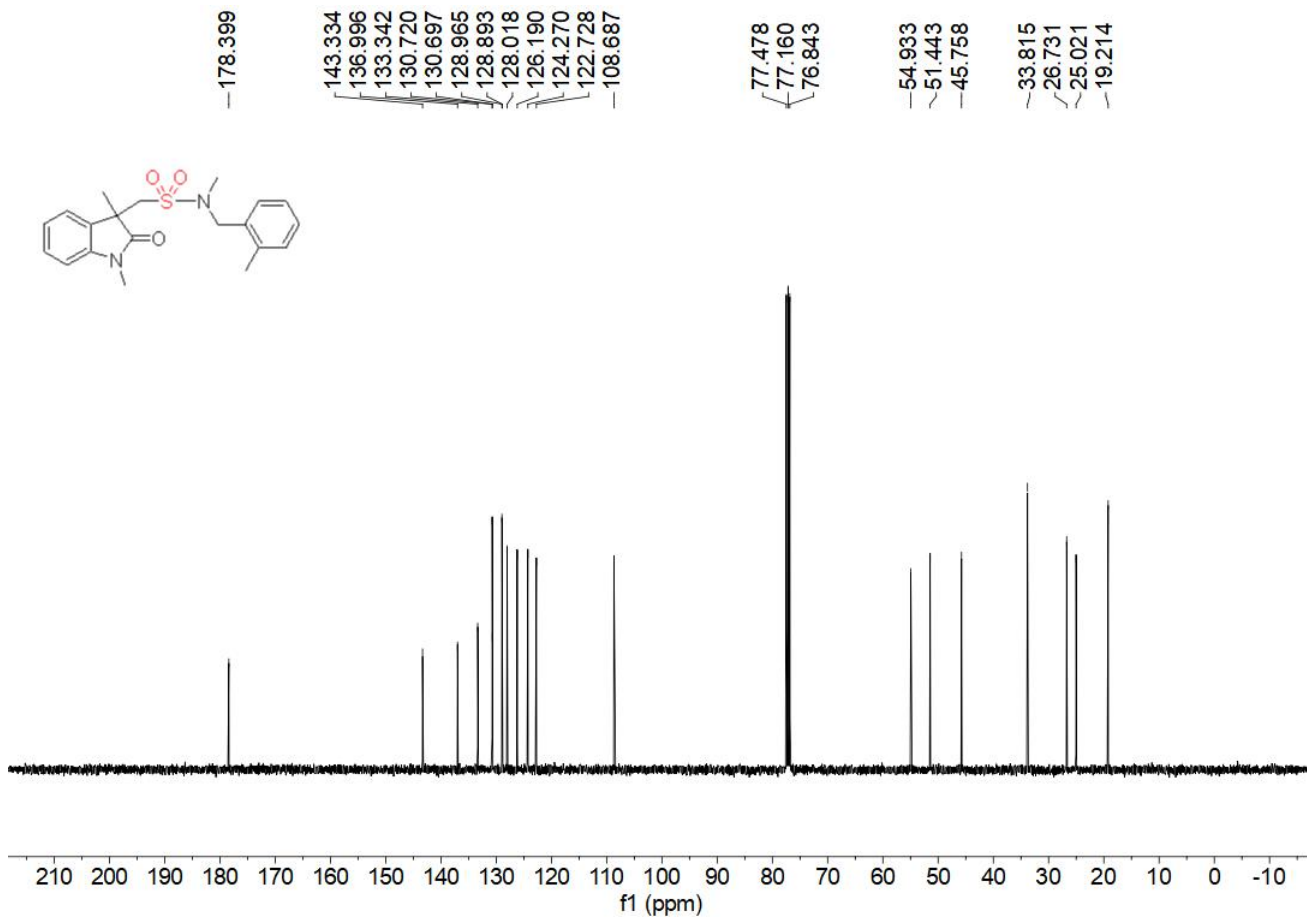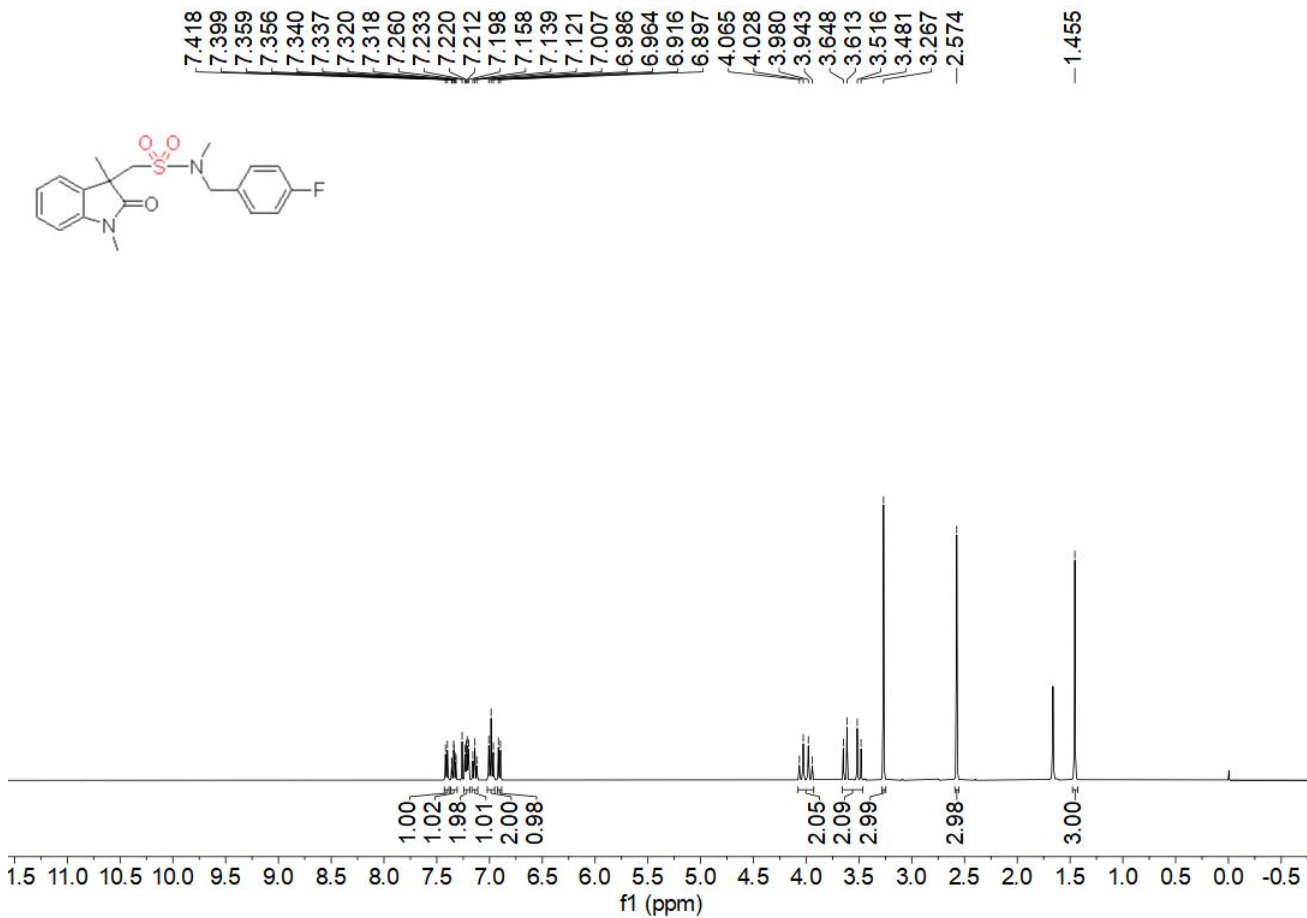

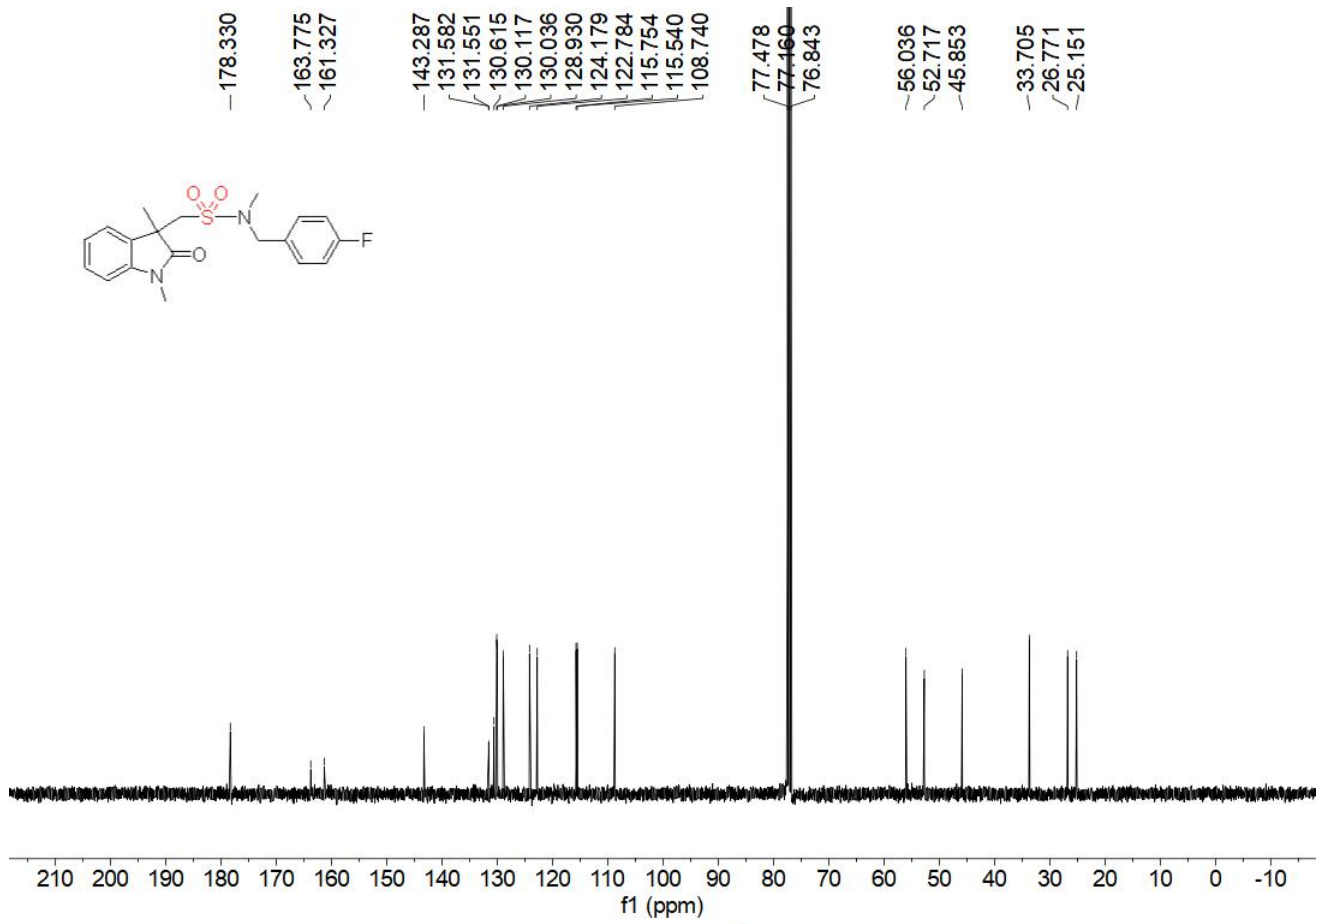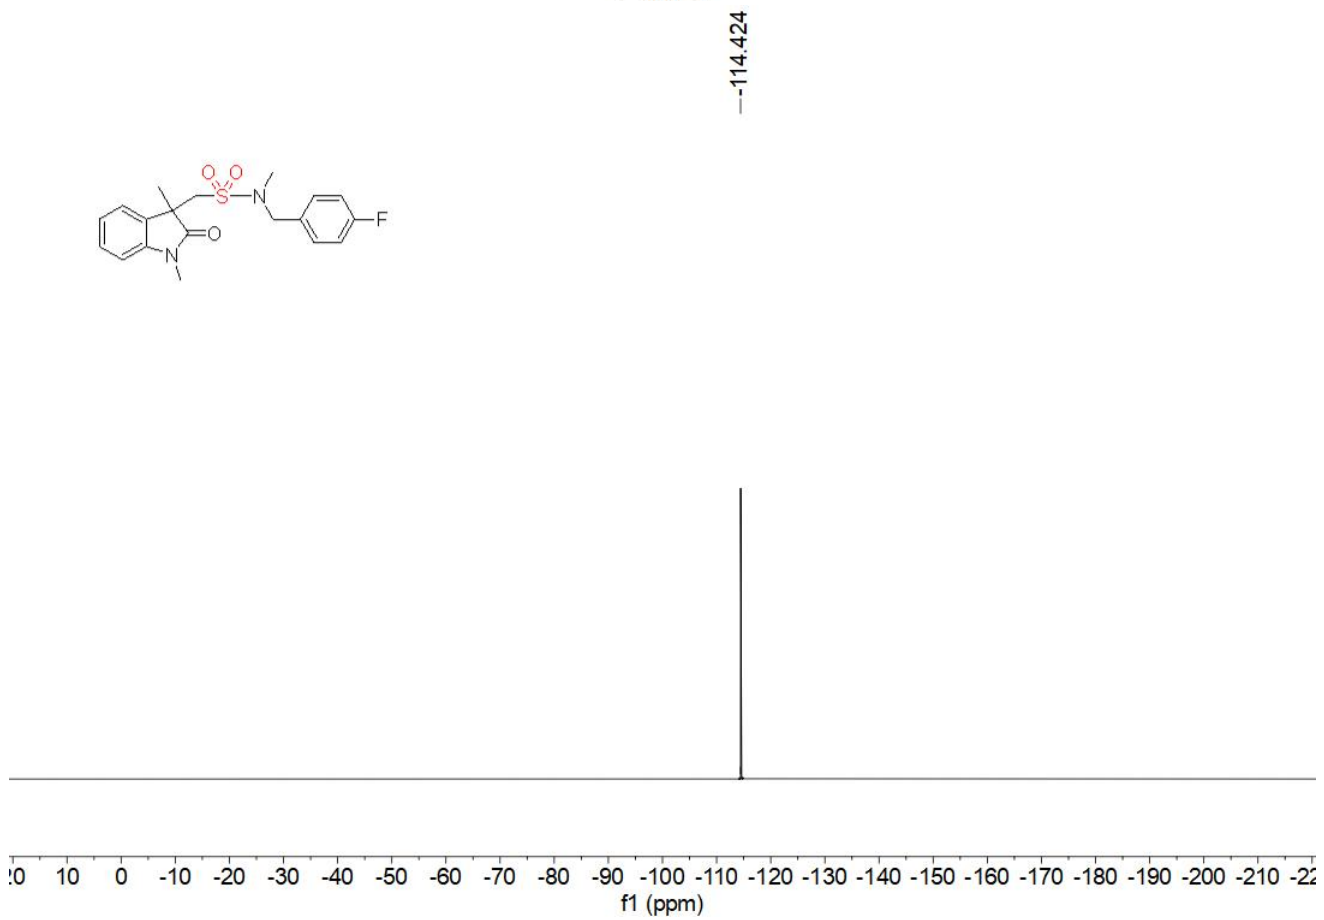

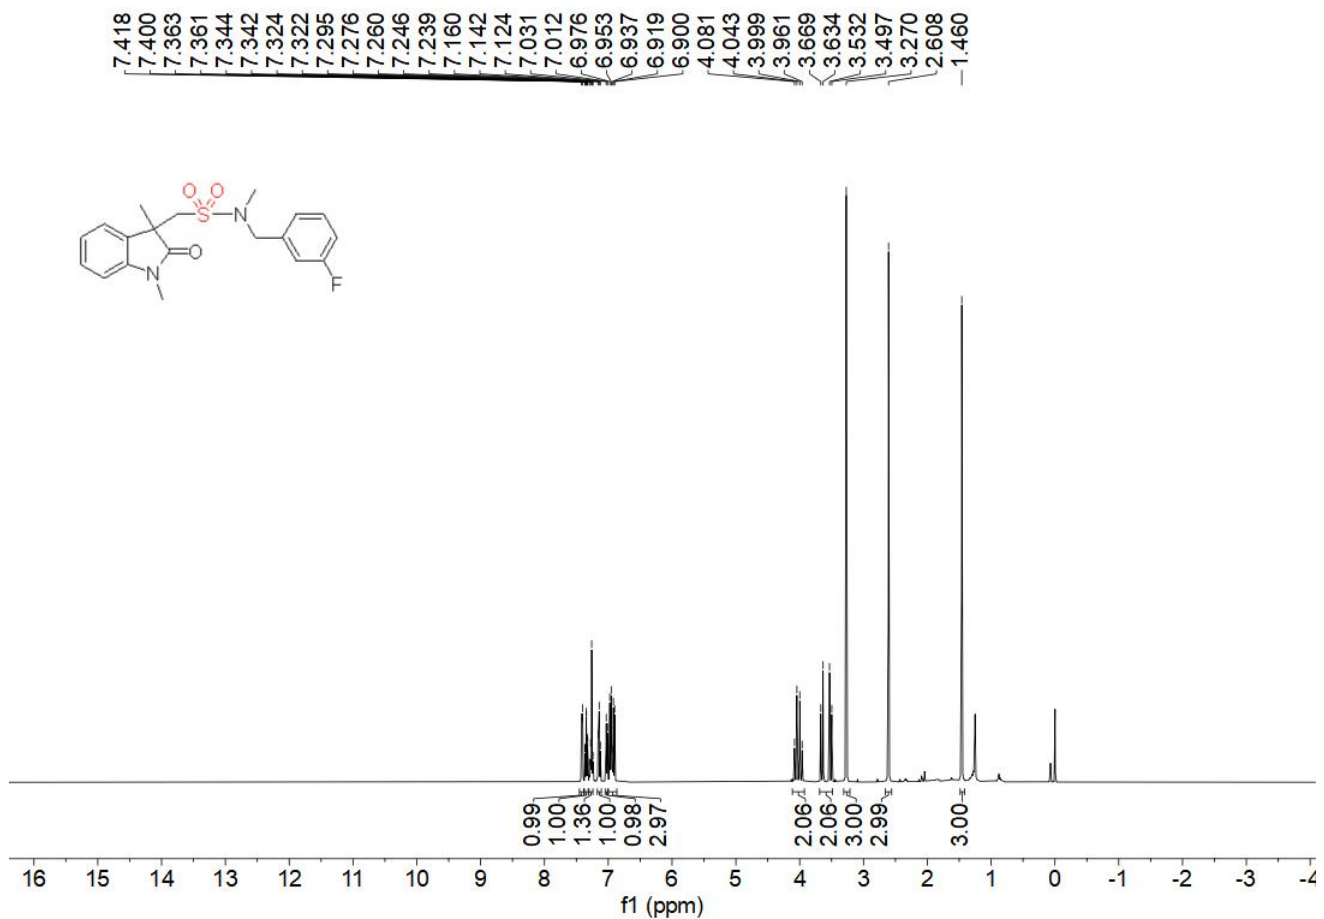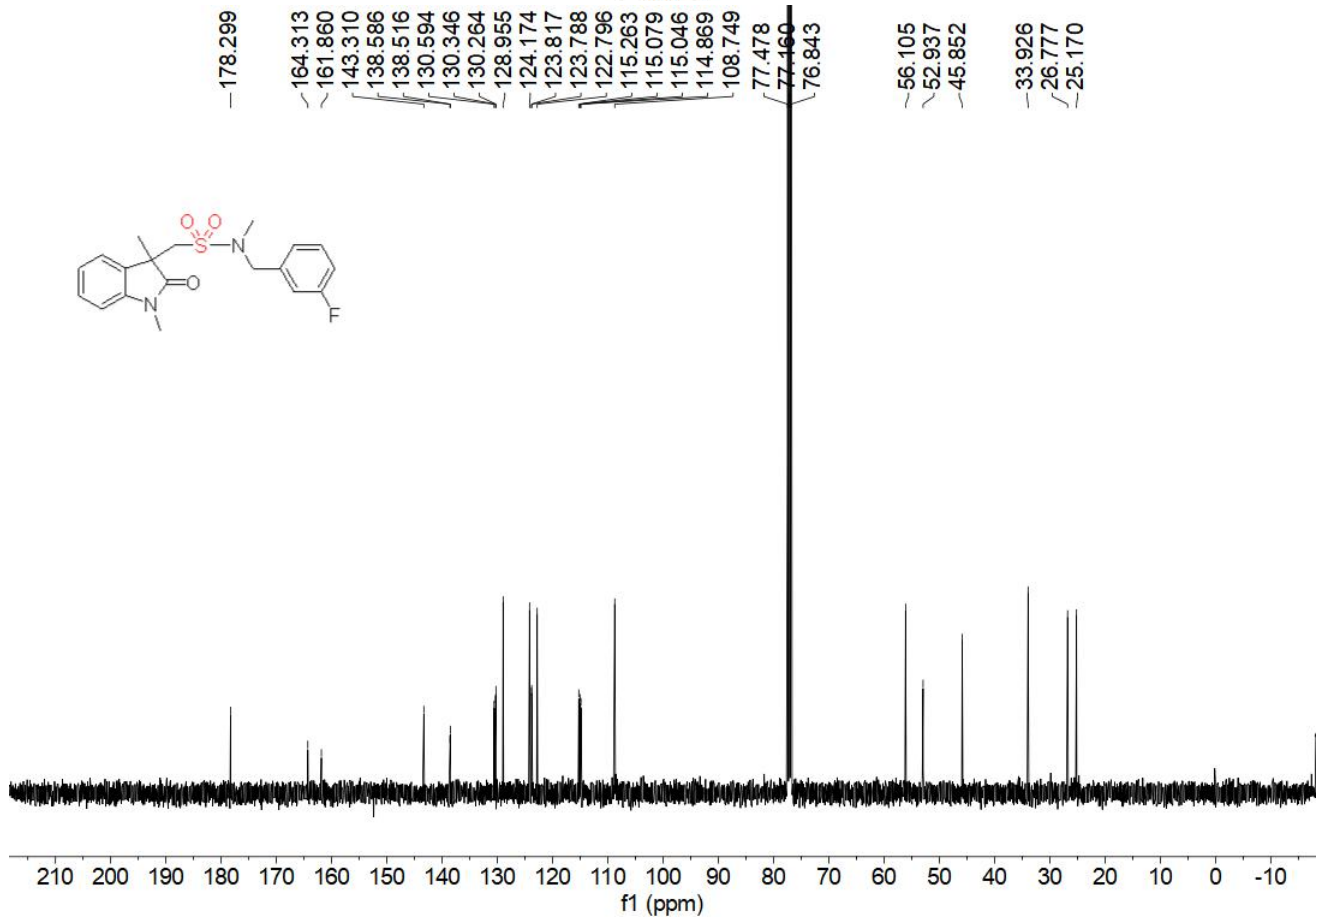

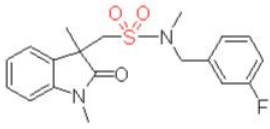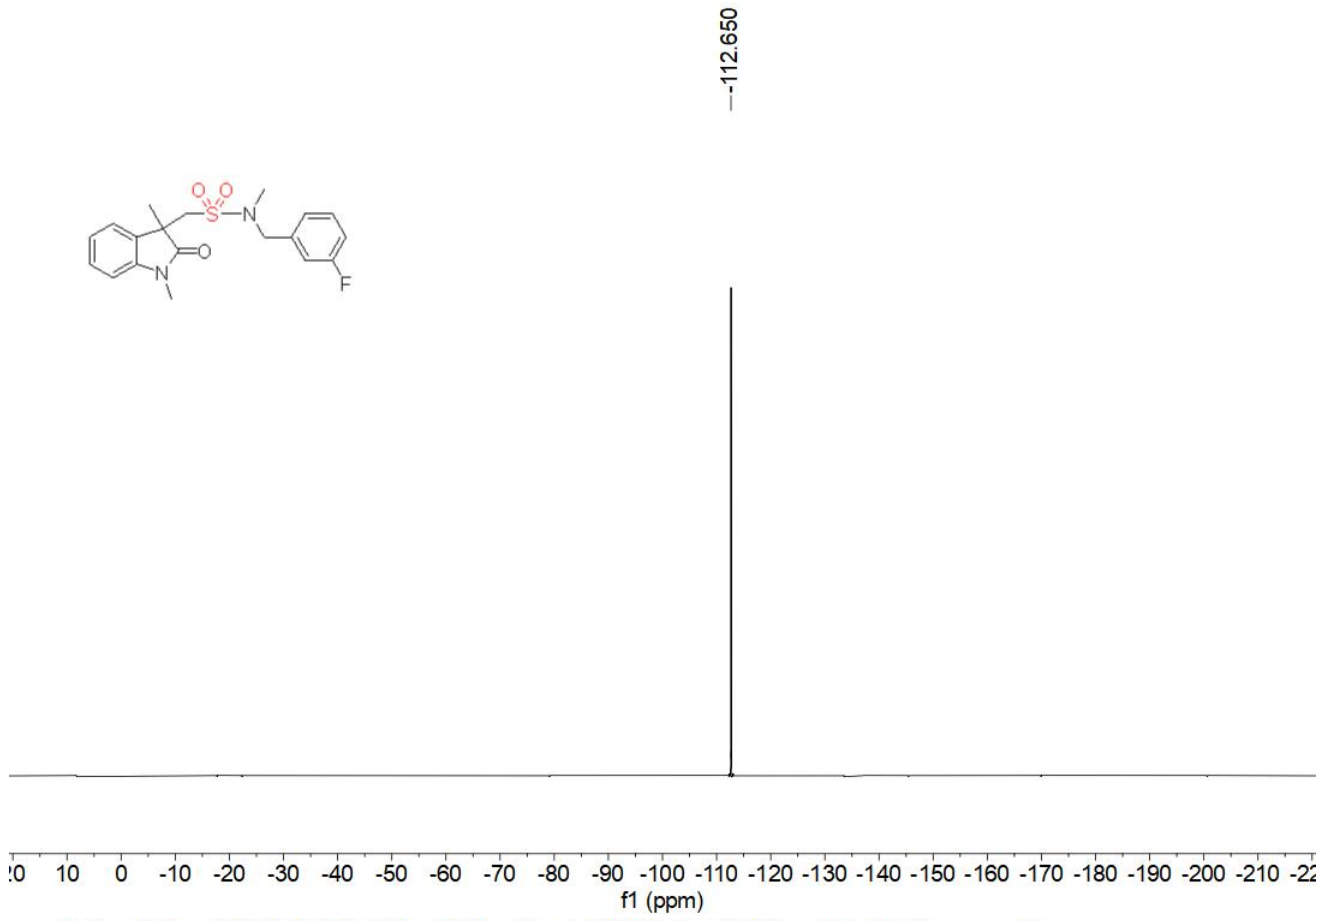

7.401  
7.400  
7.383  
7.381  
7.348  
7.345  
7.331  
7.329  
7.312  
7.309  
7.260  
7.242  
7.142  
7.140  
7.123  
7.121  
7.104  
7.102  
7.041  
7.039  
7.021  
7.017  
7.014  
6.995  
6.912  
6.892  
4.181  
4.143  
4.104  
4.066  
3.671  
3.635  
3.527  
3.492  
3.279  
3.259  
-1.449

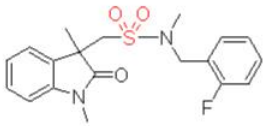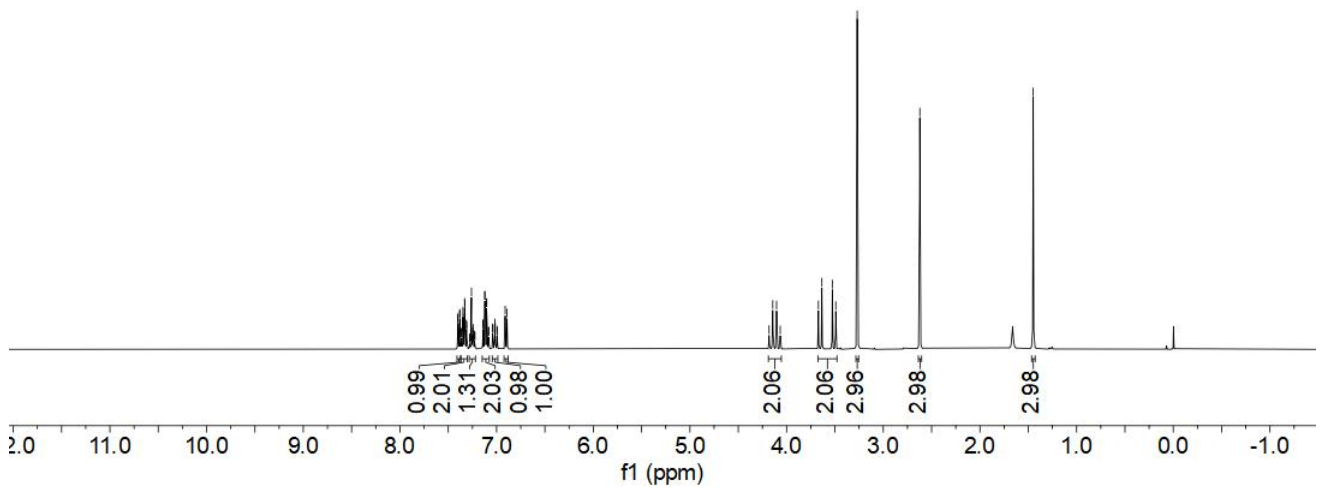

0.99  
2.01  
1.31  
2.03  
0.98  
1.00  
2.06  
2.06  
2.96  
2.98  
2.98

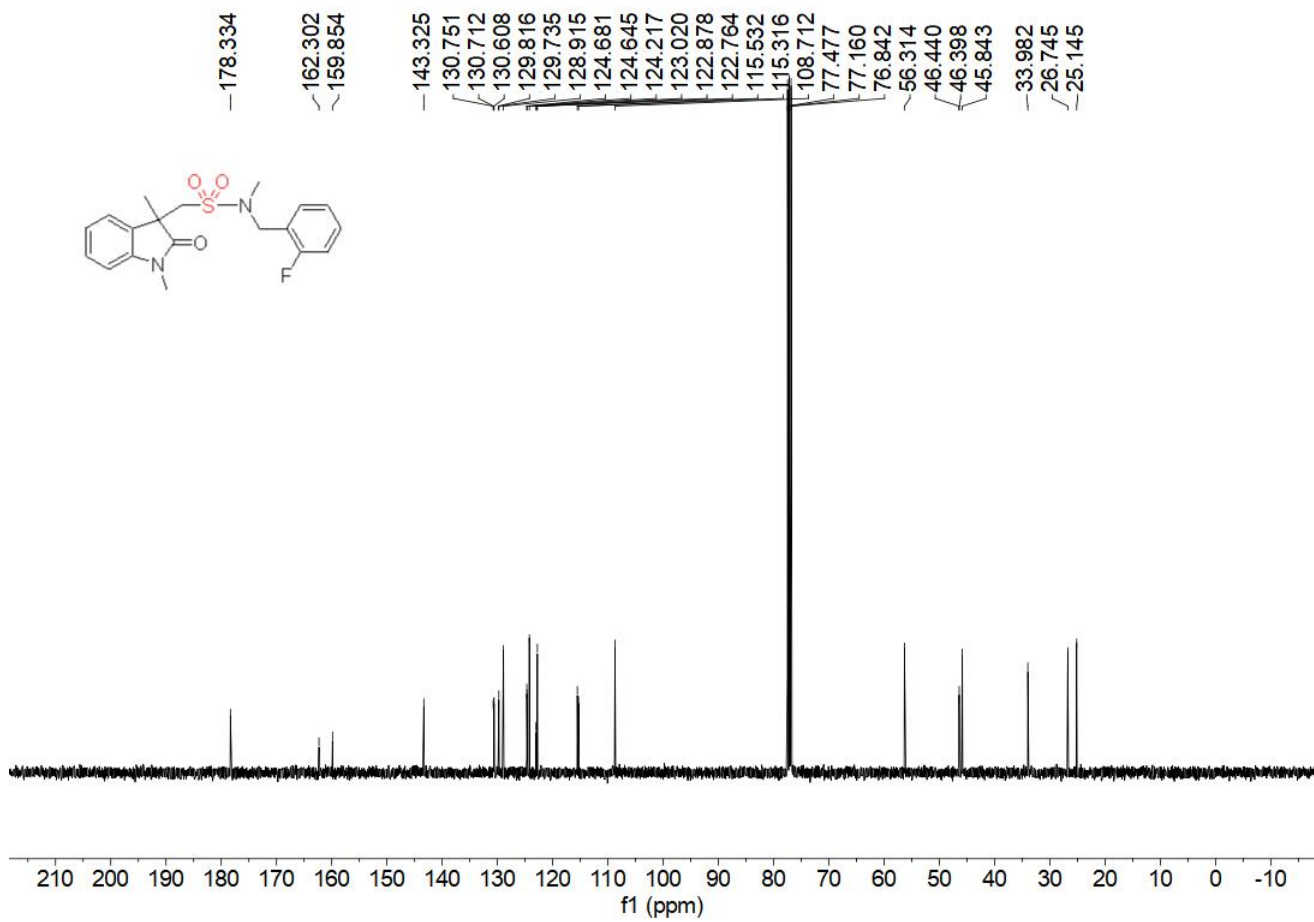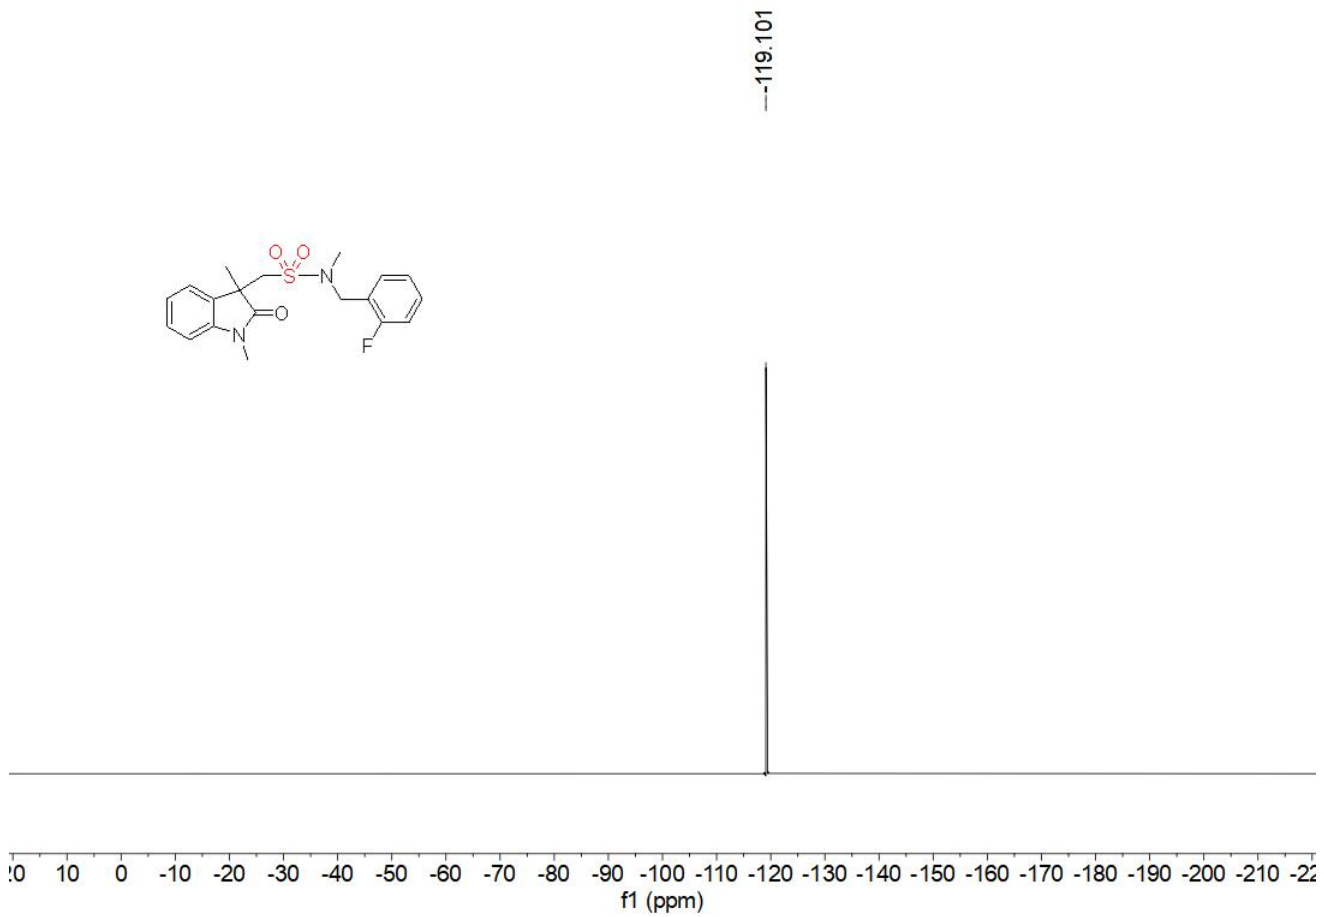



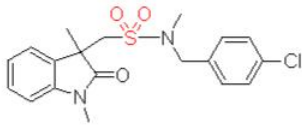

7.416  
7.397  
7.357  
7.338  
7.319  
7.282  
7.260  
7.189  
7.169  
7.157  
7.138  
7.119  
6.914  
6.895  
4.060  
4.023  
3.977  
3.940  
3.651  
3.616  
3.522  
3.487  
3.266  
-2.579  
-1.456

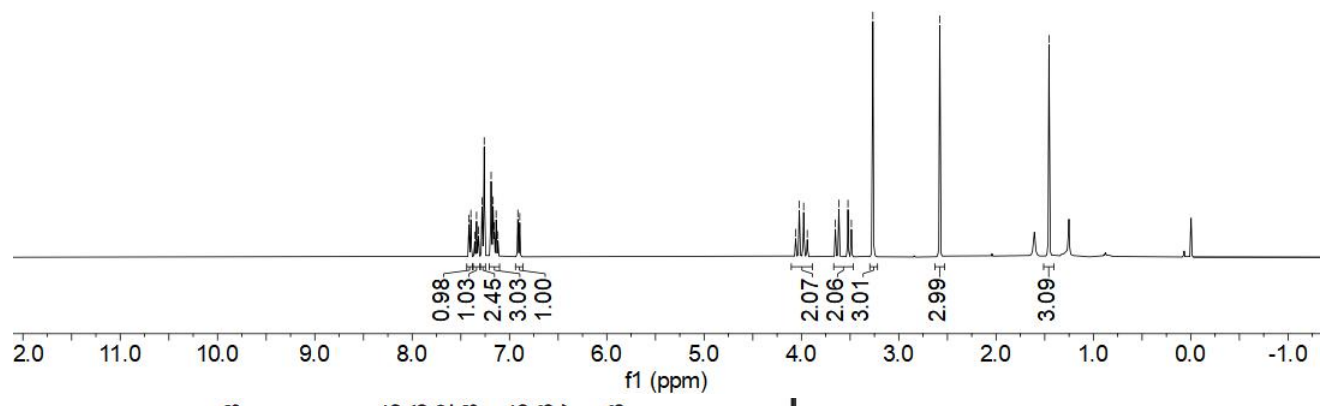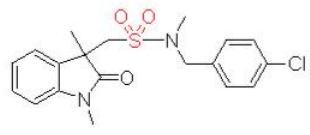

-178.308  
143.315  
134.406  
133.902  
130.618  
129.701  
128.945  
124.193  
122.797  
-108.743  
77.478  
77.161  
76.843  
56.110  
52.799  
45.867  
33.809  
26.780  
25.163

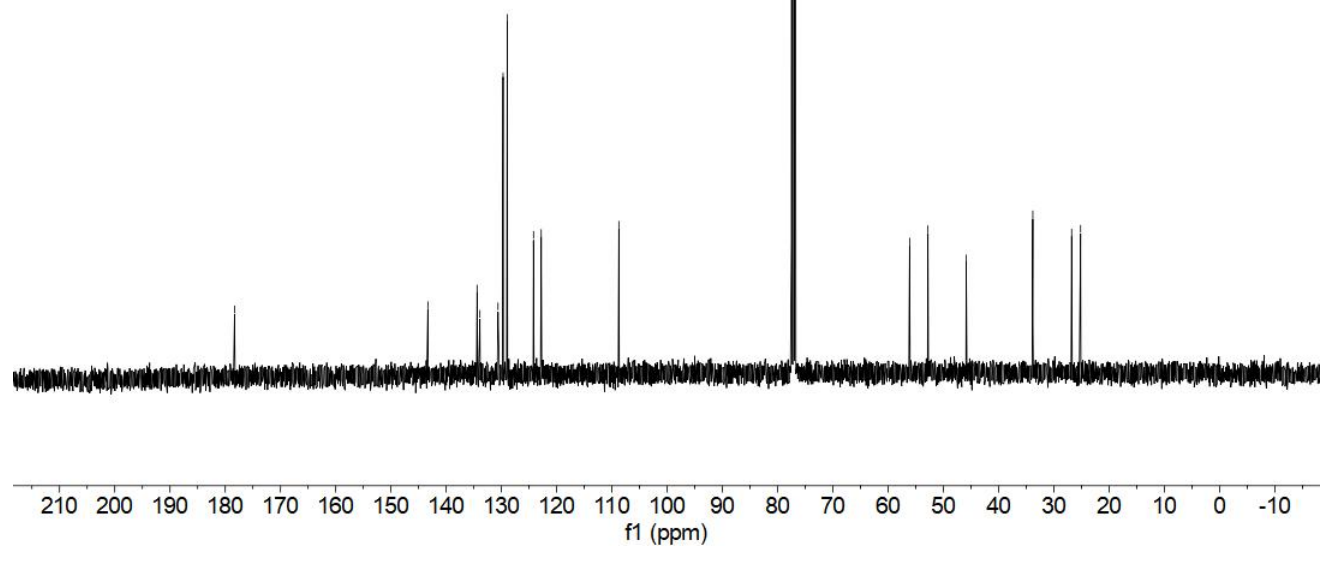



7.412  
7.393  
7.359  
7.357  
7.340  
7.337  
7.321  
7.318  
7.260  
7.240  
7.227  
7.207  
7.158  
7.156  
7.148  
7.139  
7.132  
7.127  
6.916  
6.897  
4.053  
4.016  
3.964  
3.926  
3.670  
3.634  
3.533  
3.498  
3.266  
2.594  
-1.455

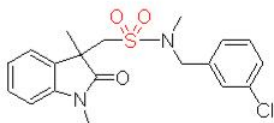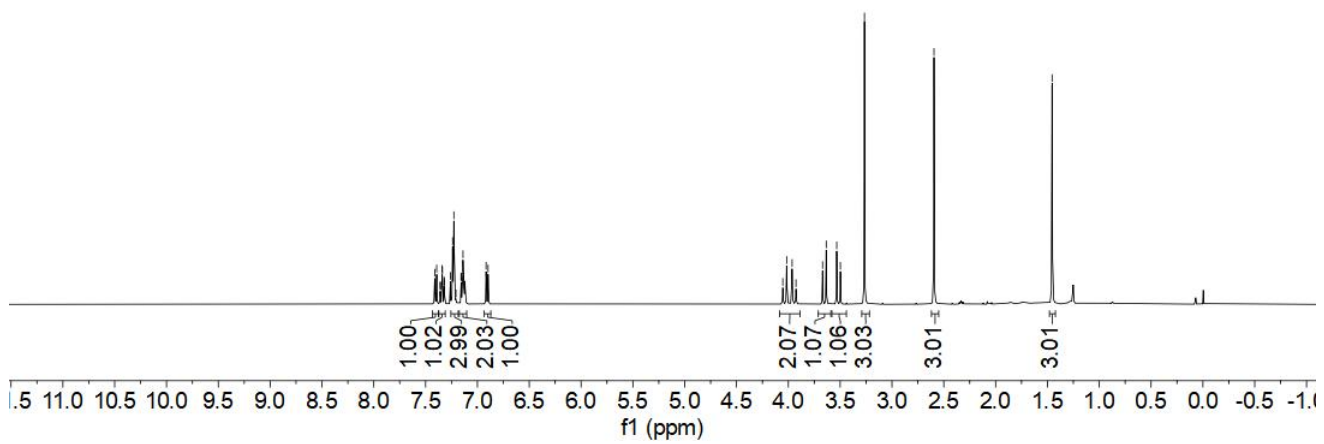

178.273  
143.293  
138.023  
134.623  
130.568  
130.063  
128.943  
128.300  
128.201  
126.383  
124.127  
122.776  
108.742  
77.478  
77.160  
76.843  
56.100  
52.862  
45.824  
33.897  
26.757  
25.159

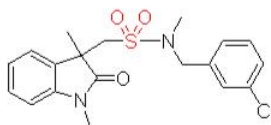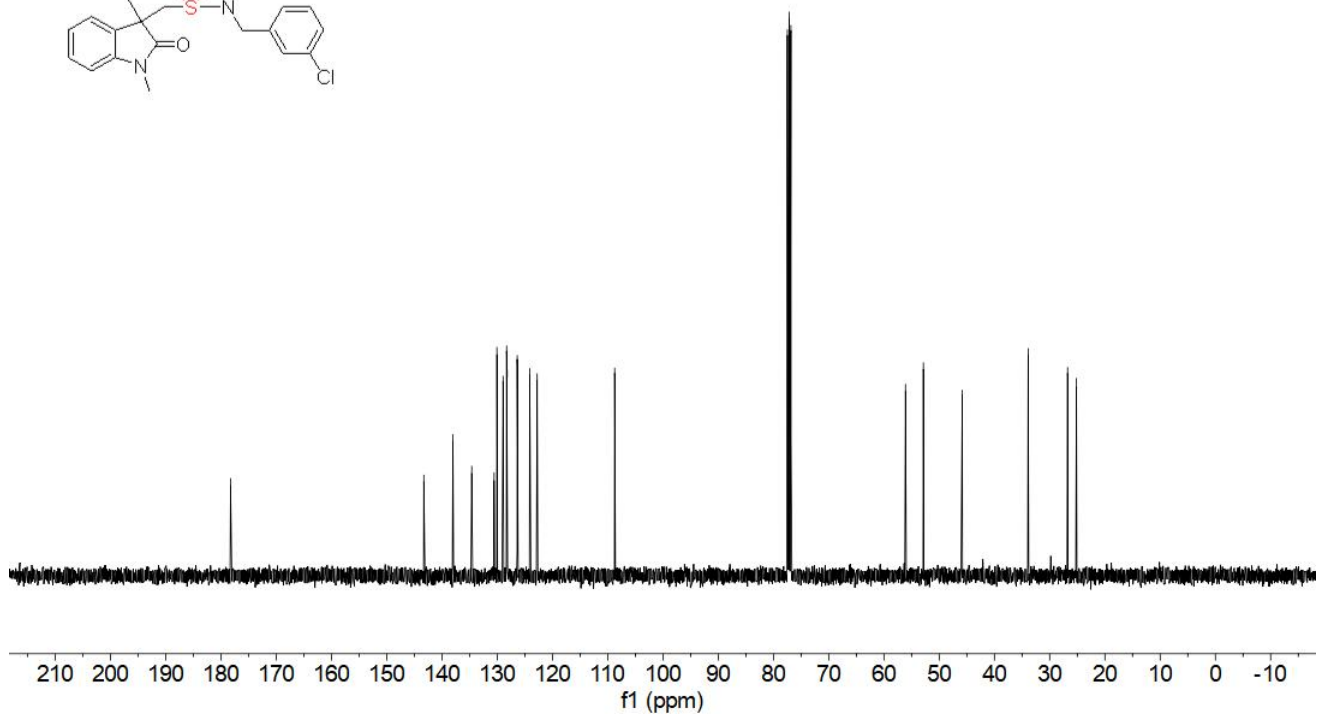

7.412  
7.406  
7.395  
7.383  
7.364  
7.361  
7.344  
7.341  
7.325  
7.322  
7.260  
7.203  
7.200  
7.190  
7.188  
7.181  
7.173  
7.160  
7.154  
7.142  
7.124  
7.123  
6.918  
6.899  
4.053  
4.016  
3.967  
3.930  
3.667  
3.631  
3.528  
3.492  
3.269  
2.599  
1.458

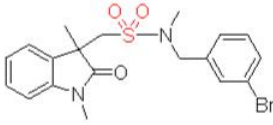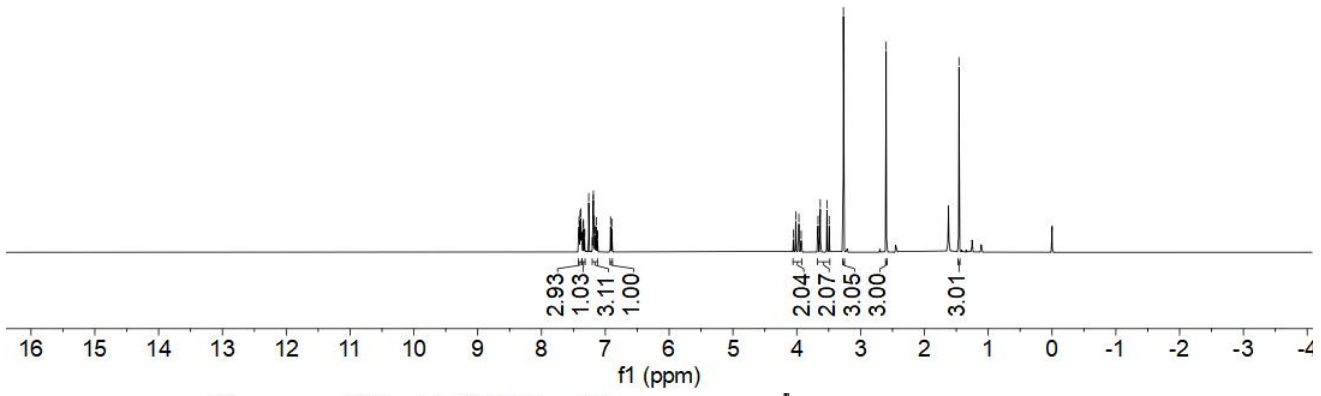

178.313  
143.334  
138.316  
131.251  
131.190  
130.604  
130.390  
128.980  
126.902  
124.171  
122.814  
108.767  
77.478  
77.461  
76.843  
56.150  
52.856  
45.858  
33.936  
26.781  
25.178

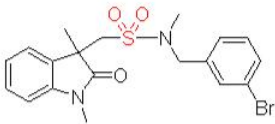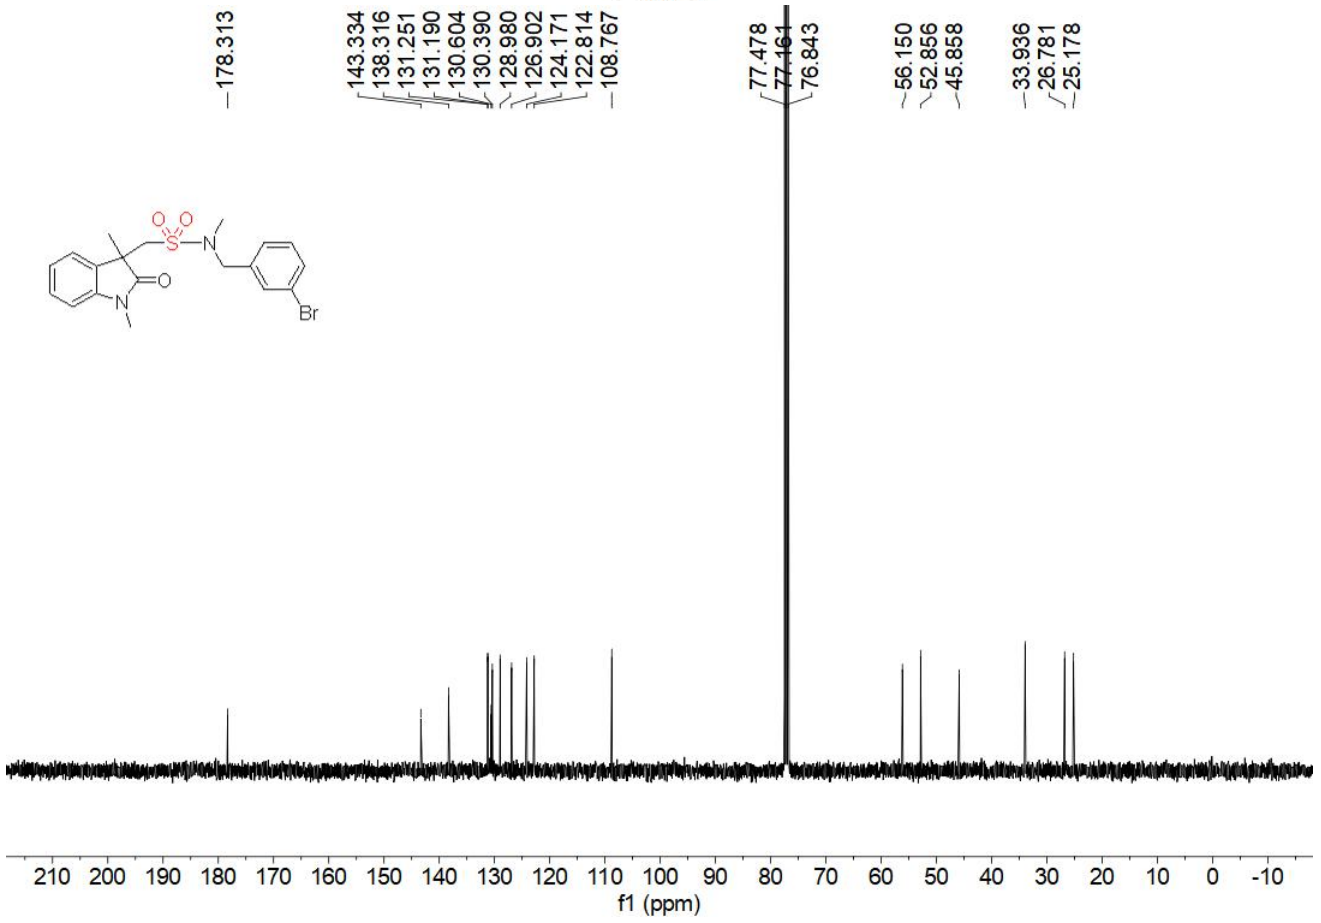

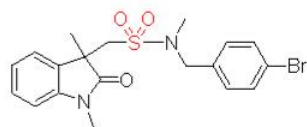

7.434  
7.414  
7.396  
7.359  
7.357  
7.340  
7.338  
7.321  
7.318  
7.260  
7.156  
7.137  
7.131  
7.118  
7.110  
6.916  
6.896  
4.041  
4.004  
3.956  
3.919  
3.655  
3.619  
3.526  
3.490  
3.266  
2.577  
1.456

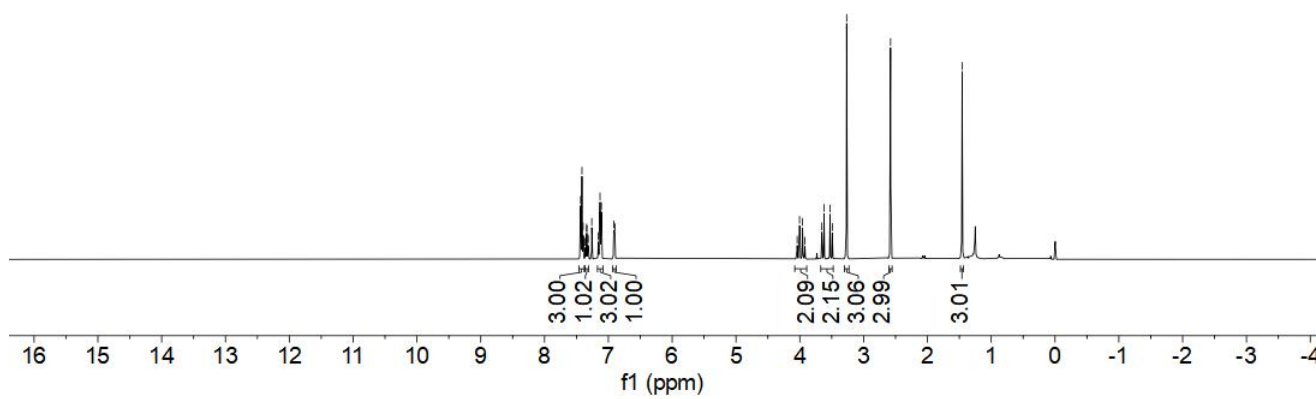

178.294  
143.286  
134.917  
131.882  
130.582  
130.016  
128.944  
124.161  
122.788  
121.987  
108.745  
77.477  
77.160  
76.842  
56.068  
52.826  
45.846  
33.805  
26.772  
25.154

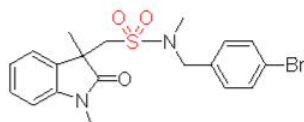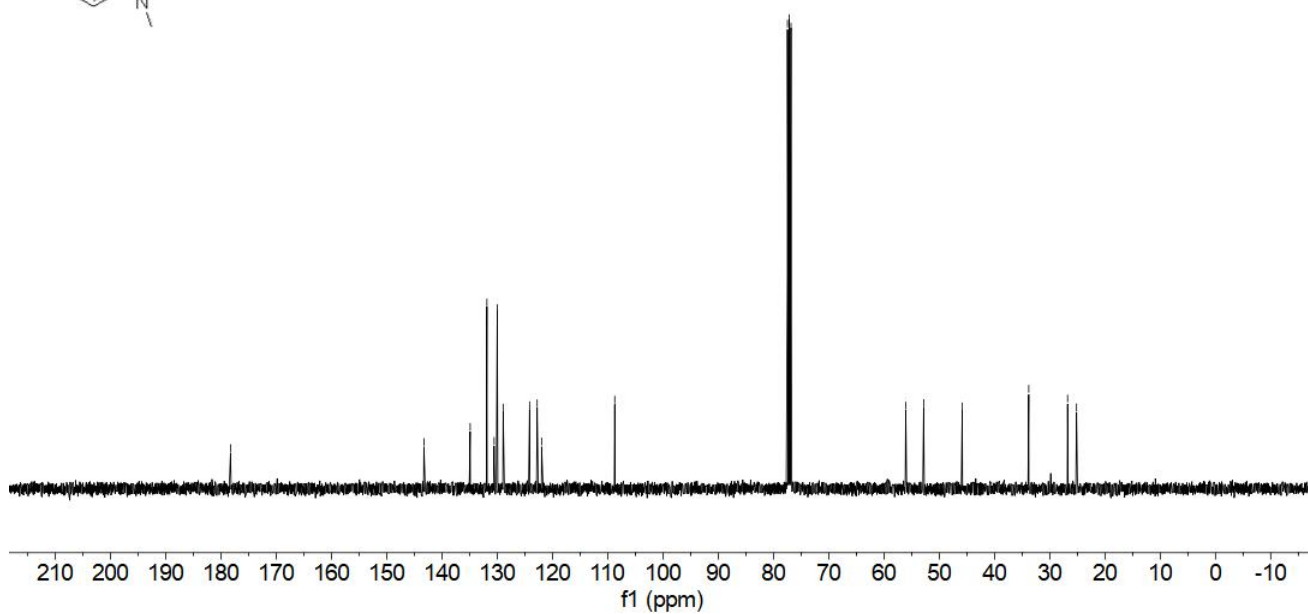

8.170  
8.147  
7.856  
7.839  
7.833  
7.816  
7.797  
7.506  
7.500  
7.491  
7.482  
7.476  
7.466  
7.410  
7.390  
7.385  
7.382  
7.371  
7.369  
7.352  
7.350  
7.260  
7.187  
7.169  
6.942  
6.933  
6.933  
4.598  
4.526  
4.491  
3.702  
3.667  
3.583  
3.548  
3.288  
2.603  
1.508

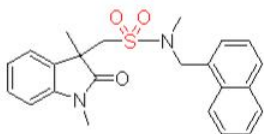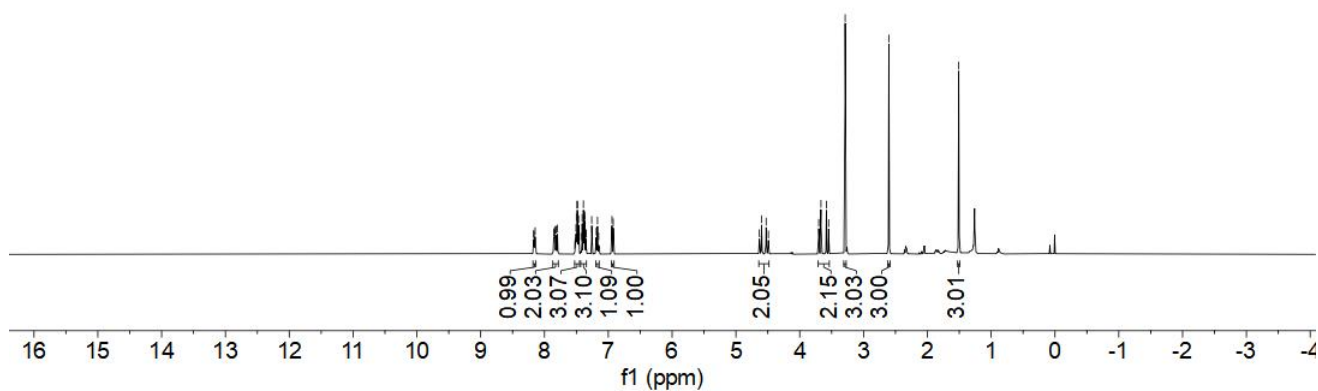

-178.464

-143.392  
-133.987  
-131.698  
-130.804  
-130.727  
-129.140  
-128.960  
-128.692  
-127.438  
-126.700  
-126.134  
-125.190  
-124.343  
-123.883  
-122.795  
-108.755  
-77.477  
-77.160  
-76.842  
-54.709  
-51.857  
-45.804  
-33.949  
-26.796  
-25.020

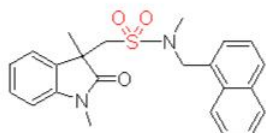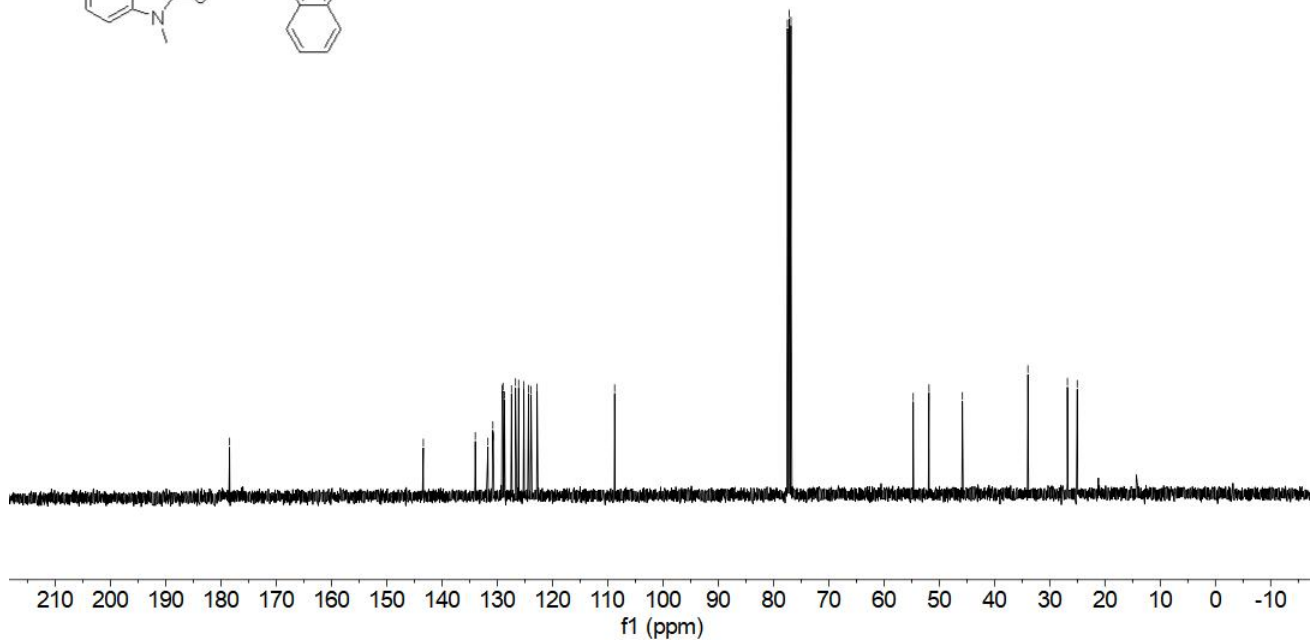

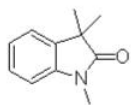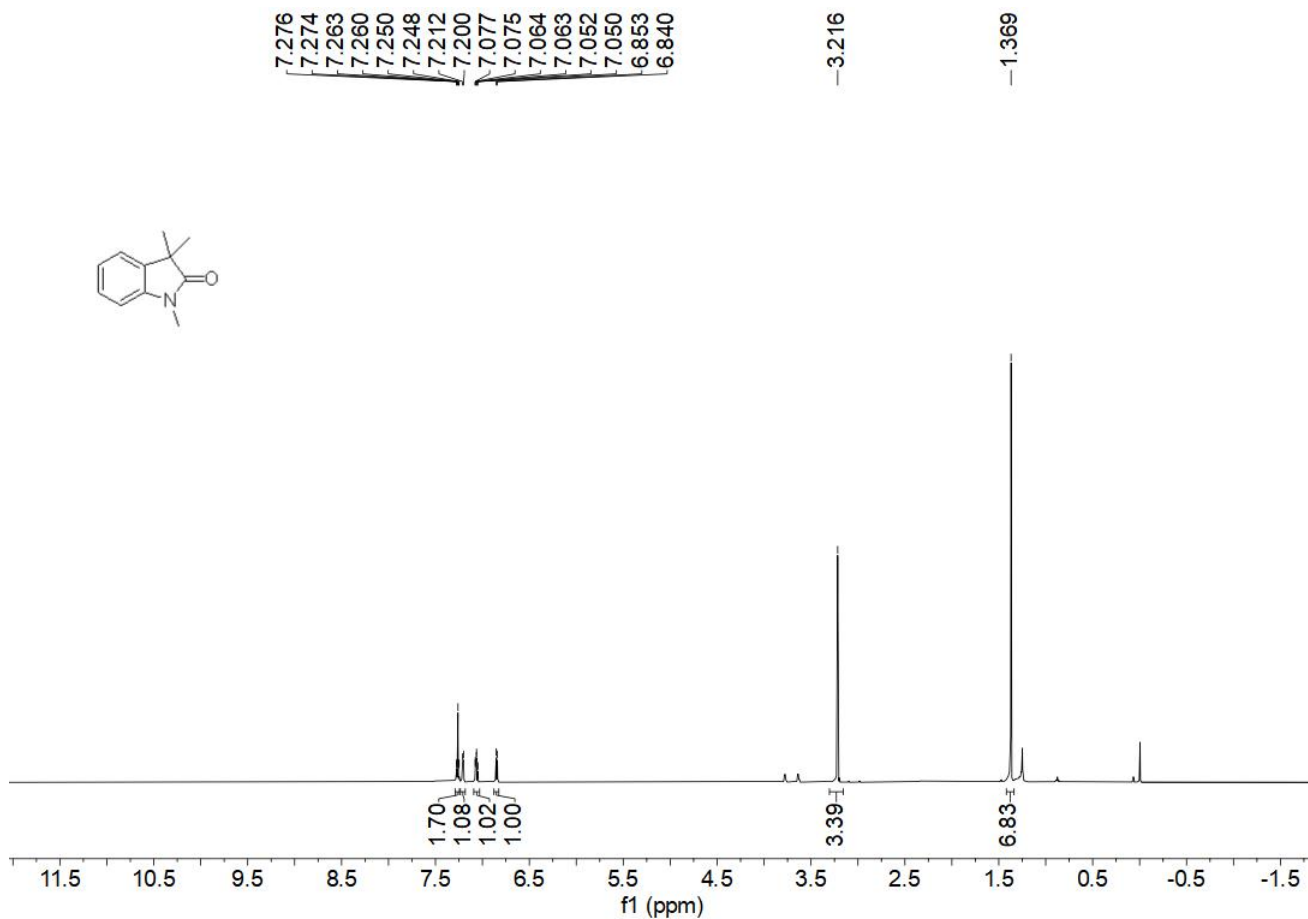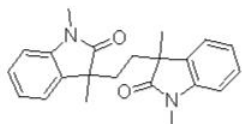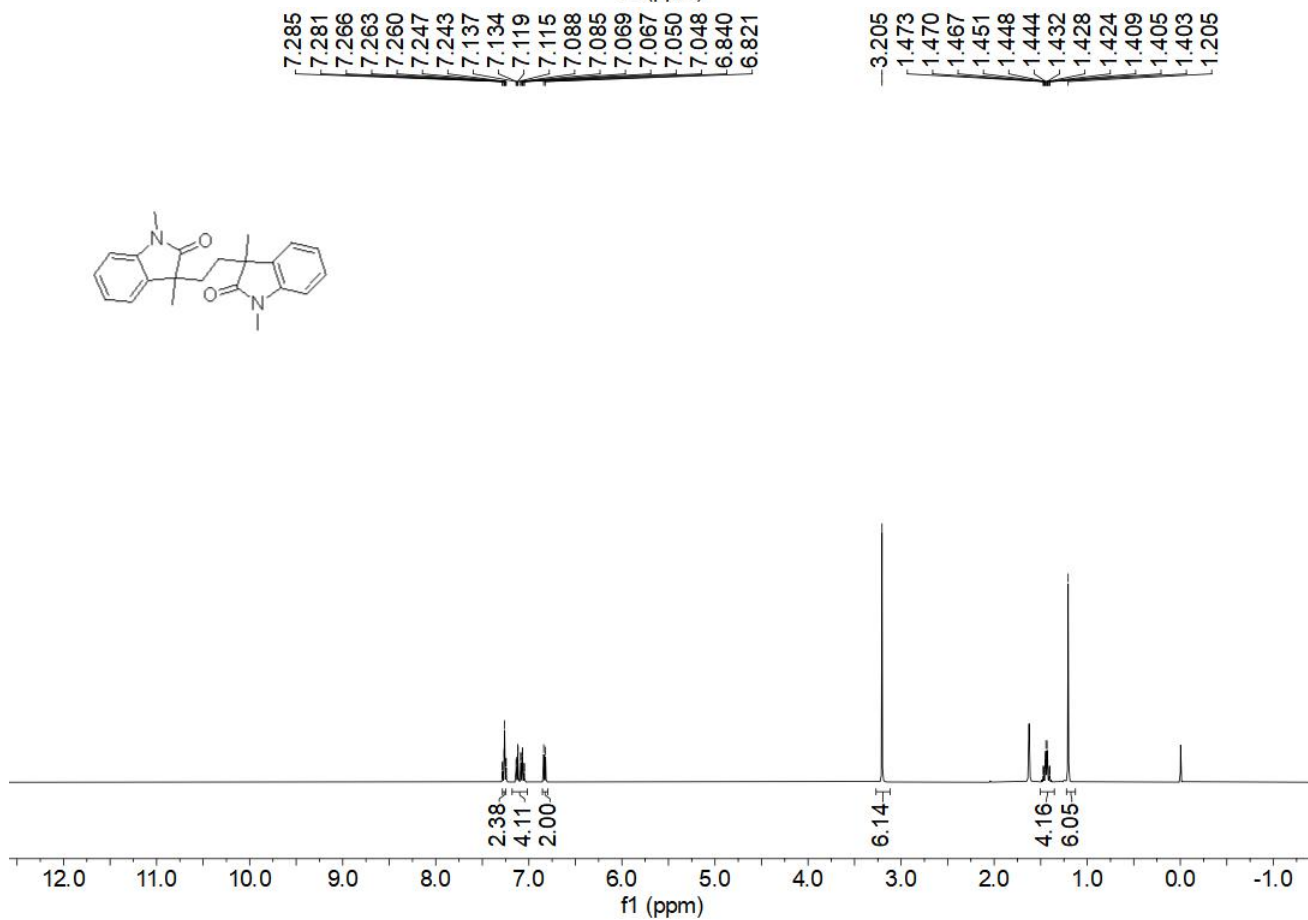

7.268  
7.264  
7.260  
7.249  
7.245  
7.230  
7.226  
7.050  
7.048  
7.032  
7.030  
7.014  
7.011  
6.999  
6.998  
6.995  
6.994  
6.981  
6.980  
6.977  
6.975  
6.818  
6.816  
6.814  
6.798  
6.796  
6.794  
3.175  
1.771  
1.721  
1.715  
1.711  
1.701  
1.680  
1.677  
1.654  
1.650  
1.645  
1.633  
1.397  
1.385  
1.380  
1.377  
1.353  
1.350  
1.329  
1.320  
1.315  
1.309  
1.254  
1.238

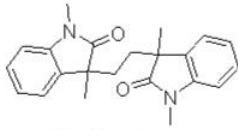

Diastereoisomer

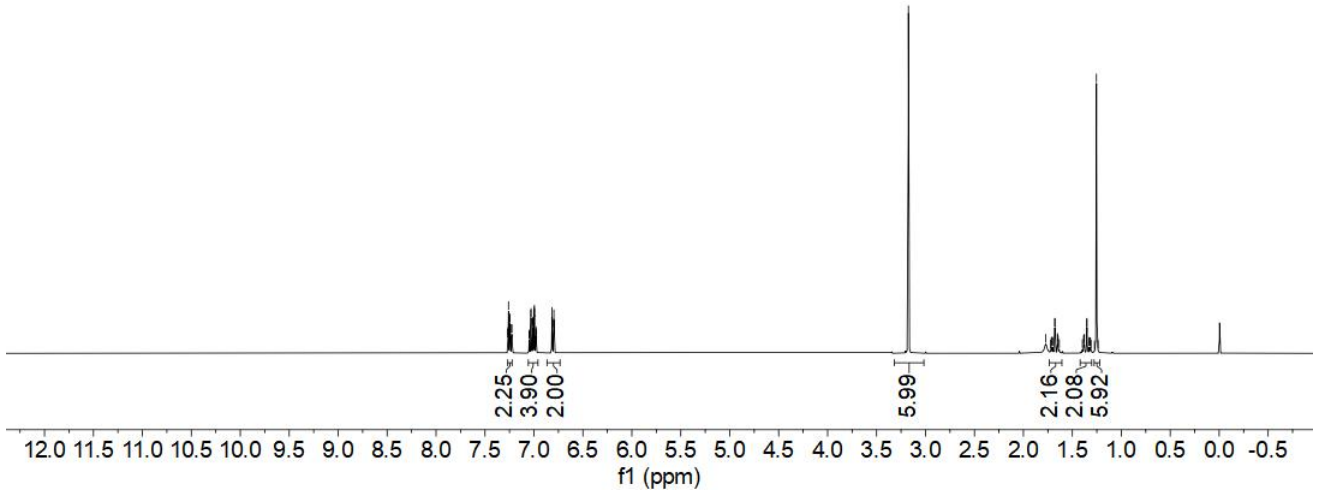

7.772  
7.760  
7.752  
7.740  
7.746  
7.453  
7.444  
7.440  
7.431  
7.428  
7.426  
7.415  
7.411  
7.402  
7.398  
7.390  
7.387  
7.384  
7.260  
7.238  
7.225  
7.213  
7.007  
6.995  
6.982  
6.842  
6.830  
6.817  
6.804  
-3.286

-1.842  
-1.599  
1.018  
1.005  
0.992

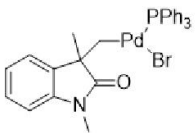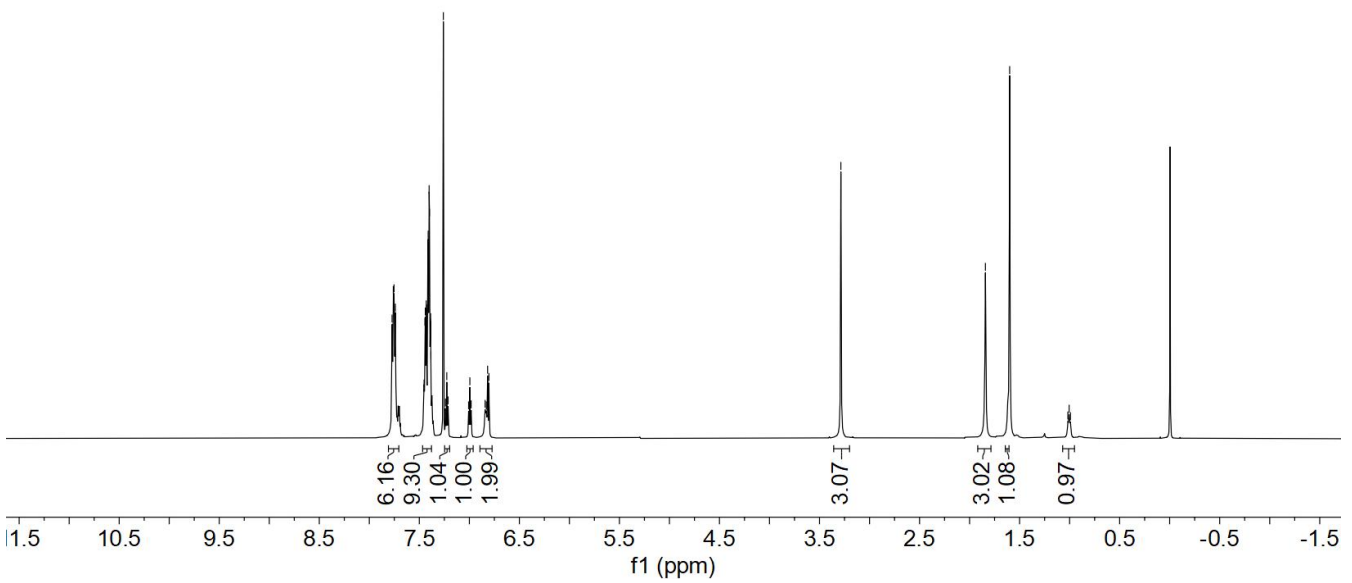

Supplement: d3nj05872g1.pdf [file d3nj05872g1.pdf]
